# Supplementary material for: A drug repurposing approach reveals targetable epigenetic pathways in Plasmodium vivax hypnozoites
Source: eLife. 2025 Sep 30;13:RP98221. doi: 10.7554/eLife.98221 (PMC12483515; doi:10.7554/eLife.98221)
Supplement: Figure 1—source data 1. [file elife-98221-fig1-data1.xlsx]

## Sheet: Figure1-PvLS-IPC
Table of individual P. vivax liver stage runs using the 8-day assay at IPC for Figure 1B. Yellow: inactivity of Monensin control likely due to solubility issues during source plate preparation. Bars represent SD of replicate wells.
Molecule Name	Synonyms	Batch Ref #	Run Date	Radical Cure Schizont Net Growth Area EC50 (μM)	Radical Cure Schizont Net Growth Area Maximum Inhibtion (%)	Radical Cure Schizont Net Growth Area Plot	Radical Cure Hypnozoite Quantity EC50 (μM)	Radical Cure Hypnozoite Quantity Maximum Inhibition (%)	Radical Cure Hypnozoite Quantity Plot	Radical Cure Toxicity CC50 (μM)	Radical Cure Toxicity Maximum Inhibtion (%)	Radical Cure Toxicity Plot	Primary Human Hepatocyte Lot	P. vivax Case	Screen Location
UGA-0031542	Cadralazine	RFM-008-828-8	2019-05-20	0.351	75.9		0.295	72.9		> 10.0	1.07		BGW	Pv836	IPC
UGA-0031542	Cadralazine	B2417	2019-05-22	0.621	85.9		1.02	92.3		> 50.0	7.13		BGW	Pv836	IPC
UGA-0031542	Cadralazine	RFM-008-828-8	2019-06-05	ND	65.5		0.34	87.8		> 10.0	4.13		BGW	Pv836	IPC
UGA-0000195	Budralazine	RFM-006-499-3	2019-05-20	> 10.0	39.5		> 10.0	28.3		> 10.0	-0.897		BGW	Pv836	IPC
UGA-0000195	Budralazine	RFM-006-499-3	2019-06-05	> 10.0	64		> 10.0	13.3		> 10.0	0.298		BGW	Pv836	IPC
UGA-0000247	KDU691	CBR-001-210-496-0	2019-05-20	0.21	81.6		> 3.00	19.6		> 3.00	-1.42		BGW	Pv836	IPC
UGA-0000247	KDU691	CBR-001-210-496-0	2019-05-28	> 0.111	61.8		> 3.00	8.91		> 3.00	-1.66		BGW	Pv836	IPC
UGA-0000247	KDU691	CBR-001-210-496-0	2019-06-05	0.0331	84.9		> 3.00	12.7		> 3.00	2.89		BGW	Pv836	IPC
UGA-0000247	KDU691	CBR-001-210-496-0	2019-06-06	> 0.333	67.2		> 3.00	0.523		> 3.00	4.54		BGW	Pv836	IPC
UGA-0002106	Monensin	CBR-001-547-426-7	2019-05-20	0.198	95.3		> 5.00	30		> 5.00	3.24		BGW	Pv836	IPC
UGA-0002106	Monensin	CBR-001-547-426-7	2019-05-28	0.232	92.3		> 5.00	14.2		> 5.00	-1.61		BGW	Pv836	IPC
UGA-0002106	Monensin	CBR-001-547-426-7	2019-06-05	0.14	96.7		> 5.00	25.1		> 5.00	0.428		BGW	Pv836	IPC
UGA-0002106	Monensin	CBR-001-547-426-7	2019-06-06	0.29	77.8		> 5.00	-2.26		> 5.00	3.26		BGW	Pv836	IPC
UGA-0002590	Nigericin	CBR-001-844-586-8	2019-05-20	0.00499	105		0.0128	101		> 0.100	4.33		BGW	Pv836	IPC
UGA-0002590	Nigericin	MMV638472-03	2019-05-22	0.00803	100		0.0227	101		> 0.200	10.8		BGW	Pv836	IPC
UGA-0002590	Nigericin	CBR-001-844-586-8	2019-05-28	0.00286	100		0.0109	102		> 0.100	13.7		BGW	Pv836	IPC
UGA-0002590	Nigericin	CBR-001-844-586-8	2019-06-05	0.00266	106		0.00897	100		> 0.100	9.8		BGW	Pv836	IPC
UGA-0002590	Nigericin	CBR-001-844-586-8	2019-06-06	> 0.100	93.5		0.0121	100		> 0.100	5.87		BGW	Pv836	IPC
UGA-0004210	Poziotinib	RFM-003-056-8	2019-05-20	> 10.0	50.9		> 10.0	36.2		> 10.0	15.4		BGW	Pv836	IPC
UGA-0004210	Poziotinib	RFM-003-056-8	2019-06-05	ND	70.1		> 10.0	28.5		> 10.0	6.52		BGW	Pv836	IPC
UGA-0004654	Plasmocid	RFM-001-042-4	2019-05-20	ND	59.3		> 3.33	58		> 10.0	11.3		BGW	Pv836	IPC
UGA-0004654	Plasmocid	RFM-001-042-4	2019-06-05	> 1.11	81.7		> 1.11	56.5		> 10.0	8.24		BGW	Pv836	IPC
UGA-0006483	Dramedilol	RFM-006-831-5	2019-05-20	> 10.0	43.8		> 10.0	30.6		> 10.0	6.24		BGW	Pv836	IPC
UGA-0006483	Dramedilol	RFM-006-831-5	2019-06-05	> 10.0	77.9		> 10.0	44.6		> 10.0	3.32		BGW	Pv836	IPC
UGA-0006593	RGH-5526	RFM-006-295-3	2019-05-20	> 10.0	52.9		> 10.0	24.6		> 10.0	3.6		BGW	Pv836	IPC
UGA-0006593	RGH-5526	RFM-006-295-3	2019-06-05	> 10.0	64.1		> 10.0	23		> 10.0	3.16		BGW	Pv836	IPC
UGA-0007518	Colforsin daropate	RFM-005-675-7	2019-05-28	> 10.0	39.1		0.0855	61.6		> 10.0	7.94		BGW	Pv836	IPC
UGA-0007518	Colforsin daropate	RFM-005-675-7	2019-06-06	> 10.0	60.5		> 10.0	17.4		> 10.0	7.03		BGW	Pv836	IPC
UGA-0008889	Dihydralazine	RFM-000-805-9	2019-05-20	> 10.0	43.1		> 10.0	17.6		> 10.0	-1.23		BGW	Pv836	IPC
UGA-0008889	Dihydralazine	RFM-000-805-9	2019-06-05	> 10.0	68.9		> 10.0	24.7		> 10.0	4.8		BGW	Pv836	IPC
UGA-0008949	MS-0735	RFM-001-066-2	2019-05-20	> 3.33	65.4		> 10.0	29.2		> 10.0	-0.21		BGW	Pv836	IPC
UGA-0008949	MS-0735	RFM-001-066-2	2019-06-05	> 3.33	86.4		3.76	64.5		> 10.0	4.43		BGW	Pv836	IPC
UGA-0009155	Todralazine	RFM-006-179-0	2019-05-20	> 10.0	31.7		> 10.0	4.64		> 10.0	-5.38		BGW	Pv836	IPC
UGA-0009155	Todralazine	RFM-006-179-0	2019-06-05	> 10.0	79.5		> 10.0	31.1		> 10.0	4.97		BGW	Pv836	IPC
UGA-0009341	PAN-811	RFM-006-013-9	2019-05-28	> 10.0	35.9		> 10.0	40.5		> 10.0	8.16		BGW	Pv836	IPC
UGA-0009341	PAN-811	RFM-006-013-9	2019-06-06	> 10.0	40.9		> 10.0	29.4		> 10.0	8.9		BGW	Pv836	IPC
UGA-0009478	Hydralazine	RFM-002-956-1	2019-05-20	> 10.0	47.4		ND	48.7		> 10.0	17.8		BGW	Pv836	IPC
UGA-0009478	Hydralazine	S256202	2019-05-22	3.79	81.5		> 16.7	89.8		> 50.0	3.75		BGW	Pv836	IPC
UGA-0009478	Hydralazine	RFM-002-956-1	2019-06-05	> 10.0	48.6		1.78	70		> 10.0	7.21		BGW	Pv836	IPC
UGA-0011768	Endralazine	RFM-007-087-1	2019-05-20	> 10.0	47.6		> 10.0	11.6		> 10.0	7.22		BGW	Pv836	IPC
UGA-0011768	Endralazine	RFM-007-087-1	2019-06-05	ND	73.4		> 10.0	38.7		> 10.0	17.7		BGW	Pv836	IPC
UGA-0012234	Pildralazine	RFM-010-809-8	2019-05-20	> 1.11	66.2		1.28	75.2		> 10.0	0.477		BGW	Pv836	IPC
UGA-0012234	Pildralazine	RFM-010-809-8	2019-06-05	ND	98.1		0.532	94.6		> 10.0	3.74		BGW	Pv836	IPC
UGA-0012344	Mopidralazine	RFM-010-923-9	2019-05-20	> 10.0	30.2		> 10.0	26.9		> 10.0	1.07		BGW	Pv836	IPC
UGA-0012344	Mopidralazine	RFM-010-923-9	2019-06-05	ND	71.2		> 10.0	24.7		> 10.0	2.98		BGW	Pv836	IPC
UGA-0015558	Narasin	RFM-012-760-6	2019-05-28	> 3.33	81.3		2.24	88.8		> 10.0	10		BGW	Pv836	IPC
UGA-0015558	Narasin	RFM-012-760-6	2019-06-06	0.315	123		1.16	99.5		> 10.0	10.7		BGW	Pv836	IPC
UGA-0016105	Rhodamine 123	RFM-012-847-2	2019-05-28	> 3.33	97.7		3.62	103		> 10.0	9.55		BGW	Pv836	IPC
UGA-0016105	Rhodamine 123	RFM-012-847-2	2019-06-06	> 3.33	90.9		9.79	81.7		> 10.0	12.7		BGW	Pv836	IPC

## Sheet: Figure1-PvLS-NITD
Table of individual P. vivax liver stage runs using the 8-day assay at Novartis Institute for Tropical Disease using a P. vivax case shipped from Mahidol Vivax Research Unit for Figure 1B and Figure 1--figure supplement 2. Bars represent SD of replicate wells.
Molecule Name	Synonyms	Batch Ref #	Run Date	Radical Cure Schizont Quantity t EC50 (μM)	Radical Cure Schizont Quantity Maximum Inhibtion (%)	Radical Cure Schizont Quantity Plot	Radical Cure Hypnozoite Quantity EC50 (μM)	Radical Cure Hypnozoite Quantity Maximum Inhibition (%)	Radical Cure Hypnozoite Quantity Plot	Radical Cure Toxicity CC50 (μM)	Radical Cure Toxicity Maximum Inhibtion (%)	Radical Cure Toxicity Plot	Primary Human Hepatocyte Lot	P. vivax Case	Screen Location
UGA-0031542	Cadralazine	Cadralazine-NITD-batch01	2021-02-25	> 3.33	60.5		0.246	82.3		> 10.0	2.93		BGW	VTTY201	NITD
UGA-0015557	Maduramicin	Maduramicin-NITD-batch01	2021-02-25	< 0.0137	100		< 0.0137	100		0.937	56.6		BGW	VTTY201	NITD
UGA-0009478	Hydralazine	Hydralazine-NITD-batch01	2021-02-25	> 10.0	44.7		0.633	80.8		> 10.0	3.6		BGW	VTTY201	NITD
UGA-0004210	Poziotinib	Poziotinib-NITD-batch01	2021-02-25	1.81	92.1		0.677	95.9		> 10.0	1.81		BGW	VTTY201	NITD

## Sheet: Figure1-PcLS-UGA
Table of individual P. cynomolgi liver stage runs using the 8-day assay at the University of Georgia using the Rossan strain for Figure 1B. Bars represent SD of replicate wells.
Molecule Name	Synonyms	Batch Ref #	Run Date	Radical Cure Schizont Net Growth Area EC50 (μM)	Radical Cure Schizont Net Growth Area Maximum Inhibtion (%)	Radical Cure Schizont Net Growth Area Plot	Radical Cure Hypnozoite Quantity EC50 (μM)	Radical Cure Hypnozoite Quantity Maximum Inhibition (%)	Radical Cure Hypnozoite Quantity Plot	Radical Cure Toxicity CC50 (μM)	Radical Cure Toxicity Maximum Inhibtion (%)	Radical Cure Toxicity Plot	Primary Simian Hepatocyte Lot	P. cynomolgi Strain	Screen Location
UGA-0031542	Cadralazine	G3020	2022-04-01	> 50.0	61.6		> 50.0	38.7		> 16.7	16.2		NPI	P. cynomolgi Rossan	UGA
UGA-0015557	Maduramicin	K1715	2022-04-01	< 460E-06	110		0.00548	103		> 0.111	46.9		NPI	P. cynomolgi Rossan	UGA
UGA-0009478	Hydralazine	S256202	2022-04-01	> 50.0	56.7		> 50.0	42		> 16.7	16.9		NPI	P. cynomolgi Rossan	UGA
UGA-0031542	Cadralazine	G3020	2022-04-02	> 50.0	23.8		> 50.0	7.34		> 16.7	22.9		CWP	P. cynomolgi Rossan	UGA
UGA-0015557	Maduramicin	K1715	2022-04-02	< 460E-06	120		0.0324	101		> 1.00	45.3		CWP	P. cynomolgi Rossan	UGA
UGA-0009478	Hydralazine	S256202	2022-04-02	ND	87.3		17.6	66.1		> 16.7	29.1		CWP	P. cynomolgi Rossan	UGA

## Sheet: Figure1-PcLS-NITD
Table of individual P. cynomolgi liver stage runs using the 8-day assay at Novartis Institute for Tropical Disease using P. cynomolgi B strain shipped from Armed Forces Research Institute of Medical Science for Figure 1B and Supplemental File 2. Bars represent SD of replicate wells.
Molecule Name	Synonyms	Batch Ref #	Run Date	Radical Cure Schizont Quantity t EC50 (μM)	Radical Cure Schizont Quantity Maximum Inhibtion (%)	Radical Cure Schizont Quantity Plot	Radical Cure Hypnozoite Quantity EC50 (μM)	Radical Cure Hypnozoite Quantity Maximum Inhibition (%)	Radical Cure Hypnozoite Quantity Plot	Radical Cure Toxicity CC50 (μM)	Radical Cure Toxicity Maximum Inhibtion (%)	Radical Cure Toxicity Plot	Primary Simian Hepatocyte Lot	P. cynomolgi Strain	Screen Location
UGA-0000195	Budralazine	D3019	2020-09-29	> 10.0	15.7		> 10.0	4.35		> 10.0	3.04		NPI	P. cynomolgi B	NITD
UGA-0004210	Poziotinib	Poziotinib-NITD-batch01	2021-01-21	1.1	97.5		> 1.11	66.9		1.52	68.5		NPI	P. cynomolgi B	NITD
UGA-0004210	Poziotinib	Poziotinib-NITD-batch01	2021-09-23	3.07	100		> 10.0	12.5		3.45	53.8		XXJ	P. cynomolgi B	NITD
UGA-0004210	Poziotinib	Poziotinib-NITD-batch01	2021-09-24	> 10.0	17.2		2.13	95		2.52	55.1		NDO	P. cynomolgi B	NITD
UGA-0009478	Hydralazine	Hydralazine-NITD-batch01	2021-01-21	> 10.0	32		> 10.0	35.4		> 10.0	18.2		NPI	P. cynomolgi B	NITD
UGA-0009478	Hydralazine	Hydralazine-NITD-batch01	2021-09-23	> 10.0	7.14		> 10.0	20.5		> 10.0	2.6		XXJ	P. cynomolgi B	NITD
UGA-0009478	Hydralazine	Hydralazine-NITD-batch01	2021-09-24	> 10.0	2.6		> 10.0	26.2		> 10.0	5.28		NDO	P. cynomolgi B	NITD
UGA-0015557	Maduramicin	Maduramicin-NITD-batch01	2021-01-21	< 0.0137	100		0.0174	85.7		1.11	93.9		NPI	P. cynomolgi B	NITD
UGA-0015557	Maduramicin	Maduramicin-NITD-batch01	2021-09-23	0.0277	100		0.0343	92.1		3.61	76.7		XXJ	P. cynomolgi B	105.248
UGA-0015557	Maduramicin	Maduramicin-NITD-batch01	2021-09-24	0.0172	85.7		< 0.0137	100		1.07	94.3		NDO	P. cynomolgi B
UGA-0031542	Cadralazine	B2417	2020-09-29	> 10.0	41.1		> 10.0	30.3		> 10.0	39.3		NPI	P. cynomolgi B
UGA-0031542	Cadralazine	Cadralazine-NITD-batch01	2021-01-21	> 10.0	40		> 10.0	9.9		> 10.0	3.61		NPI	P. cynomolgi B
UGA-0031542	Cadralazine	Cadralazine-NITD-batch01	2021-09-23	> 10.0	7.14		> 10.0	11.4		> 10.0	-0.784		XXJ	P. cynomolgi B
UGA-0031542	Cadralazine	Cadralazine-NITD-batch01	2021-09-24	> 10.0	4.17		> 10.0	12.5		> 10.0	2.95		NDO	P. cynomolgi B
