# Supplementary material for: A drug repurposing approach reveals targetable epigenetic pathways in Plasmodium vivax hypnozoites
Source: eLife. 2025 Sep 30;13:RP98221. doi: 10.7554/eLife.98221 (PMC12483515; doi:10.7554/eLife.98221)
Supplement: Figure 2—source data 1. [file elife-98221-fig2-data1.xlsx]

## Sheet: Figure2-Synergy
Table of compound concentrations and hypnozoite inhbition used for Figure 2, Figure 2--figure supplement 1
Replicate	Row	Column	[Cadralazine], (µM)	[5-azacytidine], (µM)	Log [Cadralazine], M	Log [5-azacytidine], M	Hypnozoite Inhibition (%)
Replicate 1	A	1	50	0	-4.30103	0	96.7638
Replicate 1	A	2	25	0	-4.60206	0	90.2913
Replicate 1	A	3	12.5	0	-4.90309	0	87.055
Replicate 1	A	4	6.25	0	-5.20412	0	82.2006
Replicate 1	A	5	3.125	0	-5.50515	0	72.4919
Replicate 1	A	6	1.5625	0	-5.80618	0	51.4563
Replicate 1	A	7	0.78125	0	-6.10721	0	53.0744
Replicate 1	A	8	0.390625	0	-6.40824	0	51.4563
Replicate 1	A	9	0.195312	0	-6.70927	0	22.3301
Replicate 1	A	10	0.0976562	0	-7.0103	0	-6.79612
Replicate 1	A	11	0.0488281	0	-7.31133	0	6.14887
Replicate 1	A	12	0.0244141	0	-7.61236	0	-13.2686
Replicate 1	A	13	50	0	-4.30103	0	91.9094
Replicate 1	A	14	25	0	-4.60206	0	93.5275
Replicate 1	A	15	12.5	0	-4.90309	0	83.8188
Replicate 1	A	16	6.25	0	-5.20412	0	87.055
Replicate 1	A	17	3.125	0	-5.50515	0	67.6375
Replicate 1	A	18	1.5625	0	-5.80618	0	72.4919
Replicate 1	A	19	0.78125	0	-6.10721	0	72.4919
Replicate 1	A	20	0.390625	0	-6.40824	0	25.5663
Replicate 1	A	21	0.195312	0	-6.70927	0	6.14887
Replicate 1	A	22	0.0976562	0	-7.0103	0	-8.41424
Replicate 1	A	23	0.0488281	0	-7.31133	0	-5.17799
Replicate 1	A	24	0.0244141	0	-7.61236	0	-19.7411
Replicate 1	B	1	0	50	0	-4.30103	-14.8867
Replicate 1	B	2	0	25	0	-4.60206	30.4207
Replicate 1	B	3	0	12.5	0	-4.90309	15.8576
Replicate 1	B	4	0	6.25	0	-5.20412	19.0939
Replicate 1	B	5	0	3.125	0	-5.50515	-45.6311
Replicate 1	B	6	0	1.5625	0	-5.80618	14.2395
Replicate 1	B	7	0	0.78125	0	-6.10721	9.38511
Replicate 1	B	8	0	0.390625	0	-6.40824	17.4757
Replicate 1	B	9	0	0.195312	0	-6.70927	-35.9223
Replicate 1	B	10	0	0.0976562	0	-7.0103	11.0032
Replicate 1	B	11	0	0.0488281	0	-7.31133	1.2945
Replicate 1	B	12	0	0.0244141	0	-7.61236	-10.0324
Replicate 1	B	13	0	50	0	-4.30103	67.6375
Replicate 1	B	14	0	25	0	-4.60206	20.712
Replicate 1	B	15	0	12.5	0	-4.90309	35.2751
Replicate 1	B	16	0	6.25	0	-5.20412	15.8576
Replicate 1	B	17	0	3.125	0	-5.50515	-16.5049
Replicate 1	B	18	0	1.5625	0	-5.80618	9.38511
Replicate 1	B	19	0	0.78125	0	-6.10721	4.53074
Replicate 1	B	20	0	0.390625	0	-6.40824	30.4207
Replicate 1	B	21	0	0.195312	0	-6.70927	15.8576
Replicate 1	B	22	0	0.0976562	0	-7.0103	22.3301
Replicate 1	B	23	0	0.0488281	0	-7.31133	51.4563
Replicate 1	B	24	0	0.0244141	0	-7.61236	6.14887
Replicate 1	C	1	45.5	4.5	-4.34199	-5.34679	95.1456
Replicate 1	C	2	22.75	2.25	-4.64302	-5.64782	91.9094
Replicate 1	C	3	11.375	1.125	-4.94405	-5.94885	93.5275
Replicate 1	C	4	5.6875	0.5625	-5.24508	-6.24988	90.2913
Replicate 1	C	5	2.84375	0.28125	-5.54611	-6.55091	87.055
Replicate 1	C	6	1.42188	0.140625	-5.84714	-6.85194	77.3463
Replicate 1	C	7	0.710938	0.0703125	-6.14817	-7.15297	53.0744
Replicate 1	C	8	0.355469	0.0351562	-6.4492	-7.454	32.0388
Replicate 1	C	9	0.177734	0.0175781	-6.75023	-7.75503	25.5663
Replicate 1	C	10	0.0888672	0.00878906	-7.05126	-8.05606	19.0939
Replicate 1	C	11	0.0444336	0.00439453	-7.35229	-8.35709	23.9482
Replicate 1	C	12	0.0222168	0.00219727	-7.65332	-8.65812	-31.068
Replicate 1	C	13	45.5	4.5	-4.34199	-5.34679	96.7638
Replicate 1	C	14	22.75	2.25	-4.64302	-5.64782	87.055
Replicate 1	C	15	11.375	1.125	-4.94405	-5.94885	95.1456
Replicate 1	C	16	5.6875	0.5625	-5.24508	-6.24988	93.5275
Replicate 1	C	17	2.84375	0.28125	-5.54611	-6.55091	87.055
Replicate 1	C	18	1.42188	0.140625	-5.84714	-6.85194	70.8738
Replicate 1	C	19	0.710938	0.0703125	-6.14817	-7.15297	36.8932
Replicate 1	C	20	0.355469	0.0351562	-6.4492	-7.454	40.1294
Replicate 1	C	21	0.177734	0.0175781	-6.75023	-7.75503	57.9288
Replicate 1	C	22	0.0888672	0.00878906	-7.05126	-8.05606	40.1294
Replicate 1	C	23	0.0444336	0.00439453	-7.35229	-8.35709	38.5113
Replicate 1	C	24	0.0222168	0.00219727	-7.65332	-8.65812	49.8382
Replicate 1	D	1	4.5	45.5	-5.34679	-4.34199	59.5469
Replicate 1	D	2	2.25	22.75	-5.64782	-4.64302	77.3463
Replicate 1	D	3	1.125	11.375	-5.94885	-4.94405	69.2557
Replicate 1	D	4	0.5625	5.6875	-6.24988	-5.24508	59.5469
Replicate 1	D	5	0.28125	2.84375	-6.55091	-5.54611	43.3657
Replicate 1	D	6	0.140625	1.42188	-6.85194	-5.84714	27.1845
Replicate 1	D	7	0.0703125	0.710938	-7.15297	-6.14817	6.14887
Replicate 1	D	8	0.0351562	0.355469	-7.454	-6.4492	25.5663
Replicate 1	D	9	0.0175781	0.177734	-7.75503	-6.75023	41.7476
Replicate 1	D	10	0.00878906	0.0888672	-8.05606	-7.05126	11.0032
Replicate 1	D	11	0.00439453	0.0444336	-8.35709	-7.35229	28.8026
Replicate 1	D	12	0.00219727	0.0222168	-8.65812	-7.65332	28.8026
Replicate 1	D	13	4.5	45.5	-5.34679	-4.34199	87.055
Replicate 1	D	14	2.25	22.75	-5.64782	-4.64302	83.8188
Replicate 1	D	15	1.125	11.375	-5.94885	-4.94405	85.4369
Replicate 1	D	16	0.5625	5.6875	-6.24988	-5.24508	72.4919
Replicate 1	D	17	0.28125	2.84375	-6.55091	-5.54611	35.2751
Replicate 1	D	18	0.140625	1.42188	-6.85194	-5.84714	54.6926
Replicate 1	D	19	0.0703125	0.710938	-7.15297	-6.14817	23.9482
Replicate 1	D	20	0.0351562	0.355469	-7.454	-6.4492	38.5113
Replicate 1	D	21	0.0175781	0.177734	-7.75503	-6.75023	33.657
Replicate 1	D	22	0.00878906	0.0888672	-8.05606	-7.05126	38.5113
Replicate 1	D	23	0.00439453	0.0444336	-8.35709	-7.35229	62.7832
Replicate 1	D	24	0.00219727	0.0222168	-8.65812	-7.65332	48.2201
Replicate 1	E	1	44.5	5.5	-4.35164	-5.25964	95.1456
Replicate 1	E	2	22.25	2.75	-4.65267	-5.56067	95.1456
Replicate 1	E	3	11.125	1.375	-4.9537	-5.8617	91.9094
Replicate 1	E	4	5.5625	0.6875	-5.25473	-6.16273	91.9094
Replicate 1	E	5	2.78125	0.34375	-5.55576	-6.46376	90.2913
Replicate 1	E	6	1.39062	0.171875	-5.85679	-6.76479	72.4919
Replicate 1	E	7	0.695312	0.0859375	-6.15782	-7.06582	56.3107
Replicate 1	E	8	0.347656	0.0429688	-6.45885	-7.36685	41.7476
Replicate 1	E	9	0.173828	0.0214844	-6.75988	-7.66788	54.6926
Replicate 1	E	10	0.0869141	0.0107422	-7.06091	-7.96891	35.2751
Replicate 1	E	11	0.043457	0.00537109	-7.36194	-8.26994	4.53074
Replicate 1	E	12	0.0217285	0.00268555	-7.66297	-8.57097	9.38511
Replicate 1	E	13	44.5	5.5	-4.35164	-5.25964	98.3819
Replicate 1	E	14	22.25	2.75	-4.65267	-5.56067	96.7638
Replicate 1	E	15	11.125	1.375	-4.9537	-5.8617	88.6731
Replicate 1	E	16	5.5625	0.6875	-5.25473	-6.16273	95.1456
Replicate 1	E	17	2.78125	0.34375	-5.55576	-6.46376	83.8188
Replicate 1	E	18	1.39062	0.171875	-5.85679	-6.76479	82.2006
Replicate 1	E	19	0.695312	0.0859375	-6.15782	-7.06582	75.7282
Replicate 1	E	20	0.347656	0.0429688	-6.45885	-7.36685	56.3107
Replicate 1	E	21	0.173828	0.0214844	-6.75988	-7.66788	57.9288
Replicate 1	E	22	0.0869141	0.0107422	-7.06091	-7.96891	57.9288
Replicate 1	E	23	0.043457	0.00537109	-7.36194	-8.26994	72.4919
Replicate 1	E	24	0.0217285	0.00268555	-7.66297	-8.57097	74.11
Replicate 1	F	1	5.5	44.5	-5.25964	-4.35164	67.6375
Replicate 1	F	2	2.75	22.25	-5.56067	-4.65267	87.055
Replicate 1	F	3	1.375	11.125	-5.8617	-4.9537	80.5825
Replicate 1	F	4	0.6875	5.5625	-6.16273	-5.25473	64.4013
Replicate 1	F	5	0.34375	2.78125	-6.46376	-5.55576	41.7476
Replicate 1	F	6	0.171875	1.39062	-6.76479	-5.85679	22.3301
Replicate 1	F	7	0.0859375	0.695312	-7.06582	-6.15782	28.8026
Replicate 1	F	8	0.0429688	0.347656	-7.36685	-6.45885	32.0388
Replicate 1	F	9	0.0214844	0.173828	-7.66788	-6.75988	4.53074
Replicate 1	F	10	0.0107422	0.0869141	-7.96891	-7.06091	25.5663
Replicate 1	F	11	0.00537109	0.043457	-8.26994	-7.36194	36.8932
Replicate 1	F	12	0.00268555	0.0217285	-8.57097	-7.66297	33.657
Replicate 1	F	13	5.5	44.5	-5.25964	-4.35164	90.2913
Replicate 1	F	14	2.75	22.25	-5.56067	-4.65267	87.055
Replicate 1	F	15	1.375	11.125	-5.8617	-4.9537	85.4369
Replicate 1	F	16	0.6875	5.5625	-6.16273	-5.25473	82.2006
Replicate 1	F	17	0.34375	2.78125	-6.46376	-5.55576	41.7476
Replicate 1	F	18	0.171875	1.39062	-6.76479	-5.85679	51.4563
Replicate 1	F	19	0.0859375	0.695312	-7.06582	-6.15782	14.2395
Replicate 1	F	20	0.0429688	0.347656	-7.36685	-6.45885	35.2751
Replicate 1	F	21	0.0214844	0.173828	-7.66788	-6.75988	67.6375
Replicate 1	F	22	0.0107422	0.0869141	-7.96891	-7.06091	49.8382
Replicate 1	F	23	0.00537109	0.043457	-8.26994	-7.36194	80.5825
Replicate 1	F	24	0.00268555	0.0217285	-8.57097	-7.66297	87.055
Replicate 1	G	1	42.75	7.25	-4.36906	-5.13966	95.1456
Replicate 1	G	2	21.375	3.625	-4.67009	-5.44069	95.1456
Replicate 1	G	3	10.6875	1.8125	-4.97112	-5.74172	95.1456
Replicate 1	G	4	5.34375	0.90625	-5.27215	-6.04275	90.2913
Replicate 1	G	5	2.67188	0.453125	-5.57318	-6.34378	95.1456
Replicate 1	G	6	1.33594	0.226562	-5.87421	-6.64481	80.5825
Replicate 1	G	7	0.667969	0.113281	-6.17524	-6.94584	54.6926
Replicate 1	G	8	0.333984	0.0566406	-6.47627	-7.24687	66.0194
Replicate 1	G	9	0.166992	0.0283203	-6.7773	-7.5479	22.3301
Replicate 1	G	10	0.0834961	0.0141602	-7.07833	-7.84893	25.5663
Replicate 1	G	11	0.041748	0.00708008	-7.37936	-8.14996	19.0939
Replicate 1	G	12	0.020874	0.00354004	-7.68039	-8.45099	23.9482
Replicate 1	G	13	42.75	7.25	-4.36906	-5.13966	100
Replicate 1	G	14	21.375	3.625	-4.67009	-5.44069	90.2913
Replicate 1	G	15	10.6875	1.8125	-4.97112	-5.74172	88.6731
Replicate 1	G	16	5.34375	0.90625	-5.27215	-6.04275	91.9094
Replicate 1	G	17	2.67188	0.453125	-5.57318	-6.34378	88.6731
Replicate 1	G	18	1.33594	0.226562	-5.87421	-6.64481	83.8188
Replicate 1	G	19	0.667969	0.113281	-6.17524	-6.94584	74.11
Replicate 1	G	20	0.333984	0.0566406	-6.47627	-7.24687	59.5469
Replicate 1	G	21	0.166992	0.0283203	-6.7773	-7.5479	56.3107
Replicate 1	G	22	0.0834961	0.0141602	-7.07833	-7.84893	61.165
Replicate 1	G	23	0.041748	0.00708008	-7.37936	-8.14996	80.5825
Replicate 1	G	24	0.020874	0.00354004	-7.68039	-8.45099	96.7638
Replicate 1	H	1	7.25	42.75	-5.13966	-4.36906	88.6731
Replicate 1	H	2	3.625	21.375	-5.44069	-4.67009	77.3463
Replicate 1	H	3	1.8125	10.6875	-5.74172	-4.97112	83.8188
Replicate 1	H	4	0.90625	5.34375	-6.04275	-5.27215	72.4919
Replicate 1	H	5	0.453125	2.67188	-6.34378	-5.57318	54.6926
Replicate 1	H	6	0.226562	1.33594	-6.64481	-5.87421	62.7832
Replicate 1	H	7	0.113281	0.667969	-6.94584	-6.17524	41.7476
Replicate 1	H	8	0.0566406	0.333984	-7.24687	-6.47627	12.6214
Replicate 1	H	9	0.0283203	0.166992	-7.5479	-6.7773	2.91262
Replicate 1	H	10	0.0141602	0.0834961	-7.84893	-7.07833	1.2945
Replicate 1	H	11	0.00708008	0.041748	-8.14996	-7.37936	27.1845
Replicate 1	H	12	0.00354004	0.020874	-8.45099	-7.68039	7.76699
Replicate 1	H	13	7.25	42.75	-5.13966	-4.36906	98.3819
Replicate 1	H	14	3.625	21.375	-5.44069	-4.67009	90.2913
Replicate 1	H	15	1.8125	10.6875	-5.74172	-4.97112	77.3463
Replicate 1	H	16	0.90625	5.34375	-6.04275	-5.27215	82.2006
Replicate 1	H	17	0.453125	2.67188	-6.34378	-5.57318	75.7282
Replicate 1	H	18	0.226562	1.33594	-6.64481	-5.87421	40.1294
Replicate 1	H	19	0.113281	0.667969	-6.94584	-6.17524	54.6926
Replicate 1	H	20	0.0566406	0.333984	-7.24687	-6.47627	46.6019
Replicate 1	H	21	0.0283203	0.166992	-7.5479	-6.7773	59.5469
Replicate 1	H	22	0.0141602	0.0834961	-7.84893	-7.07833	51.4563
Replicate 1	H	23	0.00708008	0.041748	-8.14996	-7.37936	72.4919
Replicate 1	H	24	0.00354004	0.020874	-8.45099	-7.68039	96.7638
Replicate 1	I	1	40	10	-4.39794	-5	91.9094
Replicate 1	I	2	20	5	-4.69897	-5.30103	95.1456
Replicate 1	I	3	10	2.5	-5	-5.60206	96.7638
Replicate 1	I	4	5	1.25	-5.30103	-5.90309	88.6731
Replicate 1	I	5	2.5	0.625	-5.60206	-6.20412	90.2913
Replicate 1	I	6	1.25	0.3125	-5.90309	-6.50515	70.8738
Replicate 1	I	7	0.625	0.15625	-6.20412	-6.80618	59.5469
Replicate 1	I	8	0.3125	0.078125	-6.50515	-7.10721	54.6926
Replicate 1	I	9	0.15625	0.0390625	-6.80618	-7.40824	19.0939
Replicate 1	I	10	0.078125	0.0195312	-7.10721	-7.70927	32.0388
Replicate 1	I	11	0.0390625	0.00976562	-7.40824	-8.0103	-1.94175
Replicate 1	I	12	0.0195312	0.00488281	-7.70927	-8.31133	17.4757
Replicate 1	I	13	40	10	-4.39794	-5	93.5275
Replicate 1	I	14	20	5	-4.69897	-5.30103	91.9094
Replicate 1	I	15	10	2.5	-5	-5.60206	90.2913
Replicate 1	I	16	5	1.25	-5.30103	-5.90309	90.2913
Replicate 1	I	17	2.5	0.625	-5.60206	-6.20412	85.4369
Replicate 1	I	18	1.25	0.3125	-5.90309	-6.50515	85.4369
Replicate 1	I	19	0.625	0.15625	-6.20412	-6.80618	67.6375
Replicate 1	I	20	0.3125	0.078125	-6.50515	-7.10721	74.11
Replicate 1	I	21	0.15625	0.0390625	-6.80618	-7.40824	64.4013
Replicate 1	I	22	0.078125	0.0195312	-7.10721	-7.70927	54.6926
Replicate 1	I	23	0.0390625	0.00976562	-7.40824	-8.0103	62.7832
Replicate 1	I	24	0.0195312	0.00488281	-7.70927	-8.31133	95.1456
Replicate 1	J	1	10	40	-5	-4.39794	85.4369
Replicate 1	J	2	5	20	-5.30103	-4.69897	83.8188
Replicate 1	J	3	2.5	10	-5.60206	-5	91.9094
Replicate 1	J	4	1.25	5	-5.90309	-5.30103	83.8188
Replicate 1	J	5	0.625	2.5	-6.20412	-5.60206	70.8738
Replicate 1	J	6	0.3125	1.25	-6.50515	-5.90309	49.8382
Replicate 1	J	7	0.15625	0.625	-6.80618	-6.20412	32.0388
Replicate 1	J	8	0.078125	0.3125	-7.10721	-6.50515	-8.41424
Replicate 1	J	9	0.0390625	0.15625	-7.40824	-6.80618	23.9482
Replicate 1	J	10	0.0195312	0.078125	-7.70927	-7.10721	-3.55987
Replicate 1	J	11	0.00976562	0.0390625	-8.0103	-7.40824	-8.41424
Replicate 1	J	12	0.00488281	0.0195312	-8.31133	-7.70927	32.0388
Replicate 1	J	13	10	40	-5	-4.39794	87.055
Replicate 1	J	14	5	20	-5.30103	-4.69897	90.2913
Replicate 1	J	15	2.5	10	-5.60206	-5	91.9094
Replicate 1	J	16	1.25	5	-5.90309	-5.30103	83.8188
Replicate 1	J	17	0.625	2.5	-6.20412	-5.60206	91.9094
Replicate 1	J	18	0.3125	1.25	-6.50515	-5.90309	25.5663
Replicate 1	J	19	0.15625	0.625	-6.80618	-6.20412	35.2751
Replicate 1	J	20	0.078125	0.3125	-7.10721	-6.50515	44.9838
Replicate 1	J	21	0.0390625	0.15625	-7.40824	-6.80618	78.9644
Replicate 1	J	22	0.0195312	0.078125	-7.70927	-7.10721	51.4563
Replicate 1	J	23	0.00976562	0.0390625	-8.0103	-7.40824	74.11
Replicate 1	J	24	0.00488281	0.0195312	-8.31133	-7.70927	91.9094
Replicate 1	K	1	33.25	16.75	-4.47821	-4.77599	93.5275
Replicate 1	K	2	16.625	8.375	-4.77924	-5.07702	91.9094
Replicate 1	K	3	8.3125	4.1875	-5.08027	-5.37805	88.6731
Replicate 1	K	4	4.15625	2.09375	-5.3813	-5.67908	91.9094
Replicate 1	K	5	2.07812	1.04688	-5.68233	-5.98011	87.055
Replicate 1	K	6	1.03906	0.523438	-5.98336	-6.28114	69.2557
Replicate 1	K	7	0.519531	0.261719	-6.28439	-6.58217	61.165
Replicate 1	K	8	0.259766	0.130859	-6.58542	-6.8832	54.6926
Replicate 1	K	9	0.129883	0.0654297	-6.88645	-7.18423	28.8026
Replicate 1	K	10	0.0649414	0.0327148	-7.18748	-7.48526	6.14887
Replicate 1	K	11	0.0324707	0.0163574	-7.48851	-7.78629	6.14887
Replicate 1	K	12	0.0162354	0.00817871	-7.78954	-8.08732	4.53074
Replicate 1	K	13	33.25	16.75	-4.47821	-4.77599	98.3819
Replicate 1	K	14	16.625	8.375	-4.77924	-5.07702	96.7638
Replicate 1	K	15	8.3125	4.1875	-5.08027	-5.37805	91.9094
Replicate 1	K	16	4.15625	2.09375	-5.3813	-5.67908	88.6731
Replicate 1	K	17	2.07812	1.04688	-5.68233	-5.98011	85.4369
Replicate 1	K	18	1.03906	0.523438	-5.98336	-6.28114	66.0194
Replicate 1	K	19	0.519531	0.261719	-6.28439	-6.58217	74.11
Replicate 1	K	20	0.259766	0.130859	-6.58542	-6.8832	72.4919
Replicate 1	K	21	0.129883	0.0654297	-6.88645	-7.18423	46.6019
Replicate 1	K	22	0.0649414	0.0327148	-7.18748	-7.48526	72.4919
Replicate 1	K	23	0.0324707	0.0163574	-7.48851	-7.78629	78.9644
Replicate 1	K	24	0.0162354	0.00817871	-7.78954	-8.08732	95.1456
Replicate 1	L	1	16.75	33.25	-4.77599	-4.47821	87.055
Replicate 1	L	2	8.375	16.625	-5.07702	-4.77924	93.5275
Replicate 1	L	3	4.1875	8.3125	-5.37805	-5.08027	87.055
Replicate 1	L	4	2.09375	4.15625	-5.67908	-5.3813	83.8188
Replicate 1	L	5	1.04688	2.07812	-5.98011	-5.68233	85.4369
Replicate 1	L	6	0.523438	1.03906	-6.28114	-5.98336	62.7832
Replicate 1	L	7	0.261719	0.519531	-6.58217	-6.28439	32.0388
Replicate 1	L	8	0.130859	0.259766	-6.8832	-6.58542	28.8026
Replicate 1	L	9	0.0654297	0.129883	-7.18423	-6.88645	59.5469
Replicate 1	L	10	0.0327148	0.0649414	-7.48526	-7.18748	12.6214
Replicate 1	L	11	0.0163574	0.0324707	-7.78629	-7.48851	19.0939
Replicate 1	L	12	0.00817871	0.0162354	-8.08732	-7.78954	12.6214
Replicate 1	L	13	16.75	33.25	-4.77599	-4.47821	95.1456
Replicate 1	L	14	8.375	16.625	-5.07702	-4.77924	93.5275
Replicate 1	L	15	4.1875	8.3125	-5.37805	-5.08027	93.5275
Replicate 1	L	16	2.09375	4.15625	-5.67908	-5.3813	87.055
Replicate 1	L	17	1.04688	2.07812	-5.98011	-5.68233	80.5825
Replicate 1	L	18	0.523438	1.03906	-6.28114	-5.98336	72.4919
Replicate 1	L	19	0.261719	0.519531	-6.58217	-6.28439	49.8382
Replicate 1	L	20	0.130859	0.259766	-6.8832	-6.58542	44.9838
Replicate 1	L	21	0.0654297	0.129883	-7.18423	-6.88645	87.055
Replicate 1	L	22	0.0327148	0.0649414	-7.48526	-7.18748	51.4563
Replicate 1	L	23	0.0163574	0.0324707	-7.78629	-7.48851	64.4013
Replicate 1	L	24	0.00817871	0.0162354	-8.08732	-7.78954	82.2006
Replicate 1	M	1	25	25	-4.60206	-4.60206	91.9094
Replicate 1	M	2	12.5	12.5	-4.90309	-4.90309	91.9094
Replicate 1	M	3	6.25	6.25	-5.20412	-5.20412	98.3819
Replicate 1	M	4	3.125	3.125	-5.50515	-5.50515	95.1456
Replicate 1	M	5	1.5625	1.5625	-5.80618	-5.80618	87.055
Replicate 1	M	6	0.78125	0.78125	-6.10721	-6.10721	59.5469
Replicate 1	M	7	0.390625	0.390625	-6.40824	-6.40824	53.0744
Replicate 1	M	8	0.195312	0.195312	-6.70927	-6.70927	30.4207
Replicate 1	M	9	0.0976562	0.0976562	-7.0103	-7.0103	40.1294
Replicate 1	M	10	0.0488281	0.0488281	-7.31133	-7.31133	20.712
Replicate 1	M	11	0.0244141	0.0244141	-7.61236	-7.61236	30.4207
Replicate 1	M	12	0.012207	0.012207	-7.91339	-7.91339	14.2395
Replicate 1	M	13	25	25	-4.60206	-4.60206	93.5275
Replicate 1	M	14	12.5	12.5	-4.90309	-4.90309	90.2913
Replicate 1	M	15	6.25	6.25	-5.20412	-5.20412	93.5275
Replicate 1	M	16	3.125	3.125	-5.50515	-5.50515	90.2913
Replicate 1	M	17	1.5625	1.5625	-5.80618	-5.80618	85.4369
Replicate 1	M	18	0.78125	0.78125	-6.10721	-6.10721	75.7282
Replicate 1	M	19	0.390625	0.390625	-6.40824	-6.40824	54.6926
Replicate 1	M	20	0.195312	0.195312	-6.70927	-6.70927	61.165
Replicate 1	M	21	0.0976562	0.0976562	-7.0103	-7.0103	33.657
Replicate 1	M	22	0.0488281	0.0488281	-7.31133	-7.31133	19.0939
Replicate 1	M	23	0.0244141	0.0244141	-7.61236	-7.61236	77.3463
Replicate 1	M	24	0.012207	0.012207	-7.91339	-7.91339	67.6375
Replicate 1	N	1	25	25	-4.60206	-4.60206	87.055
Replicate 1	N	2	12.5	12.5	-4.90309	-4.90309	90.2913
Replicate 1	N	3	6.25	6.25	-5.20412	-5.20412	95.1456
Replicate 1	N	4	3.125	3.125	-5.50515	-5.50515	90.2913
Replicate 1	N	5	1.5625	1.5625	-5.80618	-5.80618	85.4369
Replicate 1	N	6	0.78125	0.78125	-6.10721	-6.10721	64.4013
Replicate 1	N	7	0.390625	0.390625	-6.40824	-6.40824	69.2557
Replicate 1	N	8	0.195312	0.195312	-6.70927	-6.70927	32.0388
Replicate 1	N	9	0.0976562	0.0976562	-7.0103	-7.0103	14.2395
Replicate 1	N	10	0.0488281	0.0488281	-7.31133	-7.31133	25.5663
Replicate 1	N	11	0.0244141	0.0244141	-7.61236	-7.61236	12.6214
Replicate 1	N	12	0.012207	0.012207	-7.91339	-7.91339	17.4757
Replicate 1	N	13	25	25	-4.60206	-4.60206	88.6731
Replicate 1	N	14	12.5	12.5	-4.90309	-4.90309	96.7638
Replicate 1	N	15	6.25	6.25	-5.20412	-5.20412	90.2913
Replicate 1	N	16	3.125	3.125	-5.50515	-5.50515	91.9094
Replicate 1	N	17	1.5625	1.5625	-5.80618	-5.80618	74.11
Replicate 1	N	18	0.78125	0.78125	-6.10721	-6.10721	75.7282
Replicate 1	N	19	0.390625	0.390625	-6.40824	-6.40824	53.0744
Replicate 1	N	20	0.195312	0.195312	-6.70927	-6.70927	74.11
Replicate 1	N	21	0.0976562	0.0976562	-7.0103	-7.0103	51.4563
Replicate 1	N	22	0.0488281	0.0488281	-7.31133	-7.31133	20.712
Replicate 1	N	23	0.0244141	0.0244141	-7.61236	-7.61236	51.4563
Replicate 1	N	24	0.012207	0.012207	-7.91339	-7.91339	64.4013
Replicate 2	A	1	50	0	-4.30103	0	96.8346
Replicate 2	A	2	25	0	-4.60206	0	99.3669
Replicate 2	A	3	12.5	0	-4.90309	0	96.8346
Replicate 2	A	4	6.25	0	-5.20412	0	94.3023
Replicate 2	A	5	3.125	0	-5.50515	0	90.5038
Replicate 2	A	6	1.5625	0	-5.80618	0	82.2738
Replicate 2	A	7	0.78125	0	-6.10721	0	63.9145
Replicate 2	A	8	0.390625	0	-6.40824	0	26.5629
Replicate 2	A	9	0.195312	0	-6.70927	0	-0.0263783
Replicate 2	A	10	0.0976562	0	-7.0103	0	-17.1195
Replicate 2	A	11	0.0488281	0	-7.31133	0	-25.3495
Replicate 2	A	12	0.0244141	0	-7.61236	0	-17.7526
Replicate 2	A	13	50	0	-4.30103	0	95.5685
Replicate 2	A	14	25	0	-4.60206	0	99.3669
Replicate 2	A	15	12.5	0	-4.90309	0	98.1008
Replicate 2	A	16	6.25	0	-5.20412	0	95.5685
Replicate 2	A	17	3.125	0	-5.50515	0	94.3023
Replicate 2	A	18	1.5625	0	-5.80618	0	85.4392
Replicate 2	A	19	0.78125	0	-6.10721	0	81.0076
Replicate 2	A	20	0.390625	0	-6.40824	0	39.2245
Replicate 2	A	21	0.195312	0	-6.70927	0	19.5991
Replicate 2	A	22	0.0976562	0	-7.0103	0	3.13901
Replicate 2	A	23	0.0488281	0	-7.31133	0	-12.6879
Replicate 2	A	24	0.0244141	0	-7.61236	0	-13.321
Replicate 2	B	1	0	50	0	-4.30103	8.83672
Replicate 2	B	2	0	25	0	-4.60206	12.6352
Replicate 2	B	3	0	12.5	0	-4.90309	2.50594
Replicate 2	B	4	0	6.25	0	-5.20412	17.6998
Replicate 2	B	5	0	3.125	0	-5.50515	-12.0549
Replicate 2	B	6	0	1.5625	0	-5.80618	-14.5872
Replicate 2	B	7	0	0.78125	0	-6.10721	-16.4864
Replicate 2	B	8	0	0.390625	0	-6.40824	-11.4218
Replicate 2	B	9	0	0.195312	0	-6.70927	-21.551
Replicate 2	B	10	0	0.0976562	0	-7.0103	-25.9826
Replicate 2	B	11	0	0.0488281	0	-7.31133	-19.6518
Replicate 2	B	12	0	0.0244141	0	-7.61236	3.77209
Replicate 2	B	13	0	50	0	-4.30103	-3.82485
Replicate 2	B	14	0	25	0	-4.60206	-20.918
Replicate 2	B	15	0	12.5	0	-4.90309	-21.551
Replicate 2	B	16	0	6.25	0	-5.20412	-12.6879
Replicate 2	B	17	0	3.125	0	-5.50515	-16.4864
Replicate 2	B	18	0	1.5625	0	-5.80618	-17.1195
Replicate 2	B	19	0	0.78125	0	-6.10721	-0.659457
Replicate 2	B	20	0	0.390625	0	-6.40824	16.4337
Replicate 2	B	21	0	0.195312	0	-6.70927	4.40517
Replicate 2	B	22	0	0.0976562	0	-7.0103	-10.1556
Replicate 2	B	23	0	0.0488281	0	-7.31133	-3.19177
Replicate 2	B	24	0	0.0244141	0	-7.61236	-3.82485
Replicate 2	C	1	45.5	4.5	-4.34199	-5.34679	100
Replicate 2	C	2	22.75	2.25	-4.64302	-5.64782	97.4677
Replicate 2	C	3	11.375	1.125	-4.94405	-5.94885	100
Replicate 2	C	4	5.6875	0.5625	-5.24508	-6.24988	96.2015
Replicate 2	C	5	2.84375	0.28125	-5.54611	-6.55091	97.4677
Replicate 2	C	6	1.42188	0.140625	-5.84714	-6.85194	91.1369
Replicate 2	C	7	0.710938	0.0703125	-6.14817	-7.15297	82.9069
Replicate 2	C	8	0.355469	0.0351562	-6.4492	-7.454	40.4906
Replicate 2	C	9	0.177734	0.0175781	-6.75023	-7.75503	5.67133
Replicate 2	C	10	0.0888672	0.00878906	-7.05126	-8.05606	-12.0549
Replicate 2	C	11	0.0444336	0.00439453	-7.35229	-8.35709	12.0021
Replicate 2	C	12	0.0222168	0.00219727	-7.65332	-8.65812	-19.0187
Replicate 2	C	13	45.5	4.5	-4.34199	-5.34679	95.5685
Replicate 2	C	14	22.75	2.25	-4.64302	-5.64782	99.3669
Replicate 2	C	15	11.375	1.125	-4.94405	-5.94885	99.3669
Replicate 2	C	16	5.6875	0.5625	-5.24508	-6.24988	96.8346
Replicate 2	C	17	2.84375	0.28125	-5.54611	-6.55091	95.5685
Replicate 2	C	18	1.42188	0.140625	-5.84714	-6.85194	89.8707
Replicate 2	C	19	0.710938	0.0703125	-6.14817	-7.15297	75.3099
Replicate 2	C	20	0.355469	0.0351562	-6.4492	-7.454	58.8499
Replicate 2	C	21	0.177734	0.0175781	-6.75023	-7.75503	18.966
Replicate 2	C	22	0.0888672	0.00878906	-7.05126	-8.05606	20.8652
Replicate 2	C	23	0.0444336	0.00439453	-7.35229	-8.35709	6.30441
Replicate 2	C	24	0.0222168	0.00219727	-7.65332	-8.65812	-2.55869
Replicate 2	D	1	4.5	45.5	-5.34679	-4.34199	84.173
Replicate 2	D	2	2.25	22.75	-5.64782	-4.64302	90.5038
Replicate 2	D	3	1.125	11.375	-5.94885	-4.94405	82.2738
Replicate 2	D	4	0.5625	5.6875	-6.24988	-5.24508	65.8138
Replicate 2	D	5	0.28125	2.84375	-6.55091	-5.54611	46.8214
Replicate 2	D	6	0.140625	1.42188	-6.85194	-5.84714	24.6637
Replicate 2	D	7	0.0703125	0.710938	-7.15297	-6.14817	11.369
Replicate 2	D	8	0.0351562	0.355469	-7.454	-6.4492	-0.0263783
Replicate 2	D	9	0.0175781	0.177734	-7.75503	-6.75023	-29.148
Replicate 2	D	10	0.00878906	0.0888672	-8.05606	-7.05126	-14.5872
Replicate 2	D	11	0.00439453	0.0444336	-8.35709	-7.35229	1.87286
Replicate 2	D	12	0.00219727	0.0222168	-8.65812	-7.65332	-2.55869
Replicate 2	D	13	4.5	45.5	-5.34679	-4.34199	89.8707
Replicate 2	D	14	2.25	22.75	-5.64782	-4.64302	95.5685
Replicate 2	D	15	1.125	11.375	-5.94885	-4.94405	89.8707
Replicate 2	D	16	0.5625	5.6875	-6.24988	-5.24508	75.943
Replicate 2	D	17	0.28125	2.84375	-6.55091	-5.54611	47.4545
Replicate 2	D	18	0.140625	1.42188	-6.85194	-5.84714	15.8006
Replicate 2	D	19	0.0703125	0.710938	-7.15297	-6.14817	20.8652
Replicate 2	D	20	0.0351562	0.355469	-7.454	-6.4492	-19.6518
Replicate 2	D	21	0.0175781	0.177734	-7.75503	-6.75023	20.2321
Replicate 2	D	22	0.00878906	0.0888672	-8.05606	-7.05126	25.9298
Replicate 2	D	23	0.00439453	0.0444336	-8.35709	-7.35229	0.6067
Replicate 2	D	24	0.00219727	0.0222168	-8.65812	-7.65332	3.77209
Replicate 2	E	1	44.5	5.5	-4.35164	-5.25964	96.2015
Replicate 2	E	2	22.25	2.75	-4.65267	-5.56067	98.1008
Replicate 2	E	3	11.125	1.375	-4.9537	-5.8617	99.3669
Replicate 2	E	4	5.5625	0.6875	-5.25473	-6.16273	97.4677
Replicate 2	E	5	2.78125	0.34375	-5.55576	-6.46376	94.9354
Replicate 2	E	6	1.39062	0.171875	-5.85679	-6.76479	88.6046
Replicate 2	E	7	0.695312	0.0859375	-6.15782	-7.06582	75.943
Replicate 2	E	8	0.347656	0.0429688	-6.45885	-7.36685	34.7929
Replicate 2	E	9	0.173828	0.0214844	-6.75988	-7.66788	11.369
Replicate 2	E	10	0.0869141	0.0107422	-7.06091	-7.96891	3.77209
Replicate 2	E	11	0.043457	0.00537109	-7.36194	-8.26994	5.03825
Replicate 2	E	12	0.0217285	0.00268555	-7.66297	-8.57097	0.6067
Replicate 2	E	13	44.5	5.5	-4.35164	-5.25964	98.7338
Replicate 2	E	14	22.25	2.75	-4.65267	-5.56067	98.1008
Replicate 2	E	15	11.125	1.375	-4.9537	-5.8617	96.8346
Replicate 2	E	16	5.5625	0.6875	-5.25473	-6.16273	99.3669
Replicate 2	E	17	2.78125	0.34375	-5.55576	-6.46376	93.6692
Replicate 2	E	18	1.39062	0.171875	-5.85679	-6.76479	84.8061
Replicate 2	E	19	0.695312	0.0859375	-6.15782	-7.06582	81.0076
Replicate 2	E	20	0.347656	0.0429688	-6.45885	-7.36685	48.7207
Replicate 2	E	21	0.173828	0.0214844	-6.75988	-7.66788	12.6352
Replicate 2	E	22	0.0869141	0.0107422	-7.06091	-7.96891	20.8652
Replicate 2	E	23	0.043457	0.00537109	-7.36194	-8.26994	11.369
Replicate 2	E	24	0.0217285	0.00268555	-7.66297	-8.57097	15.1675
Replicate 2	F	1	5.5	44.5	-5.25964	-4.35164	92.4031
Replicate 2	F	2	2.75	22.25	-5.56067	-4.65267	92.4031
Replicate 2	F	3	1.375	11.125	-5.8617	-4.9537	83.54
Replicate 2	F	4	0.6875	5.5625	-6.16273	-5.25473	83.54
Replicate 2	F	5	0.34375	2.78125	-6.46376	-5.55576	64.5476
Replicate 2	F	6	0.171875	1.39062	-6.76479	-5.85679	36.6922
Replicate 2	F	7	0.0859375	0.695312	-7.06582	-6.15782	27.196
Replicate 2	F	8	0.0429688	0.347656	-7.36685	-6.45885	4.40517
Replicate 2	F	9	0.0214844	0.173828	-7.66788	-6.75988	-10.1556
Replicate 2	F	10	0.0107422	0.0869141	-7.96891	-7.06091	-0.659457
Replicate 2	F	11	0.00537109	0.043457	-8.26994	-7.36194	5.03825
Replicate 2	F	12	0.00268555	0.0217285	-8.57097	-7.66297	-3.82485
Replicate 2	F	13	5.5	44.5	-5.25964	-4.35164	94.3023
Replicate 2	F	14	2.75	22.25	-5.56067	-4.65267	96.8346
Replicate 2	F	15	1.375	11.125	-5.8617	-4.9537	93.0361
Replicate 2	F	16	0.6875	5.5625	-6.16273	-5.25473	81.6407
Replicate 2	F	17	0.34375	2.78125	-6.46376	-5.55576	54.4184
Replicate 2	F	18	0.171875	1.39062	-6.76479	-5.85679	41.1237
Replicate 2	F	19	0.0859375	0.695312	-7.06582	-6.15782	12.6352
Replicate 2	F	20	0.0429688	0.347656	-7.36685	-6.45885	-16.4864
Replicate 2	F	21	0.0214844	0.173828	-7.66788	-6.75988	-6.99024
Replicate 2	F	22	0.0107422	0.0869141	-7.96891	-7.06091	12.6352
Replicate 2	F	23	0.00537109	0.043457	-8.26994	-7.36194	-13.9541
Replicate 2	F	24	0.00268555	0.0217285	-8.57097	-7.66297	-13.9541
Replicate 2	G	1	42.75	7.25	-4.36906	-5.13966	98.7338
Replicate 2	G	2	21.375	3.625	-4.67009	-5.44069	98.1008
Replicate 2	G	3	10.6875	1.8125	-4.97112	-5.74172	94.9354
Replicate 2	G	4	5.34375	0.90625	-5.27215	-6.04275	96.8346
Replicate 2	G	5	2.67188	0.453125	-5.57318	-6.34378	93.0361
Replicate 2	G	6	1.33594	0.226562	-5.87421	-6.64481	89.2377
Replicate 2	G	7	0.667969	0.113281	-6.17524	-6.94584	79.7415
Replicate 2	G	8	0.333984	0.0566406	-6.47627	-7.24687	34.7929
Replicate 2	G	9	0.166992	0.0283203	-6.7773	-7.5479	34.1599
Replicate 2	G	10	0.0834961	0.0141602	-7.07833	-7.84893	-5.72408
Replicate 2	G	11	0.041748	0.00708008	-7.37936	-8.14996	-1.92561
Replicate 2	G	12	0.020874	0.00354004	-7.68039	-8.45099	-5.72408
Replicate 2	G	13	42.75	7.25	-4.36906	-5.13966	97.4677
Replicate 2	G	14	21.375	3.625	-4.67009	-5.44069	98.7338
Replicate 2	G	15	10.6875	1.8125	-4.97112	-5.74172	98.7338
Replicate 2	G	16	5.34375	0.90625	-5.27215	-6.04275	99.3669
Replicate 2	G	17	2.67188	0.453125	-5.57318	-6.34378	93.6692
Replicate 2	G	18	1.33594	0.226562	-5.87421	-6.64481	91.77
Replicate 2	G	19	0.667969	0.113281	-6.17524	-6.94584	73.4107
Replicate 2	G	20	0.333984	0.0566406	-6.47627	-7.24687	55.0514
Replicate 2	G	21	0.166992	0.0283203	-6.7773	-7.5479	22.7644
Replicate 2	G	22	0.0834961	0.0141602	-7.07833	-7.84893	18.966
Replicate 2	G	23	0.041748	0.00708008	-7.37936	-8.14996	18.3329
Replicate 2	G	24	0.020874	0.00354004	-7.68039	-8.45099	20.8652
Replicate 2	H	1	7.25	42.75	-5.13966	-4.36906	91.77
Replicate 2	H	2	3.625	21.375	-5.44069	-4.67009	92.4031
Replicate 2	H	3	1.8125	10.6875	-5.74172	-4.97112	92.4031
Replicate 2	H	4	0.90625	5.34375	-6.04275	-5.27215	82.2738
Replicate 2	H	5	0.453125	2.67188	-6.34378	-5.57318	75.943
Replicate 2	H	6	0.226562	1.33594	-6.64481	-5.87421	62.6484
Replicate 2	H	7	0.113281	0.667969	-6.94584	-6.17524	29.7283
Replicate 2	H	8	0.0566406	0.333984	-7.24687	-6.47627	30.3614
Replicate 2	H	9	0.0283203	0.166992	-7.5479	-6.7773	-3.82485
Replicate 2	H	10	0.0141602	0.0834961	-7.84893	-7.07833	-20.2849
Replicate 2	H	11	0.00708008	0.041748	-8.14996	-7.37936	-12.6879
Replicate 2	H	12	0.00354004	0.020874	-8.45099	-7.68039	-3.19177
Replicate 2	H	13	7.25	42.75	-5.13966	-4.36906	89.2377
Replicate 2	H	14	3.625	21.375	-5.44069	-4.67009	98.1008
Replicate 2	H	15	1.8125	10.6875	-5.74172	-4.97112	93.0361
Replicate 2	H	16	0.90625	5.34375	-6.04275	-5.27215	85.4392
Replicate 2	H	17	0.453125	2.67188	-6.34378	-5.57318	64.5476
Replicate 2	H	18	0.226562	1.33594	-6.64481	-5.87421	26.5629
Replicate 2	H	19	0.113281	0.667969	-6.94584	-6.17524	13.2683
Replicate 2	H	20	0.0566406	0.333984	-7.24687	-6.47627	12.6352
Replicate 2	H	21	0.0283203	0.166992	-7.5479	-6.7773	-13.9541
Replicate 2	H	22	0.0141602	0.0834961	-7.84893	-7.07833	2.50594
Replicate 2	H	23	0.00708008	0.041748	-8.14996	-7.37936	25.2968
Replicate 2	H	24	0.00354004	0.020874	-8.45099	-7.68039	21.4983
Replicate 2	I	1	40	10	-4.39794	-5	98.7338
Replicate 2	I	2	20	5	-4.69897	-5.30103	96.2015
Replicate 2	I	3	10	2.5	-5	-5.60206	98.7338
Replicate 2	I	4	5	1.25	-5.30103	-5.90309	99.3669
Replicate 2	I	5	2.5	0.625	-5.60206	-6.20412	96.2015
Replicate 2	I	6	1.25	0.3125	-5.90309	-6.50515	87.9715
Replicate 2	I	7	0.625	0.15625	-6.20412	-6.80618	87.3384
Replicate 2	I	8	0.3125	0.078125	-6.50515	-7.10721	49.9868
Replicate 2	I	9	0.15625	0.0390625	-6.80618	-7.40824	25.9298
Replicate 2	I	10	0.078125	0.0195312	-7.10721	-7.70927	7.57056
Replicate 2	I	11	0.0390625	0.00976562	-7.40824	-8.0103	-19.6518
Replicate 2	I	12	0.0195312	0.00488281	-7.70927	-8.31133	-22.8172
Replicate 2	I	13	40	10	-4.39794	-5	96.8346
Replicate 2	I	14	20	5	-4.69897	-5.30103	100
Replicate 2	I	15	10	2.5	-5	-5.60206	96.8346
Replicate 2	I	16	5	1.25	-5.30103	-5.90309	96.2015
Replicate 2	I	17	2.5	0.625	-5.60206	-6.20412	96.8346
Replicate 2	I	18	1.25	0.3125	-5.90309	-6.50515	89.8707
Replicate 2	I	19	0.625	0.15625	-6.20412	-6.80618	60.1161
Replicate 2	I	20	0.3125	0.078125	-6.50515	-7.10721	34.1599
Replicate 2	I	21	0.15625	0.0390625	-6.80618	-7.40824	21.4983
Replicate 2	I	22	0.078125	0.0195312	-7.10721	-7.70927	16.4337
Replicate 2	I	23	0.0390625	0.00976562	-7.40824	-8.0103	13.9013
Replicate 2	I	24	0.0195312	0.00488281	-7.70927	-8.31133	8.83672
Replicate 2	J	1	10	40	-5	-4.39794	92.4031
Replicate 2	J	2	5	20	-5.30103	-4.69897	93.6692
Replicate 2	J	3	2.5	10	-5.60206	-5	96.2015
Replicate 2	J	4	1.25	5	-5.90309	-5.30103	93.6692
Replicate 2	J	5	0.625	2.5	-6.20412	-5.60206	85.4392
Replicate 2	J	6	0.3125	1.25	-6.50515	-5.90309	52.5191
Replicate 2	J	7	0.15625	0.625	-6.80618	-6.20412	43.0229
Replicate 2	J	8	0.078125	0.3125	-7.10721	-6.50515	34.7929
Replicate 2	J	9	0.0390625	0.15625	-7.40824	-6.80618	15.1675
Replicate 2	J	10	0.0195312	0.078125	-7.70927	-7.10721	13.2683
Replicate 2	J	11	0.00976562	0.0390625	-8.0103	-7.40824	28.4621
Replicate 2	J	12	0.00488281	0.0195312	-8.31133	-7.70927	-1.29253
Replicate 2	J	13	10	40	-5	-4.39794	96.8346
Replicate 2	J	14	5	20	-5.30103	-4.69897	95.5685
Replicate 2	J	15	2.5	10	-5.60206	-5	97.4677
Replicate 2	J	16	1.25	5	-5.90309	-5.30103	93.6692
Replicate 2	J	17	0.625	2.5	-6.20412	-5.60206	77.2092
Replicate 2	J	18	0.3125	1.25	-6.50515	-5.90309	60.1161
Replicate 2	J	19	0.15625	0.625	-6.80618	-6.20412	25.2968
Replicate 2	J	20	0.078125	0.3125	-7.10721	-6.50515	11.369
Replicate 2	J	21	0.0390625	0.15625	-7.40824	-6.80618	18.3329
Replicate 2	J	22	0.0195312	0.078125	-7.70927	-7.10721	24.0306
Replicate 2	J	23	0.00976562	0.0390625	-8.0103	-7.40824	19.5991
Replicate 2	J	24	0.00488281	0.0195312	-8.31133	-7.70927	31.6275
Replicate 2	K	1	33.25	16.75	-4.47821	-4.77599	98.7338
Replicate 2	K	2	16.625	8.375	-4.77924	-5.07702	98.1008
Replicate 2	K	3	8.3125	4.1875	-5.08027	-5.37805	97.4677
Replicate 2	K	4	4.15625	2.09375	-5.3813	-5.67908	94.9354
Replicate 2	K	5	2.07812	1.04688	-5.68233	-5.98011	96.8346
Replicate 2	K	6	1.03906	0.523438	-5.98336	-6.28114	94.9354
Replicate 2	K	7	0.519531	0.261719	-6.28439	-6.58217	83.54
Replicate 2	K	8	0.259766	0.130859	-6.58542	-6.8832	46.1883
Replicate 2	K	9	0.129883	0.0654297	-6.88645	-7.18423	17.6998
Replicate 2	K	10	0.0649414	0.0327148	-7.18748	-7.48526	-19.6518
Replicate 2	K	11	0.0324707	0.0163574	-7.48851	-7.78629	-13.321
Replicate 2	K	12	0.0162354	0.00817871	-7.78954	-8.08732	3.77209
Replicate 2	K	13	33.25	16.75	-4.47821	-4.77599	100
Replicate 2	K	14	16.625	8.375	-4.77924	-5.07702	99.3669
Replicate 2	K	15	8.3125	4.1875	-5.08027	-5.37805	96.8346
Replicate 2	K	16	4.15625	2.09375	-5.3813	-5.67908	94.9354
Replicate 2	K	17	2.07812	1.04688	-5.68233	-5.98011	96.2015
Replicate 2	K	18	1.03906	0.523438	-5.98336	-6.28114	84.8061
Replicate 2	K	19	0.519531	0.261719	-6.28439	-6.58217	70.8784
Replicate 2	K	20	0.259766	0.130859	-6.58542	-6.8832	53.7853
Replicate 2	K	21	0.129883	0.0654297	-6.88645	-7.18423	22.1314
Replicate 2	K	22	0.0649414	0.0327148	-7.18748	-7.48526	13.2683
Replicate 2	K	23	0.0324707	0.0163574	-7.48851	-7.78629	15.8006
Replicate 2	K	24	0.0162354	0.00817871	-7.78954	-8.08732	22.7644
Replicate 2	L	1	16.75	33.25	-4.77599	-4.47821	98.1008
Replicate 2	L	2	8.375	16.625	-5.07702	-4.77924	98.7338
Replicate 2	L	3	4.1875	8.3125	-5.37805	-5.08027	98.7338
Replicate 2	L	4	2.09375	4.15625	-5.67908	-5.3813	100
Replicate 2	L	5	1.04688	2.07812	-5.98011	-5.68233	94.9354
Replicate 2	L	6	0.523438	1.03906	-6.28114	-5.98336	75.3099
Replicate 2	L	7	0.261719	0.519531	-6.58217	-6.28439	64.5476
Replicate 2	L	8	0.130859	0.259766	-6.8832	-6.58542	13.9013
Replicate 2	L	9	0.0654297	0.129883	-7.18423	-6.88645	13.9013
Replicate 2	L	10	0.0327148	0.0649414	-7.48526	-7.18748	-18.3857
Replicate 2	L	11	0.0163574	0.0324707	-7.78629	-7.48851	7.57056
Replicate 2	L	12	0.00817871	0.0162354	-8.08732	-7.78954	3.13901
Replicate 2	L	13	16.75	33.25	-4.77599	-4.47821	98.1008
Replicate 2	L	14	8.375	16.625	-5.07702	-4.77924	99.3669
Replicate 2	L	15	4.1875	8.3125	-5.37805	-5.08027	98.1008
Replicate 2	L	16	2.09375	4.15625	-5.67908	-5.3813	98.7338
Replicate 2	L	17	1.04688	2.07812	-5.98011	-5.68233	86.0723
Replicate 2	L	18	0.523438	1.03906	-6.28114	-5.98336	73.4107
Replicate 2	L	19	0.261719	0.519531	-6.58217	-6.28439	50.6199
Replicate 2	L	20	0.130859	0.259766	-6.8832	-6.58542	15.8006
Replicate 2	L	21	0.0654297	0.129883	-7.18423	-6.88645	2.50594
Replicate 2	L	22	0.0327148	0.0649414	-7.48526	-7.18748	22.1314
Replicate 2	L	23	0.0163574	0.0324707	-7.78629	-7.48851	13.2683
Replicate 2	L	24	0.00817871	0.0162354	-8.08732	-7.78954	22.1314
Replicate 2	M	1	25	25	-4.60206	-4.60206	100
Replicate 2	M	2	12.5	12.5	-4.90309	-4.90309	97.4677
Replicate 2	M	3	6.25	6.25	-5.20412	-5.20412	98.1008
Replicate 2	M	4	3.125	3.125	-5.50515	-5.50515	96.8346
Replicate 2	M	5	1.5625	1.5625	-5.80618	-5.80618	93.6692
Replicate 2	M	6	0.78125	0.78125	-6.10721	-6.10721	85.4392
Replicate 2	M	7	0.390625	0.390625	-6.40824	-6.40824	53.7853
Replicate 2	M	8	0.195312	0.195312	-6.70927	-6.70927	22.7644
Replicate 2	M	9	0.0976562	0.0976562	-7.0103	-7.0103	13.2683
Replicate 2	M	10	0.0488281	0.0488281	-7.31133	-7.31133	77.2092
Replicate 2	M	11	0.0244141	0.0244141	-7.61236	-7.61236	8.20364
Replicate 2	M	12	0.012207	0.012207	-7.91339	-7.91339	-13.9541
Replicate 2	M	13	25	25	-4.60206	-4.60206	97.4677
Replicate 2	M	14	12.5	12.5	-4.90309	-4.90309	98.1008
Replicate 2	M	15	6.25	6.25	-5.20412	-5.20412	98.7338
Replicate 2	M	16	3.125	3.125	-5.50515	-5.50515	96.8346
Replicate 2	M	17	1.5625	1.5625	-5.80618	-5.80618	93.6692
Replicate 2	M	18	0.78125	0.78125	-6.10721	-6.10721	75.943
Replicate 2	M	19	0.390625	0.390625	-6.40824	-6.40824	56.9507
Replicate 2	M	20	0.195312	0.195312	-6.70927	-6.70927	28.4621
Replicate 2	M	21	0.0976562	0.0976562	-7.0103	-7.0103	6.93748
Replicate 2	M	22	0.0488281	0.0488281	-7.31133	-7.31133	1.23978
Replicate 2	M	23	0.0244141	0.0244141	-7.61236	-7.61236	4.40517
Replicate 2	M	24	0.012207	0.012207	-7.91339	-7.91339	-2.55869
Replicate 2	N	1	25	25	-4.60206	-4.60206	98.1008
Replicate 2	N	2	12.5	12.5	-4.90309	-4.90309	99.3669
Replicate 2	N	3	6.25	6.25	-5.20412	-5.20412	96.2015
Replicate 2	N	4	3.125	3.125	-5.50515	-5.50515	97.4677
Replicate 2	N	5	1.5625	1.5625	-5.80618	-5.80618	93.0361
Replicate 2	N	6	0.78125	0.78125	-6.10721	-6.10721	85.4392
Replicate 2	N	7	0.390625	0.390625	-6.40824	-6.40824	65.1807
Replicate 2	N	8	0.195312	0.195312	-6.70927	-6.70927	34.1599
Replicate 2	N	9	0.0976562	0.0976562	-7.0103	-7.0103	22.7644
Replicate 2	N	10	0.0488281	0.0488281	-7.31133	-7.31133	15.8006
Replicate 2	N	11	0.0244141	0.0244141	-7.61236	-7.61236	-15.2203
Replicate 2	N	12	0.012207	0.012207	-7.91339	-7.91339	1.87286
Replicate 2	N	13	25	25	-4.60206	-4.60206	97.4677
Replicate 2	N	14	12.5	12.5	-4.90309	-4.90309	98.7338
Replicate 2	N	15	6.25	6.25	-5.20412	-5.20412	98.1008
Replicate 2	N	16	3.125	3.125	-5.50515	-5.50515	97.4677
Replicate 2	N	17	1.5625	1.5625	-5.80618	-5.80618	91.1369
Replicate 2	N	18	0.78125	0.78125	-6.10721	-6.10721	81.6407
Replicate 2	N	19	0.390625	0.390625	-6.40824	-6.40824	60.7491
Replicate 2	N	20	0.195312	0.195312	-6.70927	-6.70927	39.8576
Replicate 2	N	21	0.0976562	0.0976562	-7.0103	-7.0103	10.1029
Replicate 2	N	22	0.0488281	0.0488281	-7.31133	-7.31133	30.3614
Replicate 2	N	23	0.0244141	0.0244141	-7.61236	-7.61236	6.93748
Replicate 2	N	24	0.012207	0.012207	-7.91339	-7.91339	29.7283
