# Supplementary material for: A drug repurposing approach reveals targetable epigenetic pathways in Plasmodium vivax hypnozoites
Source: eLife. 2025 Sep 30;13:RP98221. doi: 10.7554/eLife.98221 (PMC12483515; doi:10.7554/eLife.98221)
Supplement: Figure 3—source data 1. [file elife-98221-fig3-data1.xlsx]

## Sheet: Figure3-HCI
High content imaging object list for Figure 3B and Figure 3--figure supplement 4. Liver stage cultures from three different P. vivax cases were fixed at six days post-infection and stained for either 5-methylcytosine (5mC) or 5-hydroxymethylcytosine (5hmC). 5mC/5hmC area mask is measurement of area of positive signal inside each parasite's 2-dimensional area. Parasites under 125 μm2 were classifi…
P. vivax Case	Primary Stain	rPvUIS4: Individual Parasite Area (um2)	5mC/5hmC Signal: Mask Area (um2)
Case 1	5mC	41.5204	0
Case 1	5mC	45.3055	0
Case 1	5mC	47.9435	0
Case 1	5mC	52.1873	0
Case 1	5mC	52.8755	0
Case 1	5mC	53.7931	0
Case 1	5mC	55.1694	0
Case 1	5mC	60.9043	0
Case 1	5mC	65.951	0
Case 1	5mC	66.9833	0
Case 1	5mC	72.1446	0
Case 1	5mC	73.4063	0
Case 1	5mC	75.0121	0
Case 1	5mC	90.955	0
Case 1	5mC	91.1844	0
Case 1	5mC	92.6755	0
Case 1	5mC	97.6075	0
Case 1	5mC	98.6397	0
Case 1	5mC	98.7544	0
Case 1	5mC	101.622	0
Case 1	5mC	102.998	0
Case 1	5mC	153.236	0
Case 1	5mC	158.512	0
Case 1	5mC	207.717	0
Case 1	5mC	220.563	0
Case 1	5mC	299.59	0
Case 1	5mC	304.636	0
Case 1	5mC	53.7931	0.114697
Case 1	5mC	52.4167	0.114697
Case 1	5mC	129.493	0.114697
Case 1	5mC	95.6576	0.114697
Case 1	5mC	79.1412	0.114697
Case 1	5mC	116.418	0.114697
Case 1	5mC	67.9008	0.229395
Case 1	5mC	96.4605	0.229395
Case 1	5mC	117.565	0.229395
Case 1	5mC	102.31	0.229395
Case 1	5mC	65.4922	0.229395
Case 1	5mC	75.5856	0.344092
Case 1	5mC	85.5642	0.344092
Case 1	5mC	48.517	0.344092
Case 1	5mC	66.8686	0.458789
Case 1	5mC	100.704	0.458789
Case 1	5mC	46.3377	0.458789
Case 1	5mC	96.8046	0.458789
Case 1	5mC	122.382	0.458789
Case 1	5mC	79.0265	0.573487
Case 1	5mC	275.274	0.573487
Case 1	5mC	104.145	0.573487
Case 1	5mC	74.4386	0.573487
Case 1	5mC	77.0766	0.573487
Case 1	5mC	68.0155	0.573487
Case 1	5mC	267.13	0.688184
Case 1	5mC	97.2634	0.688184
Case 1	5mC	59.1838	0.802882
Case 1	5mC	157.824	0.802882
Case 1	5mC	66.6392	0.802882
Case 1	5mC	71.5712	0.802882
Case 1	5mC	96.1164	0.802882
Case 1	5mC	103.457	0.917579
Case 1	5mC	107.816	0.917579
Case 1	5mC	54.4813	0.917579
Case 1	5mC	86.9406	0.917579
Case 1	5mC	54.3666	0.917579
Case 1	5mC	43.1262	0.917579
Case 1	5mC	56.8899	1.03228
Case 1	5mC	215.631	1.03228
Case 1	5mC	173.996	1.26167
Case 1	5mC	92.7902	1.14697
Case 1	5mC	77.6501	1.03228
Case 1	5mC	98.525	1.14697
Case 1	5mC	43.3556	1.14697
Case 1	5mC	51.3844	1.26167
Case 1	5mC	116.762	1.26167
Case 1	5mC	59.9867	1.14697
Case 1	5mC	88.317	1.26167
Case 1	5mC	59.9867	1.26167
Case 1	5mC	95.1988	1.37637
Case 1	5mC	58.1516	1.26167
Case 1	5mC	69.9654	1.37637
Case 1	5mC	86.2524	1.26167
Case 1	5mC	101.048	1.26167
Case 1	5mC	109.651	1.49107
Case 1	5mC	40.947	1.60576
Case 1	5mC	38.1942	1.37637
Case 1	5mC	164.82	1.60576
Case 1	5mC	76.7325	1.49107
Case 1	5mC	100.475	1.49107
Case 1	5mC	95.3135	1.60576
Case 1	5mC	53.449	1.49107
Case 1	5mC	65.6069	1.60576
Case 1	5mC	56.5458	1.72046
Case 1	5mC	59.6426	1.49107
Case 1	5mC	117.45	1.72046
Case 1	5mC	138.554	1.60576
Case 1	5mC	78.453	1.83516
Case 1	5mC	68.0155	1.60576
Case 1	5mC	40.8323	1.72046
Case 1	5mC	77.6501	1.72046
Case 1	5mC	68.4743	1.60576
Case 1	5mC	61.1337	1.72046
Case 1	5mC	69.0478	1.72046
Case 1	5mC	80.9763	1.60576
Case 1	5mC	56.8899	1.72046
Case 1	5mC	180.763	1.94985
Case 1	5mC	54.1372	1.49107
Case 1	5mC	76.6178	1.37637
Case 1	5mC	202.326	1.94985
Case 1	5mC	107.357	1.72046
Case 1	5mC	67.6714	1.72046
Case 1	5mC	88.5464	1.94985
Case 1	5mC	92.3314	1.83516
Case 1	5mC	64.0011	1.83516
Case 1	5mC	140.504	2.06455
Case 1	5mC	51.155	1.83516
Case 1	5mC	65.0334	2.06455
Case 1	5mC	74.8974	1.83516
Case 1	5mC	110.568	2.06455
Case 1	5mC	76.8472	2.17925
Case 1	5mC	106.21	2.06455
Case 1	5mC	62.8542	2.17925
Case 1	5mC	47.0259	2.06455
Case 1	5mC	78.3383	2.17925
Case 1	5mC	181.795	2.29395
Case 1	5mC	719.497	2.40864
Case 1	5mC	97.6075	2.06455
Case 1	5mC	85.3348	2.17925
Case 1	5mC	375.749	2.52334
Case 1	5mC	68.0155	2.52334
Case 1	5mC	66.8686	2.40864
Case 1	5mC	51.9579	2.29395
Case 1	5mC	51.0403	1.94985
Case 1	5mC	164.705	2.75274
Case 1	5mC	49.7787	2.75274
Case 1	5mC	87.9729	2.75274
Case 1	5mC	91.8726	2.52334
Case 1	5mC	237.079	2.86743
Case 1	5mC	117.909	2.75274
Case 1	5mC	83.7291	2.29395
Case 1	5mC	125.364	2.86743
Case 1	5mC	122.267	2.29395
Case 1	5mC	73.7504	3.09683
Case 1	5mC	68.1302	3.21153
Case 1	5mC	180.878	2.86743
Case 1	5mC	178.928	3.32622
Case 1	5mC	68.3596	3.09683
Case 1	5mC	80.1735	3.44092
Case 1	5mC	158.741	3.44092
Case 1	5mC	191.201	4.12911
Case 1	5mC	110.912	3.67032
Case 1	5mC	65.6069	3.44092
Case 1	5mC	54.1372	3.21153
Case 1	5mC	138.21	3.55562
Case 1	5mC	271.374	3.89971
Case 1	5mC	61.8219	3.67032
Case 1	5mC	170.211	4.01441
Case 1	5mC	492.74	4.2438
Case 1	5mC	70.0801	4.3585
Case 1	5mC	127.314	4.01441
Case 1	5mC	201.064	4.3585
Case 1	5mC	64.9187	4.12911
Case 1	5mC	202.556	4.2438
Case 1	5mC	79.2559	4.4732
Case 1	5mC	123.3	3.78501
Case 1	5mC	113.321	4.12911
Case 1	5mC	172.849	4.58789
Case 1	5mC	136.834	4.12911
Case 1	5mC	90.3815	4.93199
Case 1	5mC	65.7216	4.70259
Case 1	5mC	105.522	4.93199
Case 1	5mC	125.479	4.2438
Case 1	5mC	177.093	4.81729
Case 1	5mC	87.5141	5.27608
Case 1	5mC	110.912	5.04668
Case 1	5mC	57.4634	4.58789
Case 1	5mC	127.888	4.93199
Case 1	5mC	107.93	5.04668
Case 1	5mC	95.6576	4.58789
Case 1	5mC	91.8726	5.04668
Case 1	5mC	103.228	4.58789
Case 1	5mC	116.533	4.70259
Case 1	5mC	148.648	5.73487
Case 1	5mC	110.798	6.30835
Case 1	5mC	84.3026	5.96426
Case 1	5mC	173.422	4.70259
Case 1	5mC	43.2409	5.96426
Case 1	5mC	238.8	6.53775
Case 1	5mC	228.248	6.88184
Case 1	5mC	146.01	5.84957
Case 1	5mC	250.155	6.99654
Case 1	5mC	132.59	5.39078
Case 1	5mC	96.5752	7.22593
Case 1	5mC	68.7037	6.07896
Case 1	5mC	60.7896	6.88184
Case 1	5mC	172.62	7.11124
Case 1	5mC	131.787	7.11124
Case 1	5mC	194.641	6.42305
Case 1	5mC	56.5458	7.45533
Case 1	5mC	71.4565	7.11124
Case 1	5mC	89.464	7.34063
Case 1	5mC	209.781	7.34063
Case 1	5mC	115.73	6.99654
Case 1	5mC	140.16	8.02882
Case 1	5mC	91.9873	8.02882
Case 1	5mC	154.497	7.57003
Case 1	5mC	198.656	8.02882
Case 1	5mC	210.814	7.91412
Case 1	5mC	115.615	9.86397
Case 1	5mC	89.464	8.02882
Case 1	5mC	150.139	8.02882
Case 1	5mC	148.189	8.25821
Case 1	5mC	121.235	8.48761
Case 1	5mC	224.692	8.717
Case 1	5mC	203.817	6.88184
Case 1	5mC	162.067	8.37291
Case 1	5mC	106.439	7.45533
Case 1	5mC	173.537	9.17579
Case 1	5mC	217.237	9.06109
Case 1	5mC	93.9371	8.717
Case 1	5mC	164.935	10.6669
Case 1	5mC	173.308	10.3228
Case 1	5mC	150.827	10.8963
Case 1	5mC	128.92	10.6669
Case 1	5mC	427.362	12.7314
Case 1	5mC	263.46	11.0109
Case 1	5mC	478.976	10.2081
Case 1	5mC	180.19	11.355
Case 1	5mC	480.926	12.2726
Case 1	5mC	105.636	13.3049
Case 1	5mC	107.586	12.7314
Case 1	5mC	250.04	13.1902
Case 1	5mC	336.407	13.5343
Case 1	5mC	176.863	12.1579
Case 1	5mC	195.559	12.3873
Case 1	5mC	63.7717	12.6167
Case 1	5mC	232.033	12.8461
Case 1	5mC	96.8046	12.7314
Case 1	5mC	222.742	12.3873
Case 1	5mC	296.951	12.8461
Case 1	5mC	340.881	14.9107
Case 1	5mC	215.631	16.1723
Case 1	5mC	45.8789	19.4986
Case 1	5mC	132.82	15.0254
Case 1	5mC	143.257	15.8282
Case 1	5mC	99.4426	19.6133
Case 1	5mC	51.8432	22.366
Case 1	5mC	196.133	18.4663
Case 1	5mC	148.533	12.8461
Case 1	5mC	176.29	17.6634
Case 1	5mC	159.659	19.3839
Case 1	5mC	142.339	19.7279
Case 1	5mC	209.667	18.8104
Case 1	5mC	124.103	21.5631
Case 1	5mC	294.772	18.8104
Case 1	5mC	144.519	15.7135
Case 1	5mC	337.784	20.3014
Case 1	5mC	221.825	18.4663
Case 1	5mC	154.383	20.3014
Case 1	5mC	1552.31	22.9395
Case 1	5mC	40.3735	20.3014
Case 1	5mC	205.996	20.072
Case 1	5mC	668.8	26.6098
Case 1	5mC	278.485	21.7925
Case 1	5mC	159.2	21.6778
Case 1	5mC	247.173	23.1689
Case 1	5mC	290.299	27.7568
Case 1	5mC	83.6144	28.3302
Case 1	5mC	133.393	23.2836
Case 1	5mC	126.282	22.8248
Case 1	5mC	476.338	30.3948
Case 1	5mC	125.938	22.366
Case 1	5mC	592.297	31.3124
Case 1	5mC	115.5	32.9181
Case 1	5mC	363.017	36.7032
Case 1	5mC	284.449	40.1441
Case 1	5mC	102.884	36.2444
Case 1	5mC	85.5642	34.9827
Case 1	5mC	123.988	39.5706
Case 1	5mC	981.924	54.94
Case 1	5mC	184.663	40.8323
Case 1	5mC	300.622	76.5031
Case 1	5mC	427.362	69.5066
Case 1	5mC	104.719	103.113
Case 1	5mC	949.58	113.894
Case 1	5mC	644.599	132.246
Case 1	5mC	122.841	122.841
Case 1	5hmC	41.6351	0
Case 1	5hmC	43.585	0
Case 1	5hmC	44.0438	0
Case 1	5hmC	45.5349	0
Case 1	5hmC	45.8789	0
Case 1	5hmC	48.8611	0
Case 1	5hmC	48.9758	0
Case 1	5hmC	49.4346	0
Case 1	5hmC	49.8934	0
Case 1	5hmC	50.1227	0
Case 1	5hmC	51.155	0
Case 1	5hmC	51.6138	0
Case 1	5hmC	51.7285	0
Case 1	5hmC	53.1049	0
Case 1	5hmC	54.0225	0
Case 1	5hmC	54.0225	0
Case 1	5hmC	54.1372	0
Case 1	5hmC	54.4813	0
Case 1	5hmC	55.1694	0
Case 1	5hmC	56.5458	0
Case 1	5hmC	56.6605	0
Case 1	5hmC	56.6605	0
Case 1	5hmC	56.8899	0
Case 1	5hmC	58.381	0
Case 1	5hmC	59.2985	0
Case 1	5hmC	59.9867	0
Case 1	5hmC	61.5925	0
Case 1	5hmC	62.2807	0
Case 1	5hmC	62.8542	0
Case 1	5hmC	62.8542	0
Case 1	5hmC	63.0836	0
Case 1	5hmC	64.9187	0
Case 1	5hmC	65.2628	0
Case 1	5hmC	65.2628	0
Case 1	5hmC	66.2951	0
Case 1	5hmC	66.2951	0
Case 1	5hmC	66.6392	0
Case 1	5hmC	67.2127	0
Case 1	5hmC	67.4421	0
Case 1	5hmC	68.1302	0
Case 1	5hmC	68.8184	0
Case 1	5hmC	70.0801	0
Case 1	5hmC	70.1948	0
Case 1	5hmC	70.6536	0
Case 1	5hmC	71.2271	0
Case 1	5hmC	71.9153	0
Case 1	5hmC	72.1446	0
Case 1	5hmC	73.8651	0
Case 1	5hmC	75.4709	0
Case 1	5hmC	75.5856	0
Case 1	5hmC	75.5856	0
Case 1	5hmC	76.0444	0
Case 1	5hmC	76.0444	0
Case 1	5hmC	77.6501	0
Case 1	5hmC	79.1412	0
Case 1	5hmC	79.1412	0
Case 1	5hmC	79.8294	0
Case 1	5hmC	80.5176	0
Case 1	5hmC	81.4351	0
Case 1	5hmC	84.532	0
Case 1	5hmC	85.6789	0
Case 1	5hmC	87.17	0
Case 1	5hmC	91.7579	0
Case 1	5hmC	91.8726	0
Case 1	5hmC	92.9049	0
Case 1	5hmC	93.249	0
Case 1	5hmC	98.0663	0
Case 1	5hmC	101.851	0
Case 1	5hmC	102.081	0
Case 1	5hmC	108.274	0
Case 1	5hmC	108.504	0
Case 1	5hmC	108.504	0
Case 1	5hmC	109.536	0
Case 1	5hmC	112.862	0
Case 1	5hmC	115.5	0
Case 1	5hmC	116.074	0
Case 1	5hmC	116.188	0
Case 1	5hmC	121.235	0
Case 1	5hmC	123.414	0
Case 1	5hmC	124.791	0
Case 1	5hmC	126.052	0
Case 1	5hmC	127.314	0
Case 1	5hmC	129.837	0
Case 1	5hmC	134.54	0
Case 1	5hmC	135.687	0
Case 1	5hmC	137.752	0
Case 1	5hmC	139.931	0
Case 1	5hmC	147.845	0
Case 1	5hmC	148.189	0
Case 1	5hmC	151.171	0
Case 1	5hmC	151.859	0
Case 1	5hmC	154.727	0
Case 1	5hmC	154.841	0
Case 1	5hmC	154.956	0
Case 1	5hmC	155.759	0
Case 1	5hmC	164.705	0
Case 1	5hmC	167.688	0
Case 1	5hmC	169.752	0
Case 1	5hmC	170.211	0
Case 1	5hmC	172.39	0
Case 1	5hmC	186.269	0
Case 1	5hmC	219.645	0
Case 1	5hmC	235.13	0
Case 1	5hmC	236.506	0
Case 1	5hmC	241.667	0
Case 1	5hmC	245.108	0
Case 1	5hmC	295.231	0
Case 1	5hmC	306.127	0
Case 1	5hmC	319.776	0
Case 1	5hmC	366.229	0
Case 1	5hmC	450.646	0
Case 1	5hmC	471.521	0
Case 1	5hmC	853.693	0
Case 1	5hmC	128.117	0.114697
Case 1	5hmC	368.179	0.114697
Case 1	5hmC	40.2588	0.114697
Case 1	5hmC	62.2807	0.114697
Case 1	5hmC	81.2057	0.114697
Case 1	5hmC	157.365	0.114697
Case 1	5hmC	138.554	0.114697
Case 1	5hmC	212.534	0.114697
Case 1	5hmC	75.9297	0.114697
Case 1	5hmC	98.0663	0.114697
Case 1	5hmC	60.5602	0.114697
Case 1	5hmC	96.3458	0.114697
Case 1	5hmC	63.5423	0.114697
Case 1	5hmC	171.014	0.114697
Case 1	5hmC	71.5712	0.114697
Case 1	5hmC	144.519	0.114697
Case 1	5hmC	205.308	0.114697
Case 1	5hmC	77.8795	0.114697
Case 1	5hmC	94.0518	0.114697
Case 1	5hmC	151.745	0.114697
Case 1	5hmC	72.374	0.229395
Case 1	5hmC	38.8824	0.229395
Case 1	5hmC	72.2593	0.229395
Case 1	5hmC	126.282	0.229395
Case 1	5hmC	170.211	0.229395
Case 1	5hmC	52.302	0.229395
Case 1	5hmC	201.867	0.229395
Case 1	5hmC	89.5786	0.229395
Case 1	5hmC	59.1838	0.229395
Case 1	5hmC	65.1481	0.229395
Case 1	5hmC	85.3348	0.229395
Case 1	5hmC	125.02	0.229395
Case 1	5hmC	56.4311	0.229395
Case 1	5hmC	91.2991	0.229395
Case 1	5hmC	141.766	0.229395
Case 1	5hmC	267.474	0.229395
Case 1	5hmC	154.039	0.344092
Case 1	5hmC	97.3781	0.344092
Case 1	5hmC	95.6576	0.344092
Case 1	5hmC	126.052	0.344092
Case 1	5hmC	52.302	0.458789
Case 1	5hmC	111.83	0.458789
Case 1	5hmC	152.318	0.458789
Case 1	5hmC	181.107	0.458789
Case 1	5hmC	95.3135	0.458789
Case 1	5hmC	308.651	0.458789
Case 1	5hmC	58.7251	0.458789
Case 1	5hmC	47.37	0.458789
Case 1	5hmC	56.087	0.458789
Case 1	5hmC	72.0299	0.458789
Case 1	5hmC	88.7758	0.458789
Case 1	5hmC	103.342	0.458789
Case 1	5hmC	84.9908	0.573487
Case 1	5hmC	150.483	0.573487
Case 1	5hmC	214.599	0.573487
Case 1	5hmC	80.6322	0.573487
Case 1	5hmC	66.9833	0.688184
Case 1	5hmC	128.117	0.688184
Case 1	5hmC	174.455	0.688184
Case 1	5hmC	236.277	0.802882
Case 1	5hmC	114.927	0.802882
Case 1	5hmC	110.224	0.802882
Case 1	5hmC	50.2374	0.802882
Case 1	5hmC	116.991	0.802882
Case 1	5hmC	311.518	0.802882
Case 1	5hmC	105.751	0.917579
Case 1	5hmC	90.2668	0.917579
Case 1	5hmC	126.282	0.917579
Case 1	5hmC	104.489	0.917579
Case 1	5hmC	137.866	0.917579
Case 1	5hmC	107.471	0.802882
Case 1	5hmC	98.4103	0.917579
Case 1	5hmC	65.2628	0.917579
Case 1	5hmC	58.8397	1.03228
Case 1	5hmC	56.3164	1.26167
Case 1	5hmC	99.5573	0.917579
Case 1	5hmC	54.2519	1.03228
Case 1	5hmC	83.1556	0.917579
Case 1	5hmC	75.4709	1.03228
Case 1	5hmC	120.776	1.03228
Case 1	5hmC	89.2345	1.03228
Case 1	5hmC	183.86	1.03228
Case 1	5hmC	64.0011	1.14697
Case 1	5hmC	353.727	1.14697
Case 1	5hmC	65.8363	1.14697
Case 1	5hmC	117.565	1.14697
Case 1	5hmC	120.432	1.14697
Case 1	5hmC	109.536	1.14697
Case 1	5hmC	197.05	1.14697
Case 1	5hmC	35.4415	1.26167
Case 1	5hmC	97.4928	1.26167
Case 1	5hmC	138.21	1.14697
Case 1	5hmC	104.375	1.14697
Case 1	5hmC	77.5354	1.26167
Case 1	5hmC	74.2092	1.26167
Case 1	5hmC	246.37	1.26167
Case 1	5hmC	406.832	1.26167
Case 1	5hmC	65.3775	1.37637
Case 1	5hmC	248.32	1.37637
Case 1	5hmC	134.081	1.26167
Case 1	5hmC	41.7498	1.03228
Case 1	5hmC	251.073	1.49107
Case 1	5hmC	108.274	1.49107
Case 1	5hmC	98.1809	1.60576
Case 1	5hmC	389.283	1.60576
Case 1	5hmC	128.576	1.72046
Case 1	5hmC	55.5135	1.72046
Case 1	5hmC	90.2668	1.83516
Case 1	5hmC	227.101	1.72046
Case 1	5hmC	83.0409	1.83516
Case 1	5hmC	432.868	1.94985
Case 1	5hmC	48.2876	1.37637
Case 1	5hmC	135.228	1.83516
Case 1	5hmC	77.6501	1.72046
Case 1	5hmC	138.21	2.06455
Case 1	5hmC	157.938	2.06455
Case 1	5hmC	73.1769	2.06455
Case 1	5hmC	60.6749	1.94985
Case 1	5hmC	54.4813	2.40864
Case 1	5hmC	66.2951	2.52334
Case 1	5hmC	238.341	2.86743
Case 1	5hmC	280.32	2.52334
Case 1	5hmC	59.0691	2.06455
Case 1	5hmC	118.024	2.75274
Case 1	5hmC	148.992	2.86743
Case 1	5hmC	56.2017	2.52334
Case 1	5hmC	62.6248	2.86743
Case 1	5hmC	91.0697	2.75274
Case 1	5hmC	164.476	2.75274
Case 1	5hmC	157.709	3.32622
Case 1	5hmC	230.427	3.44092
Case 1	5hmC	865.162	3.32622
Case 1	5hmC	60.7896	3.32622
Case 1	5hmC	236.162	3.55562
Case 1	5hmC	282.614	3.55562
Case 1	5hmC	264.722	3.44092
Case 1	5hmC	73.2916	3.32622
Case 1	5hmC	176.863	3.32622
Case 1	5hmC	267.704	3.44092
Case 1	5hmC	69.6213	3.67032
Case 1	5hmC	114.353	3.89971
Case 1	5hmC	162.87	3.78501
Case 1	5hmC	107.586	3.21153
Case 1	5hmC	172.505	3.67032
Case 1	5hmC	426.904	4.2438
Case 1	5hmC	57.234	3.89971
Case 1	5hmC	57.234	3.55562
Case 1	5hmC	256.005	4.4732
Case 1	5hmC	146.813	4.58789
Case 1	5hmC	279.862	4.81729
Case 1	5hmC	256.234	4.01441
Case 1	5hmC	70.0801	5.04668
Case 1	5hmC	280.32	4.3585
Case 1	5hmC	368.179	4.93199
Case 1	5hmC	1318.68	5.50547
Case 1	5hmC	117.221	5.84957
Case 1	5hmC	75.2415	4.70259
Case 1	5hmC	441.011	5.73487
Case 1	5hmC	161.035	5.39078
Case 1	5hmC	59.6426	6.30835
Case 1	5hmC	283.302	6.30835
Case 1	5hmC	77.0766	6.65245
Case 1	5hmC	63.8864	6.65245
Case 1	5hmC	157.25	3.78501
Case 1	5hmC	212.534	6.07896
Case 1	5hmC	216.778	5.84957
Case 1	5hmC	423.348	6.76715
Case 1	5hmC	87.0553	6.65245
Case 1	5hmC	144.863	7.79942
Case 1	5hmC	111.715	5.96426
Case 1	5hmC	104.833	7.68472
Case 1	5hmC	107.586	7.34063
Case 1	5hmC	91.0697	7.79942
Case 1	5hmC	155.874	8.717
Case 1	5hmC	76.159	8.9464
Case 1	5hmC	110.912	7.45533
Case 1	5hmC	70.883	9.51988
Case 1	5hmC	110.339	9.97867
Case 1	5hmC	44.732	8.14351
Case 1	5hmC	304.407	9.63458
Case 1	5hmC	94.2812	8.8317
Case 1	5hmC	73.1769	7.45533
Case 1	5hmC	260.248	8.9464
Case 1	5hmC	156.562	10.6669
Case 1	5hmC	157.709	9.51988
Case 1	5hmC	268.277	10.6669
Case 1	5hmC	219.531	9.97867
Case 1	5hmC	221.022	9.74928
Case 1	5hmC	135.916	8.48761
Case 1	5hmC	215.746	8.37291
Case 1	5hmC	105.292	12.3873
Case 1	5hmC	155.186	12.8461
Case 1	5hmC	131.099	11.4697
Case 1	5hmC	376.896	12.7314
Case 1	5hmC	218.498	11.9285
Case 1	5hmC	146.698	12.1579
Case 1	5hmC	60.4455	15.9429
Case 1	5hmC	52.7608	12.6167
Case 1	5hmC	107.242	15.7135
Case 1	5hmC	221.595	14.2225
Case 1	5hmC	307.962	15.7135
Case 1	5hmC	214.484	16.287
Case 1	5hmC	147.96	19.3839
Case 1	5hmC	171.243	19.2692
Case 1	5hmC	94.74	24.8893
Case 1	5hmC	190.627	16.8605
Case 1	5hmC	94.2812	20.4161
Case 1	5hmC	91.6432	20.4161
Case 1	5hmC	90.7256	24.7746
Case 1	5hmC	555.365	18.3516
Case 1	5hmC	310.486	25.9216
Case 1	5hmC	109.192	28.1009
Case 1	5hmC	87.17	19.2692
Case 1	5hmC	116.877	27.298
Case 1	5hmC	374.946	30.2801
Case 1	5hmC	120.432	26.6098
Case 1	5hmC	128.805	33.6063
Case 1	5hmC	107.93	37.506
Case 1	5hmC	78.3383	39.8
Case 1	5hmC	110.568	36.8179
Case 1	5hmC	132.131	53.6784
Case 1	5hmC	298.328	41.8645
Case 1	5hmC	312.78	50.6962
Case 1	5hmC	569.358	58.0369
Case 1	5hmC	527.608	69.0478
Case 1	5hmC	1028.72	63.1983
Case 1	5hmC	436.309	62.6248
Case 1	5hmC	713.418	57.6928
Case 1	5hmC	359.232	73.6357
Case 1	5hmC	132.361	85.6789
Case 1	5hmC	265.295	134.311
Case 2	5mC	44.3879	0
Case 2	5mC	44.5026	0
Case 2	5mC	46.6818	0
Case 2	5mC	47.9435	0
Case 2	5mC	49.3199	0
Case 2	5mC	49.5493	0
Case 2	5mC	51.4991	0
Case 2	5mC	51.6138	0
Case 2	5mC	51.9579	0
Case 2	5mC	53.449	0
Case 2	5mC	53.9078	0
Case 2	5mC	56.8899	0
Case 2	5mC	58.0369	0
Case 2	5mC	59.4132	0
Case 2	5mC	59.5279	0
Case 2	5mC	59.7573	0
Case 2	5mC	61.4778	0
Case 2	5mC	62.8542	0
Case 2	5mC	63.657	0
Case 2	5mC	64.3452	0
Case 2	5mC	64.9187	0
Case 2	5mC	65.951	0
Case 2	5mC	67.7861	0
Case 2	5mC	68.1302	0
Case 2	5mC	68.7037	0
Case 2	5mC	68.8184	0
Case 2	5mC	69.1625	0
Case 2	5mC	69.3919	0
Case 2	5mC	70.6536	0
Case 2	5mC	71.6859	0
Case 2	5mC	72.4887	0
Case 2	5mC	73.9798	0
Case 2	5mC	76.159	0
Case 2	5mC	78.7971	0
Case 2	5mC	79.1412	0
Case 2	5mC	85.1054	0
Case 2	5mC	89.6933	0
Case 2	5mC	95.5429	0
Case 2	5mC	96.5752	0
Case 2	5mC	98.8691	0
Case 2	5mC	100.131	0
Case 2	5mC	101.966	0
Case 2	5mC	106.554	0
Case 2	5mC	108.504	0
Case 2	5mC	108.848	0
Case 2	5mC	109.536	0
Case 2	5mC	137.752	0
Case 2	5mC	147.845	0
Case 2	5mC	223.43	0
Case 2	5mC	96.4605	0.114697
Case 2	5mC	49.4346	0.114697
Case 2	5mC	47.1406	0.114697
Case 2	5mC	97.034	0.114697
Case 2	5mC	70.6536	0.114697
Case 2	5mC	70.7683	0.229395
Case 2	5mC	57.234	0.229395
Case 2	5mC	92.7902	0.344092
Case 2	5mC	56.087	0.344092
Case 2	5mC	63.7717	0.344092
Case 2	5mC	106.439	0.344092
Case 2	5mC	62.3954	0.344092
Case 2	5mC	75.9297	0.344092
Case 2	5mC	51.2697	0.344092
Case 2	5mC	151.515	0.344092
Case 2	5mC	96.3458	0.344092
Case 2	5mC	210.011	0.458789
Case 2	5mC	53.7931	0.458789
Case 2	5mC	100.245	0.458789
Case 2	5mC	106.324	0.458789
Case 2	5mC	42.438	0.458789
Case 2	5mC	69.0478	0.458789
Case 2	5mC	58.0369	0.573487
Case 2	5mC	60.4455	0.573487
Case 2	5mC	44.5026	0.573487
Case 2	5mC	99.7867	0.688184
Case 2	5mC	55.6282	0.573487
Case 2	5mC	80.5176	0.688184
Case 2	5mC	129.035	0.802882
Case 2	5mC	74.668	0.917579
Case 2	5mC	85.3348	0.802882
Case 2	5mC	39.2265	0.802882
Case 2	5mC	61.2484	0.917579
Case 2	5mC	92.7902	0.802882
Case 2	5mC	56.4311	1.03228
Case 2	5mC	60.7896	0.917579
Case 2	5mC	46.4524	0.917579
Case 2	5mC	80.8616	0.917579
Case 2	5mC	80.9763	0.917579
Case 2	5mC	101.966	0.917579
Case 2	5mC	114.124	1.03228
Case 2	5mC	53.2196	0.917579
Case 2	5mC	50.8109	0.917579
Case 2	5mC	61.3631	1.03228
Case 2	5mC	48.2876	0.917579
Case 2	5mC	63.0836	0.917579
Case 2	5mC	52.0726	0.917579
Case 2	5mC	60.4455	1.03228
Case 2	5mC	86.2524	1.14697
Case 2	5mC	88.2023	1.14697
Case 2	5mC	76.159	1.03228
Case 2	5mC	86.8259	1.14697
Case 2	5mC	109.192	1.14697
Case 2	5mC	72.7181	1.14697
Case 2	5mC	107.242	1.26167
Case 2	5mC	132.475	1.26167
Case 2	5mC	91.4138	1.14697
Case 2	5mC	58.0369	1.37637
Case 2	5mC	54.94	1.14697
Case 2	5mC	100.704	1.37637
Case 2	5mC	82.0086	1.37637
Case 2	5mC	69.2772	1.49107
Case 2	5mC	60.1014	1.49107
Case 2	5mC	121.235	1.49107
Case 2	5mC	75.815	1.49107
Case 2	5mC	451.908	1.60576
Case 2	5mC	84.1879	1.26167
Case 2	5mC	59.6426	1.49107
Case 2	5mC	47.37	1.26167
Case 2	5mC	71.8006	1.60576
Case 2	5mC	78.2236	1.49107
Case 2	5mC	108.963	1.72046
Case 2	5mC	74.4386	1.60576
Case 2	5mC	160.806	1.83516
Case 2	5mC	63.8864	1.60576
Case 2	5mC	70.5389	1.37637
Case 2	5mC	45.1908	1.72046
Case 2	5mC	330.902	1.83516
Case 2	5mC	43.3556	1.83516
Case 2	5mC	221.481	1.94985
Case 2	5mC	58.8397	1.72046
Case 2	5mC	81.6645	1.72046
Case 2	5mC	145.895	1.94985
Case 2	5mC	104.604	1.83516
Case 2	5mC	88.0876	2.06455
Case 2	5mC	50.3521	1.83516
Case 2	5mC	113.436	1.83516
Case 2	5mC	60.4455	2.17925
Case 2	5mC	67.7861	2.06455
Case 2	5mC	77.8795	2.06455
Case 2	5mC	53.6784	1.83516
Case 2	5mC	254.055	2.06455
Case 2	5mC	61.9366	2.29395
Case 2	5mC	67.098	2.29395
Case 2	5mC	76.2738	2.52334
Case 2	5mC	148.877	2.52334
Case 2	5mC	50.9256	2.40864
Case 2	5mC	57.8075	1.83516
Case 2	5mC	477.141	2.63804
Case 2	5mC	88.8905	2.40864
Case 2	5mC	64.4599	2.06455
Case 2	5mC	65.8363	1.94985
Case 2	5mC	81.4351	2.86743
Case 2	5mC	44.3879	1.94985
Case 2	5mC	251.417	2.40864
Case 2	5mC	73.7504	2.75274
Case 2	5mC	89.464	2.86743
Case 2	5mC	91.9873	2.75274
Case 2	5mC	158.168	2.75274
Case 2	5mC	126.97	2.86743
Case 2	5mC	98.7544	2.86743
Case 2	5mC	54.3666	2.17925
Case 2	5mC	43.1262	2.29395
Case 2	5mC	74.4386	2.63804
Case 2	5mC	54.1372	2.98213
Case 2	5mC	357.741	3.32622
Case 2	5mC	514.532	2.98213
Case 2	5mC	77.5354	3.55562
Case 2	5mC	97.9516	3.21153
Case 2	5mC	68.9331	3.32622
Case 2	5mC	44.6173	2.98213
Case 2	5mC	49.7787	3.55562
Case 2	5mC	89.2345	3.55562
Case 2	5mC	58.9544	2.86743
Case 2	5mC	114.468	3.67032
Case 2	5mC	99.9014	3.89971
Case 2	5mC	109.192	3.21153
Case 2	5mC	108.963	3.32622
Case 2	5mC	97.6075	3.67032
Case 2	5mC	54.7106	3.32622
Case 2	5mC	76.2738	3.78501
Case 2	5mC	79.1412	3.44092
Case 2	5mC	47.9435	4.12911
Case 2	5mC	100.36	4.01441
Case 2	5mC	40.0294	3.89971
Case 2	5mC	187.186	4.01441
Case 2	5mC	65.2628	3.44092
Case 2	5mC	208.749	4.3585
Case 2	5mC	70.6536	3.44092
Case 2	5mC	152.318	4.3585
Case 2	5mC	83.2703	4.12911
Case 2	5mC	95.4282	4.3585
Case 2	5mC	65.3775	4.2438
Case 2	5mC	82.1233	4.2438
Case 2	5mC	255.202	4.58789
Case 2	5mC	87.6288	4.70259
Case 2	5mC	105.063	4.4732
Case 2	5mC	79.3706	5.84957
Case 2	5mC	71.3418	5.04668
Case 2	5mC	105.751	4.81729
Case 2	5mC	82.6968	4.3585
Case 2	5mC	76.0444	5.04668
Case 2	5mC	86.4818	5.73487
Case 2	5mC	87.2847	5.96426
Case 2	5mC	111.256	5.96426
Case 2	5mC	98.0663	5.39078
Case 2	5mC	77.0766	5.50547
Case 2	5mC	54.94	6.19366
Case 2	5mC	50.3521	6.19366
Case 2	5mC	69.9654	5.84957
Case 2	5mC	176.519	6.65245
Case 2	5mC	134.196	5.04668
Case 2	5mC	58.6104	6.07896
Case 2	5mC	101.163	6.19366
Case 2	5mC	42.7821	6.42305
Case 2	5mC	181.795	6.53775
Case 2	5mC	156.677	5.73487
Case 2	5mC	55.9723	6.30835
Case 2	5mC	94.5106	6.42305
Case 2	5mC	37.9648	6.99654
Case 2	5mC	263.116	7.79942
Case 2	5mC	172.046	6.30835
Case 2	5mC	74.0945	7.79942
Case 2	5mC	104.719	7.34063
Case 2	5mC	55.8576	9.97867
Case 2	5mC	65.6069	8.25821
Case 2	5mC	72.0299	9.06109
Case 2	5mC	141.307	7.11124
Case 2	5mC	170.326	9.40518
Case 2	5mC	118.024	8.48761
Case 2	5mC	105.407	8.6023
Case 2	5mC	72.6034	8.6023
Case 2	5mC	105.636	9.17579
Case 2	5mC	272.865	9.29049
Case 2	5mC	104.604	9.17579
Case 2	5mC	148.418	7.91412
Case 2	5mC	60.7896	8.717
Case 2	5mC	71.3418	9.51988
Case 2	5mC	252.793	7.79942
Case 2	5mC	68.2449	10.3228
Case 2	5mC	125.25	8.48761
Case 2	5mC	71.5712	10.6669
Case 2	5mC	74.3239	9.63458
Case 2	5mC	138.44	9.51988
Case 2	5mC	103.457	9.40518
Case 2	5mC	94.8547	9.63458
Case 2	5mC	73.7504	11.8138
Case 2	5mC	53.7931	9.86397
Case 2	5mC	53.5637	9.63458
Case 2	5mC	226.527	12.2726
Case 2	5mC	67.3274	10.7816
Case 2	5mC	54.0225	9.51988
Case 2	5mC	367.834	11.4697
Case 2	5mC	68.7037	11.4697
Case 2	5mC	143.028	11.1256
Case 2	5mC	100.704	11.355
Case 2	5mC	193.839	14.4519
Case 2	5mC	65.0334	11.6991
Case 2	5mC	74.2092	11.355
Case 2	5mC	210.355	14.2225
Case 2	5mC	164.705	12.0432
Case 2	5mC	133.852	12.502
Case 2	5mC	88.8905	12.6167
Case 2	5mC	149.909	12.0432
Case 2	5mC	137.063	13.5343
Case 2	5mC	68.1302	13.9931
Case 2	5mC	55.2841	14.796
Case 2	5mC	126.167	14.6813
Case 2	5mC	92.4461	14.6813
Case 2	5mC	97.2634	14.6813
Case 2	5mC	73.9798	15.4841
Case 2	5mC	110.683	14.9107
Case 2	5mC	97.2634	13.7637
Case 2	5mC	96.2311	12.502
Case 2	5mC	105.522	14.3372
Case 2	5mC	140.16	15.8282
Case 2	5mC	100.131	13.8784
Case 2	5mC	47.7141	14.6813
Case 2	5mC	108.274	16.6311
Case 2	5mC	41.5204	19.8426
Case 2	5mC	69.6213	16.7458
Case 2	5mC	100.131	15.1401
Case 2	5mC	453.055	19.4986
Case 2	5mC	513.959	19.0398
Case 2	5mC	73.521	19.2692
Case 2	5mC	202.211	19.6133
Case 2	5mC	126.167	20.8749
Case 2	5mC	132.361	19.0398
Case 2	5mC	176.405	20.6455
Case 2	5mC	120.776	24.4305
Case 2	5mC	150.827	24.0864
Case 2	5mC	421.513	23.513
Case 2	5mC	52.5314	22.5954
Case 2	5mC	142.225	20.5308
Case 2	5mC	709.977	25.1187
Case 2	5mC	283.302	26.0363
Case 2	5mC	147.271	21.5631
Case 2	5mC	219.301	28.789
Case 2	5mC	128.002	28.789
Case 2	5mC	206.57	23.3983
Case 2	5mC	434.818	32.1153
Case 2	5mC	273.094	25.4628
Case 2	5mC	150.712	36.5885
Case 2	5mC	331.705	32.9181
Case 2	5mC	107.93	32.0006
Case 2	5mC	607.323	35.9003
Case 2	5mC	324.938	41.7498
Case 2	5mC	215.058	35.3268
Case 2	5mC	244.879	35.0974
Case 2	5mC	328.149	37.0472
Case 2	5mC	76.6178	54.5959
Case 2	5mC	117.565	46.5671
Case 2	5mC	264.492	45.5349
Case 2	5mC	310.027	51.2697
Case 2	5mC	239.947	52.8755
Case 2	5mC	362.444	90.6109
Case 2	5mC	595.05	90.0374
Case 2	5mC	460.051	91.5285
Case 2	5mC	101.851	75.815
Case 2	5mC	246.255	80.7469
Case 2	5mC	329.067	99.7867
Case 2	5mC	182.828	182.828
Case 2	5mC	1460.21	575.093
Case 2	5hmC	36.015	0
Case 2	5hmC	38.5383	0
Case 2	5hmC	38.7677	0
Case 2	5hmC	39.8	0
Case 2	5hmC	40.4882	0
Case 2	5hmC	40.947	0
Case 2	5hmC	41.8645	0
Case 2	5hmC	42.0939	0
Case 2	5hmC	42.6674	0
Case 2	5hmC	43.2409	0
Case 2	5hmC	43.585	0
Case 2	5hmC	43.8144	0
Case 2	5hmC	44.0438	0
Case 2	5hmC	44.0438	0
Case 2	5hmC	45.4202	0
Case 2	5hmC	46.223	0
Case 2	5hmC	46.9112	0
Case 2	5hmC	47.8288	0
Case 2	5hmC	49.0905	0
Case 2	5hmC	49.4346	0
Case 2	5hmC	49.664	0
Case 2	5hmC	49.7787	0
Case 2	5hmC	49.7787	0
Case 2	5hmC	50.1227	0
Case 2	5hmC	50.6962	0
Case 2	5hmC	50.8109	0
Case 2	5hmC	51.0403	0
Case 2	5hmC	51.0403	0
Case 2	5hmC	51.4991	0
Case 2	5hmC	51.4991	0
Case 2	5hmC	52.8755	0
Case 2	5hmC	53.5637	0
Case 2	5hmC	53.6784	0
Case 2	5hmC	54.0225	0
Case 2	5hmC	54.7106	0
Case 2	5hmC	54.7106	0
Case 2	5hmC	55.0547	0
Case 2	5hmC	55.0547	0
Case 2	5hmC	55.0547	0
Case 2	5hmC	55.1694	0
Case 2	5hmC	55.8576	0
Case 2	5hmC	56.5458	0
Case 2	5hmC	56.8899	0
Case 2	5hmC	57.234	0
Case 2	5hmC	57.4634	0
Case 2	5hmC	57.9222	0
Case 2	5hmC	58.7251	0
Case 2	5hmC	61.1337	0
Case 2	5hmC	63.8864	0
Case 2	5hmC	65.6069	0
Case 2	5hmC	65.7216	0
Case 2	5hmC	66.4098	0
Case 2	5hmC	66.8686	0
Case 2	5hmC	68.2449	0
Case 2	5hmC	68.589	0
Case 2	5hmC	70.4242	0
Case 2	5hmC	71.3418	0
Case 2	5hmC	74.2092	0
Case 2	5hmC	74.3239	0
Case 2	5hmC	74.3239	0
Case 2	5hmC	74.668	0
Case 2	5hmC	75.5856	0
Case 2	5hmC	77.7648	0
Case 2	5hmC	79.0265	0
Case 2	5hmC	81.4351	0
Case 2	5hmC	84.1879	0
Case 2	5hmC	86.5965	0
Case 2	5hmC	89.464	0
Case 2	5hmC	92.9049	0
Case 2	5hmC	99.0985	0
Case 2	5hmC	100.131	0
Case 2	5hmC	100.934	0
Case 2	5hmC	102.654	0
Case 2	5hmC	107.701	0
Case 2	5hmC	111.715	0
Case 2	5hmC	113.206	0
Case 2	5hmC	116.074	0
Case 2	5hmC	116.762	0
Case 2	5hmC	119.973	0
Case 2	5hmC	122.497	0
Case 2	5hmC	126.741	0
Case 2	5hmC	131.328	0
Case 2	5hmC	133.049	0
Case 2	5hmC	136.26	0
Case 2	5hmC	145.207	0
Case 2	5hmC	150.942	0
Case 2	5hmC	152.662	0
Case 2	5hmC	154.612	0
Case 2	5hmC	164.361	0
Case 2	5hmC	166.311	0
Case 2	5hmC	180.878	0
Case 2	5hmC	187.53	0
Case 2	5hmC	198.426	0
Case 2	5hmC	204.735	0
Case 2	5hmC	205.308	0
Case 2	5hmC	211.387	0
Case 2	5hmC	243.158	0
Case 2	5hmC	267.015	0
Case 2	5hmC	330.214	0
Case 2	5hmC	415.893	0
Case 2	5hmC	66.0657	0.114697
Case 2	5hmC	460.625	0.114697
Case 2	5hmC	58.381	0.114697
Case 2	5hmC	83.1556	0.114697
Case 2	5hmC	93.8224	0.114697
Case 2	5hmC	76.6178	0.114697
Case 2	5hmC	52.8755	0.114697
Case 2	5hmC	64.6893	0.114697
Case 2	5hmC	118.826	0.114697
Case 2	5hmC	86.8259	0.114697
Case 2	5hmC	60.4455	0.229395
Case 2	5hmC	287.202	0.229395
Case 2	5hmC	88.317	0.229395
Case 2	5hmC	274.012	0.229395
Case 2	5hmC	123.873	0.229395
Case 2	5hmC	61.019	0.229395
Case 2	5hmC	53.9078	0.229395
Case 2	5hmC	99.9014	0.229395
Case 2	5hmC	44.6173	0.229395
Case 2	5hmC	297.066	0.344092
Case 2	5hmC	256.234	0.344092
Case 2	5hmC	80.8616	0.344092
Case 2	5hmC	60.2161	0.344092
Case 2	5hmC	102.195	0.458789
Case 2	5hmC	48.8611	0.458789
Case 2	5hmC	66.2951	0.458789
Case 2	5hmC	190.742	0.458789
Case 2	5hmC	126.511	0.458789
Case 2	5hmC	172.275	0.458789
Case 2	5hmC	55.7429	0.458789
Case 2	5hmC	90.955	0.573487
Case 2	5hmC	59.5279	0.573487
Case 2	5hmC	50.1227	0.573487
Case 2	5hmC	43.8144	0.573487
Case 2	5hmC	113.092	0.573487
Case 2	5hmC	225.954	0.688184
Case 2	5hmC	42.6674	0.688184
Case 2	5hmC	55.5135	0.917579
Case 2	5hmC	56.3164	0.917579
Case 2	5hmC	63.4276	0.917579
Case 2	5hmC	160.806	1.03228
Case 2	5hmC	68.1302	1.26167
Case 2	5hmC	145.436	1.14697
Case 2	5hmC	83.6144	1.26167
Case 2	5hmC	95.7723	1.37637
Case 2	5hmC	660.657	1.49107
Case 2	5hmC	65.8363	1.60576
Case 2	5hmC	62.6248	1.49107
Case 2	5hmC	47.37	1.49107
Case 2	5hmC	39.2265	1.49107
Case 2	5hmC	202.785	1.37637
Case 2	5hmC	86.9406	1.60576
Case 2	5hmC	70.1948	1.72046
Case 2	5hmC	85.5642	1.94985
Case 2	5hmC	54.7106	2.06455
Case 2	5hmC	43.3556	1.83516
Case 2	5hmC	234.097	1.94985
Case 2	5hmC	51.6138	2.17925
Case 2	5hmC	66.7539	2.06455
Case 2	5hmC	364.738	2.40864
Case 2	5hmC	345.01	2.06455
Case 2	5hmC	198.312	2.52334
Case 2	5hmC	46.4524	2.52334
Case 2	5hmC	78.9118	2.52334
Case 2	5hmC	80.8616	2.86743
Case 2	5hmC	81.3204	2.63804
Case 2	5hmC	104.489	3.09683
Case 2	5hmC	64.0011	3.21153
Case 2	5hmC	56.6605	3.09683
Case 2	5hmC	94.9694	2.98213
Case 2	5hmC	247.058	3.32622
Case 2	5hmC	371.39	2.75274
Case 2	5hmC	64.9187	2.98213
Case 2	5hmC	91.5285	2.86743
Case 2	5hmC	510.862	4.12911
Case 2	5hmC	114.009	4.3585
Case 2	5hmC	182.598	4.3585
Case 2	5hmC	149.909	4.01441
Case 2	5hmC	225.724	3.78501
Case 2	5hmC	133.278	4.58789
Case 2	5hmC	42.2086	3.44092
Case 2	5hmC	404.194	4.70259
Case 2	5hmC	54.0225	4.4732
Case 2	5hmC	41.1764	5.16138
Case 2	5hmC	74.5533	3.67032
Case 2	5hmC	139.128	4.4732
Case 2	5hmC	91.4138	4.93199
Case 2	5hmC	64.0011	3.44092
Case 2	5hmC	78.7971	4.93199
Case 2	5hmC	86.7112	4.81729
Case 2	5hmC	105.177	4.93199
Case 2	5hmC	102.884	4.70259
Case 2	5hmC	179.157	6.19366
Case 2	5hmC	171.128	5.27608
Case 2	5hmC	66.8686	5.96426
Case 2	5hmC	107.816	6.30835
Case 2	5hmC	79.4853	5.50547
Case 2	5hmC	162.87	5.27608
Case 2	5hmC	188.333	6.07896
Case 2	5hmC	78.2236	5.84957
Case 2	5hmC	109.765	7.45533
Case 2	5hmC	137.407	7.68472
Case 2	5hmC	128.92	7.22593
Case 2	5hmC	135.572	7.22593
Case 2	5hmC	85.1054	8.14351
Case 2	5hmC	117.221	8.8317
Case 2	5hmC	169.179	8.14351
Case 2	5hmC	251.187	11.6991
Case 2	5hmC	76.0444	13.7637
Case 2	5hmC	204.62	9.40518
Case 2	5hmC	90.4962	12.8461
Case 2	5hmC	117.221	11.9285
Case 2	5hmC	167.917	12.2726
Case 2	5hmC	320.923	11.9285
Case 2	5hmC	70.6536	13.3049
Case 2	5hmC	65.951	13.649
Case 2	5hmC	297.984	11.5844
Case 2	5hmC	239.603	14.796
Case 2	5hmC	80.0588	18.2369
Case 2	5hmC	218.269	17.6634
Case 2	5hmC	63.0836	14.5666
Case 2	5hmC	208.061	18.6957
Case 2	5hmC	100.819	17.2046
Case 2	5hmC	128.117	17.3193
Case 2	5hmC	473.241	20.6455
Case 2	5hmC	59.7573	19.9573
Case 2	5hmC	172.505	17.8928
Case 2	5hmC	125.823	19.7279
Case 2	5hmC	203.932	20.9896
Case 2	5hmC	122.726	22.4807
Case 2	5hmC	318.629	22.366
Case 2	5hmC	161.953	25.6922
Case 2	5hmC	224.922	37.8501
Case 2	5hmC	138.669	28.9037
Case 2	5hmC	246.829	37.8501
Case 2	5hmC	96.5752	29.7066
Case 2	5hmC	59.5279	32.5741
Case 2	5hmC	455.693	33.6063
Case 2	5hmC	132.934	34.0651
Case 2	5hmC	49.2052	46.223
Case 2	5hmC	866.653	50.9256
Case 2	5hmC	327.117	49.4346
Case 2	5hmC	682.793	57.0046
Case 2	5hmC	91.0697	58.2663
Case 2	5hmC	191.774	73.6357
Case 2	5hmC	214.599	70.883
Case 2	5hmC	732.802	93.4784
Case 2	5hmC	148.648	148.533
Case 3	5mC	37.8501	0
Case 3	5mC	41.0617	0
Case 3	5mC	41.7498	0
Case 3	5mC	43.2409	0
Case 3	5mC	43.585	0
Case 3	5mC	44.5026	0
Case 3	5mC	44.9614	0
Case 3	5mC	45.9936	0
Case 3	5mC	47.0259	0
Case 3	5mC	50.6962	0
Case 3	5mC	50.9256	0
Case 3	5mC	50.9256	0
Case 3	5mC	51.3844	0
Case 3	5mC	51.6138	0
Case 3	5mC	52.7608	0
Case 3	5mC	52.8755	0
Case 3	5mC	52.9902	0
Case 3	5mC	57.234	0
Case 3	5mC	61.5925	0
Case 3	5mC	66.0657	0
Case 3	5mC	67.5567	0
Case 3	5mC	69.3919	0
Case 3	5mC	73.8651	0
Case 3	5mC	83.9585	0
Case 3	5mC	93.0196	0
Case 3	5mC	93.9371	0
Case 3	5mC	116.877	0
Case 3	5mC	159.544	0
Case 3	5mC	159.659	0
Case 3	5mC	180.648	0
Case 3	5mC	49.3199	0.114697
Case 3	5mC	155.071	0.114697
Case 3	5mC	39.4559	0.114697
Case 3	5mC	38.0795	0.114697
Case 3	5mC	63.0836	0.114697
Case 3	5mC	44.5026	0.114697
Case 3	5mC	103.457	0.114697
Case 3	5mC	79.6	0.114697
Case 3	5mC	52.8755	0.229395
Case 3	5mC	78.5677	0.229395
Case 3	5mC	49.7787	0.229395
Case 3	5mC	50.3521	0.229395
Case 3	5mC	50.9256	0.229395
Case 3	5mC	68.3596	0.229395
Case 3	5mC	90.6109	0.229395
Case 3	5mC	123.3	0.229395
Case 3	5mC	36.8179	0.229395
Case 3	5mC	40.8323	0.229395
Case 3	5mC	118.941	0.344092
Case 3	5mC	90.955	0.344092
Case 3	5mC	68.8184	0.458789
Case 3	5mC	46.223	0.458789
Case 3	5mC	54.2519	0.458789
Case 3	5mC	39.2265	0.458789
Case 3	5mC	168.949	0.458789
Case 3	5mC	41.2911	0.458789
Case 3	5mC	61.8219	0.458789
Case 3	5mC	38.8824	0.458789
Case 3	5mC	47.2553	0.573487
Case 3	5mC	43.585	0.573487
Case 3	5mC	98.2956	0.573487
Case 3	5mC	39.8	0.688184
Case 3	5mC	50.1227	0.688184
Case 3	5mC	41.5204	0.688184
Case 3	5mC	38.9971	0.802882
Case 3	5mC	59.5279	0.802882
Case 3	5mC	52.1873	0.917579
Case 3	5mC	48.1729	0.917579
Case 3	5mC	74.668	0.917579
Case 3	5mC	69.0478	0.917579
Case 3	5mC	50.2374	1.03228
Case 3	5mC	54.4813	1.14697
Case 3	5mC	64.9187	1.03228
Case 3	5mC	49.2052	1.37637
Case 3	5mC	67.9008	1.37637
Case 3	5mC	46.5671	1.14697
Case 3	5mC	56.3164	1.26167
Case 3	5mC	47.8288	1.37637
Case 3	5mC	56.4311	1.37637
Case 3	5mC	44.5026	1.49107
Case 3	5mC	57.4634	1.49107
Case 3	5mC	41.7498	1.49107
Case 3	5mC	41.1764	1.60576
Case 3	5mC	89.5786	1.60576
Case 3	5mC	40.8323	1.49107
Case 3	5mC	128.002	1.72046
Case 3	5mC	51.8432	1.72046
Case 3	5mC	115.386	1.94985
Case 3	5mC	75.1268	1.83516
Case 3	5mC	44.2732	1.83516
Case 3	5mC	102.425	2.52334
Case 3	5mC	65.0334	1.94985
Case 3	5mC	86.8259	2.29395
Case 3	5mC	45.3055	2.29395
Case 3	5mC	126.741	2.52334
Case 3	5mC	54.1372	2.63804
Case 3	5mC	36.4738	2.29395
Case 3	5mC	56.2017	2.52334
Case 3	5mC	76.2738	2.40864
Case 3	5mC	39.6853	2.40864
Case 3	5mC	94.1665	2.63804
Case 3	5mC	57.3487	2.40864
Case 3	5mC	54.5959	2.63804
Case 3	5mC	78.453	2.86743
Case 3	5mC	82.8115	2.75274
Case 3	5mC	71.2271	2.75274
Case 3	5mC	39.6853	2.40864
Case 3	5mC	57.6928	2.98213
Case 3	5mC	84.0732	2.40864
Case 3	5mC	46.9112	2.75274
Case 3	5mC	40.947	2.98213
Case 3	5mC	58.9544	2.75274
Case 3	5mC	115.73	2.75274
Case 3	5mC	43.0115	2.75274
Case 3	5mC	90.3815	3.09683
Case 3	5mC	92.3314	2.98213
Case 3	5mC	190.168	3.21153
Case 3	5mC	105.522	3.32622
Case 3	5mC	81.8939	3.67032
Case 3	5mC	37.3913	3.67032
Case 3	5mC	68.4743	3.21153
Case 3	5mC	68.8184	3.44092
Case 3	5mC	85.1054	3.32622
Case 3	5mC	37.8501	3.32622
Case 3	5mC	77.8795	3.89971
Case 3	5mC	42.7821	4.12911
Case 3	5mC	120.088	3.67032
Case 3	5mC	61.8219	3.55562
Case 3	5mC	153.236	4.12911
Case 3	5mC	83.9585	4.12911
Case 3	5mC	94.74	3.21153
Case 3	5mC	51.4991	3.78501
Case 3	5mC	98.525	4.3585
Case 3	5mC	124.905	4.2438
Case 3	5mC	54.3666	4.2438
Case 3	5mC	54.94	3.67032
Case 3	5mC	59.4132	4.58789
Case 3	5mC	58.381	4.01441
Case 3	5mC	84.1879	4.58789
Case 3	5mC	205.079	4.3585
Case 3	5mC	58.6104	4.4732
Case 3	5mC	78.3383	4.70259
Case 3	5mC	68.4743	4.3585
Case 3	5mC	126.855	5.04668
Case 3	5mC	109.995	4.70259
Case 3	5mC	168.032	5.39078
Case 3	5mC	71.9153	5.84957
Case 3	5mC	68.3596	4.3585
Case 3	5mC	66.7539	6.19366
Case 3	5mC	62.3954	5.84957
Case 3	5mC	95.0841	5.84957
Case 3	5mC	43.3556	5.84957
Case 3	5mC	126.167	5.50547
Case 3	5mC	97.3781	5.96426
Case 3	5mC	116.762	5.16138
Case 3	5mC	92.4461	6.65245
Case 3	5mC	116.418	5.39078
Case 3	5mC	73.0622	5.39078
Case 3	5mC	81.2057	6.30835
Case 3	5mC	169.293	6.42305
Case 3	5mC	43.9291	5.96426
Case 3	5mC	142.454	5.96426
Case 3	5mC	134.655	7.11124
Case 3	5mC	167.573	6.19366
Case 3	5mC	125.823	5.50547
Case 3	5mC	93.8224	6.30835
Case 3	5mC	60.7896	7.11124
Case 3	5mC	162.411	6.76715
Case 3	5mC	93.4784	7.22593
Case 3	5mC	156.447	8.25821
Case 3	5mC	116.188	6.19366
Case 3	5mC	121.694	7.68472
Case 3	5mC	57.8075	6.07896
Case 3	5mC	111.601	6.65245
Case 3	5mC	153.465	7.34063
Case 3	5mC	183.401	7.91412
Case 3	5mC	92.5608	6.88184
Case 3	5mC	53.7931	7.79942
Case 3	5mC	115.615	7.57003
Case 3	5mC	105.063	6.76715
Case 3	5mC	208.52	8.717
Case 3	5mC	87.6288	8.6023
Case 3	5mC	76.8472	8.02882
Case 3	5mC	115.959	8.6023
Case 3	5mC	227.101	8.6023
Case 3	5mC	99.3279	9.06109
Case 3	5mC	90.3815	7.79942
Case 3	5mC	143.257	9.97867
Case 3	5mC	57.4634	8.6023
Case 3	5mC	170.44	10.3228
Case 3	5mC	88.8905	10.3228
Case 3	5mC	92.6755	9.86397
Case 3	5mC	52.9902	9.17579
Case 3	5mC	69.736	11.2403
Case 3	5mC	192.118	12.2726
Case 3	5mC	131.443	13.5343
Case 3	5mC	127.658	10.8963
Case 3	5mC	121.235	13.1902
Case 3	5mC	80.1735	12.7314
Case 3	5mC	112.059	12.0432
Case 3	5mC	45.6496	13.1902
Case 3	5mC	43.8144	11.1256
Case 3	5mC	103.572	13.0755
Case 3	5mC	164.361	15.3694
Case 3	5mC	123.07	14.9107
Case 3	5mC	158.856	16.6311
Case 3	5mC	105.177	14.4519
Case 3	5mC	182.254	17.8928
Case 3	5mC	116.877	18.4663
Case 3	5mC	182.598	17.2046
Case 3	5mC	201.867	17.5487
Case 3	5mC	208.061	24.4305
Case 3	5mC	98.2956	19.1545
Case 3	5mC	57.9222	27.7568
Case 3	5mC	125.135	26.0363
Case 3	5mC	95.5429	26.2657
Case 3	5mC	127.314	28.1009
Case 3	5mC	71.4565	22.8248
Case 3	5mC	166.311	22.1366
Case 3	5mC	89.5786	23.9718
Case 3	5mC	130.87	27.6421
Case 3	5mC	205.767	27.6421
Case 3	5mC	221.137	29.8213
Case 3	5mC	203.932	26.6098
Case 3	5mC	304.98	29.7066
Case 3	5mC	68.589	33.721
Case 3	5mC	78.3383	31.6565
Case 3	5mC	190.283	34.868
Case 3	5mC	318.4	40.4882
Case 3	5mC	137.178	35.4415
Case 3	5mC	111.945	28.9037
Case 3	5mC	112.748	38.9971
Case 3	5mC	304.407	47.9435
Case 3	5mC	367.49	47.2553
Case 3	5mC	170.44	76.159
Case 3	5mC	183.172	86.7112
Case 3	5mC	101.048	100.475
Case 3	5hmC	36.3591	0
Case 3	5hmC	36.3591	0
Case 3	5hmC	36.5885	0
Case 3	5hmC	36.9326	0
Case 3	5hmC	37.1619	0
Case 3	5hmC	37.3913	0
Case 3	5hmC	37.506	0
Case 3	5hmC	37.7354	0
Case 3	5hmC	38.9971	0
Case 3	5hmC	39.5706	0
Case 3	5hmC	39.5706	0
Case 3	5hmC	39.8	0
Case 3	5hmC	39.9147	0
Case 3	5hmC	40.2588	0
Case 3	5hmC	40.4882	0
Case 3	5hmC	40.7176	0
Case 3	5hmC	42.2086	0
Case 3	5hmC	42.7821	0
Case 3	5hmC	43.1262	0
Case 3	5hmC	43.1262	0
Case 3	5hmC	43.3556	0
Case 3	5hmC	43.9291	0
Case 3	5hmC	44.0438	0
Case 3	5hmC	44.0438	0
Case 3	5hmC	44.1585	0
Case 3	5hmC	44.2732	0
Case 3	5hmC	44.5026	0
Case 3	5hmC	44.8467	0
Case 3	5hmC	44.9614	0
Case 3	5hmC	45.1908	0
Case 3	5hmC	45.7643	0
Case 3	5hmC	45.9936	0
Case 3	5hmC	46.1083	0
Case 3	5hmC	46.3377	0
Case 3	5hmC	47.4847	0
Case 3	5hmC	48.0582	0
Case 3	5hmC	48.0582	0
Case 3	5hmC	48.1729	0
Case 3	5hmC	48.6317	0
Case 3	5hmC	49.0905	0
Case 3	5hmC	49.2052	0
Case 3	5hmC	49.3199	0
Case 3	5hmC	49.7787	0
Case 3	5hmC	50.2374	0
Case 3	5hmC	50.3521	0
Case 3	5hmC	50.4668	0
Case 3	5hmC	50.6962	0
Case 3	5hmC	51.3844	0
Case 3	5hmC	53.6784	0
Case 3	5hmC	54.0225	0
Case 3	5hmC	54.3666	0
Case 3	5hmC	55.1694	0
Case 3	5hmC	55.1694	0
Case 3	5hmC	56.087	0
Case 3	5hmC	56.087	0
Case 3	5hmC	57.9222	0
Case 3	5hmC	58.381	0
Case 3	5hmC	58.4957	0
Case 3	5hmC	58.9544	0
Case 3	5hmC	59.7573	0
Case 3	5hmC	59.7573	0
Case 3	5hmC	59.872	0
Case 3	5hmC	60.1014	0
Case 3	5hmC	60.3308	0
Case 3	5hmC	60.9043	0
Case 3	5hmC	61.2484	0
Case 3	5hmC	61.9366	0
Case 3	5hmC	63.657	0
Case 3	5hmC	63.7717	0
Case 3	5hmC	65.1481	0
Case 3	5hmC	65.3775	0
Case 3	5hmC	65.8363	0
Case 3	5hmC	67.7861	0
Case 3	5hmC	68.8184	0
Case 3	5hmC	70.883	0
Case 3	5hmC	72.374	0
Case 3	5hmC	72.7181	0
Case 3	5hmC	75.1268	0
Case 3	5hmC	75.1268	0
Case 3	5hmC	75.3562	0
Case 3	5hmC	76.6178	0
Case 3	5hmC	78.1089	0
Case 3	5hmC	79.3706	0
Case 3	5hmC	80.6322	0
Case 3	5hmC	82.0086	0
Case 3	5hmC	87.8582	0
Case 3	5hmC	89.3493	0
Case 3	5hmC	89.5786	0
Case 3	5hmC	90.0374	0
Case 3	5hmC	90.3815	0
Case 3	5hmC	95.7723	0
Case 3	5hmC	97.034	0
Case 3	5hmC	100.131	0
Case 3	5hmC	100.36	0
Case 3	5hmC	103.113	0
Case 3	5hmC	105.866	0
Case 3	5hmC	109.307	0
Case 3	5hmC	109.421	0
Case 3	5hmC	109.421	0
Case 3	5hmC	109.651	0
Case 3	5hmC	111.371	0
Case 3	5hmC	114.468	0
Case 3	5hmC	115.271	0
Case 3	5hmC	118.138	0
Case 3	5hmC	130.984	0
Case 3	5hmC	132.131	0
Case 3	5hmC	132.82	0
Case 3	5hmC	138.096	0
Case 3	5hmC	139.013	0
Case 3	5hmC	142.684	0
Case 3	5hmC	145.207	0
Case 3	5hmC	162.297	0
Case 3	5hmC	50.1227	0.114697
Case 3	5hmC	44.6173	0.114697
Case 3	5hmC	53.6784	0.114697
Case 3	5hmC	67.4421	0.114697
Case 3	5hmC	120.318	0.114697
Case 3	5hmC	100.934	0.114697
Case 3	5hmC	126.282	0.114697
Case 3	5hmC	195.444	0.114697
Case 3	5hmC	56.7752	0.114697
Case 3	5hmC	88.4317	0.114697
Case 3	5hmC	54.1372	0.114697
Case 3	5hmC	74.2092	0.114697
Case 3	5hmC	75.7003	0.229395
Case 3	5hmC	50.0081	0.229395
Case 3	5hmC	147.616	0.229395
Case 3	5hmC	97.1487	0.229395
Case 3	5hmC	77.4207	0.229395
Case 3	5hmC	102.539	0.229395
Case 3	5hmC	58.0369	0.229395
Case 3	5hmC	57.3487	0.344092
Case 3	5hmC	49.5493	0.344092
Case 3	5hmC	101.737	0.344092
Case 3	5hmC	72.4887	0.344092
Case 3	5hmC	112.748	0.458789
Case 3	5hmC	94.8547	0.458789
Case 3	5hmC	222.742	0.458789
Case 3	5hmC	38.653	0.458789
Case 3	5hmC	75.9297	0.573487
Case 3	5hmC	55.0547	0.573487
Case 3	5hmC	80.6322	0.573487
Case 3	5hmC	134.311	0.688184
Case 3	5hmC	60.6749	0.688184
Case 3	5hmC	66.7539	0.688184
Case 3	5hmC	49.2052	0.802882
Case 3	5hmC	90.2668	0.802882
Case 3	5hmC	58.2663	0.802882
Case 3	5hmC	83.9585	0.802882
Case 3	5hmC	122.841	0.917579
Case 3	5hmC	39.2265	0.802882
Case 3	5hmC	54.3666	0.917579
Case 3	5hmC	42.5527	0.802882
Case 3	5hmC	113.665	0.917579
Case 3	5hmC	55.1694	0.917579
Case 3	5hmC	59.9867	1.03228
Case 3	5hmC	49.8934	1.03228
Case 3	5hmC	249.467	1.03228
Case 3	5hmC	149.336	1.03228
Case 3	5hmC	91.0697	1.03228
Case 3	5hmC	49.664	1.14697
Case 3	5hmC	102.884	1.14697
Case 3	5hmC	107.816	1.14697
Case 3	5hmC	42.7821	1.14697
Case 3	5hmC	51.9579	1.26167
Case 3	5hmC	108.618	1.49107
Case 3	5hmC	52.0726	1.37637
Case 3	5hmC	72.374	1.49107
Case 3	5hmC	49.3199	1.26167
Case 3	5hmC	119.515	1.37637
Case 3	5hmC	86.023	1.60576
Case 3	5hmC	68.7037	1.60576
Case 3	5hmC	36.3591	1.49107
Case 3	5hmC	176.978	1.94985
Case 3	5hmC	61.3631	1.94985
Case 3	5hmC	122.267	2.06455
Case 3	5hmC	62.166	1.72046
Case 3	5hmC	91.8726	2.06455
Case 3	5hmC	49.2052	2.29395
Case 3	5hmC	90.955	2.75274
Case 3	5hmC	55.6282	2.63804
Case 3	5hmC	79.8294	2.63804
Case 3	5hmC	57.9222	2.63804
Case 3	5hmC	92.7902	2.98213
Case 3	5hmC	73.6357	2.98213
Case 3	5hmC	98.2956	2.40864
Case 3	5hmC	101.966	2.98213
Case 3	5hmC	88.317	2.86743
Case 3	5hmC	114.353	3.21153
Case 3	5hmC	80.9763	3.21153
Case 3	5hmC	75.815	3.21153
Case 3	5hmC	109.536	3.44092
Case 3	5hmC	68.9331	3.78501
Case 3	5hmC	88.8905	4.12911
Case 3	5hmC	144.519	3.55562
Case 3	5hmC	150.712	3.67032
Case 3	5hmC	57.234	5.27608
Case 3	5hmC	47.2553	4.2438
Case 3	5hmC	170.555	5.27608
Case 3	5hmC	42.7821	5.62017
Case 3	5hmC	52.6461	4.4732
Case 3	5hmC	137.866	5.39078
Case 3	5hmC	118.138	5.50547
Case 3	5hmC	172.734	6.07896
Case 3	5hmC	91.5285	7.34063
Case 3	5hmC	126.626	6.07896
Case 3	5hmC	112.403	7.22593
Case 3	5hmC	87.9729	6.30835
Case 3	5hmC	77.7648	6.42305
Case 3	5hmC	47.7141	7.79942
Case 3	5hmC	39.4559	6.76715
Case 3	5hmC	42.438	7.79942
Case 3	5hmC	72.2593	9.17579
Case 3	5hmC	48.8611	8.14351
Case 3	5hmC	47.2553	7.91412
Case 3	5hmC	145.551	10.4375
Case 3	5hmC	206.685	13.7637
Case 3	5hmC	123.185	10.7816
Case 3	5hmC	85.4495	15.9429
Case 3	5hmC	41.5204	22.366
Case 3	5hmC	42.0939	13.7637
Case 3	5hmC	69.8507	28.2156
Case 3	5hmC	134.54	29.2478
Case 3	5hmC	293.969	30.3948
Case 3	5hmC	89.464	28.6743
Case 3	5hmC	40.1441	40.1441
Case 3	5hmC	610.305	41.2911
Case 3	5hmC	188.218	56.7752
Case 3	5hmC	198.541	52.302
Case 3	5hmC	181.107	99.672
Case 1	secondary only	32.3447	0
Case 1	secondary only	36.5885	0
Case 1	secondary only	36.5885	0
Case 1	secondary only	36.9326	0
Case 1	secondary only	37.6207	0
Case 1	secondary only	37.9648	0
Case 1	secondary only	38.3089	0
Case 1	secondary only	38.8824	0
Case 1	secondary only	39.6853	0
Case 1	secondary only	39.8	0
Case 1	secondary only	40.0294	0
Case 1	secondary only	40.0294	0
Case 1	secondary only	40.6029	0
Case 1	secondary only	41.4057	0
Case 1	secondary only	41.5204	0
Case 1	secondary only	42.0939	0
Case 1	secondary only	42.2086	0
Case 1	secondary only	42.3233	0
Case 1	secondary only	42.5527	0
Case 1	secondary only	43.2409	0
Case 1	secondary only	44.1585	0
Case 1	secondary only	44.2732	0
Case 1	secondary only	44.5026	0
Case 1	secondary only	44.6173	0
Case 1	secondary only	45.4202	0
Case 1	secondary only	45.4202	0
Case 1	secondary only	45.5349	0
Case 1	secondary only	45.9936	0
Case 1	secondary only	46.9112	0
Case 1	secondary only	47.0259	0
Case 1	secondary only	47.2553	0
Case 1	secondary only	47.4847	0
Case 1	secondary only	47.9435	0
Case 1	secondary only	48.1729	0
Case 1	secondary only	49.2052	0
Case 1	secondary only	49.2052	0
Case 1	secondary only	49.3199	0
Case 1	secondary only	49.8934	0
Case 1	secondary only	50.1227	0
Case 1	secondary only	50.3521	0
Case 1	secondary only	50.3521	0
Case 1	secondary only	50.4668	0
Case 1	secondary only	50.5815	0
Case 1	secondary only	50.8109	0
Case 1	secondary only	51.0403	0
Case 1	secondary only	51.155	0
Case 1	secondary only	51.3844	0
Case 1	secondary only	51.6138	0
Case 1	secondary only	51.7285	0
Case 1	secondary only	52.0726	0
Case 1	secondary only	52.0726	0
Case 1	secondary only	52.5314	0
Case 1	secondary only	53.2196	0
Case 1	secondary only	53.3343	0
Case 1	secondary only	53.449	0
Case 1	secondary only	53.9078	0
Case 1	secondary only	54.8253	0
Case 1	secondary only	55.2841	0
Case 1	secondary only	55.3988	0
Case 1	secondary only	55.3988	0
Case 1	secondary only	55.3988	0
Case 1	secondary only	55.5135	0
Case 1	secondary only	55.9723	0
Case 1	secondary only	55.9723	0
Case 1	secondary only	56.087	0
Case 1	secondary only	56.3164	0
Case 1	secondary only	56.5458	0
Case 1	secondary only	56.5458	0
Case 1	secondary only	58.1516	0
Case 1	secondary only	58.1516	0
Case 1	secondary only	58.6104	0
Case 1	secondary only	59.9867	0
Case 1	secondary only	60.3308	0
Case 1	secondary only	60.4455	0
Case 1	secondary only	60.9043	0
Case 1	secondary only	61.2484	0
Case 1	secondary only	62.166	0
Case 1	secondary only	63.3129	0
Case 1	secondary only	63.657	0
Case 1	secondary only	64.3452	0
Case 1	secondary only	65.7216	0
Case 1	secondary only	65.8363	0
Case 1	secondary only	66.7539	0
Case 1	secondary only	67.098	0
Case 1	secondary only	69.1625	0
Case 1	secondary only	69.3919	0
Case 1	secondary only	69.3919	0
Case 1	secondary only	69.5066	0
Case 1	secondary only	69.5066	0
Case 1	secondary only	69.6213	0
Case 1	secondary only	70.0801	0
Case 1	secondary only	70.4242	0
Case 1	secondary only	71.4565	0
Case 1	secondary only	71.8006	0
Case 1	secondary only	72.7181	0
Case 1	secondary only	73.0622	0
Case 1	secondary only	73.9798	0
Case 1	secondary only	73.9798	0
Case 1	secondary only	74.5533	0
Case 1	secondary only	75.3562	0
Case 1	secondary only	76.9619	0
Case 1	secondary only	79.0265	0
Case 1	secondary only	80.0588	0
Case 1	secondary only	80.2882	0
Case 1	secondary only	81.091	0
Case 1	secondary only	81.3204	0
Case 1	secondary only	82.238	0
Case 1	secondary only	84.3026	0
Case 1	secondary only	87.9729	0
Case 1	secondary only	88.5464	0
Case 1	secondary only	88.7758	0
Case 1	secondary only	89.808	0
Case 1	secondary only	90.1521	0
Case 1	secondary only	90.1521	0
Case 1	secondary only	93.5931	0
Case 1	secondary only	94.8547	0
Case 1	secondary only	96.9193	0
Case 1	secondary only	97.6075	0
Case 1	secondary only	99.4426	0
Case 1	secondary only	100.59	0
Case 1	secondary only	101.278	0
Case 1	secondary only	102.195	0
Case 1	secondary only	103.113	0
Case 1	secondary only	104.145	0
Case 1	secondary only	104.948	0
Case 1	secondary only	106.898	0
Case 1	secondary only	107.471	0
Case 1	secondary only	109.307	0
Case 1	secondary only	109.651	0
Case 1	secondary only	111.256	0
Case 1	secondary only	113.55	0
Case 1	secondary only	114.124	0
Case 1	secondary only	117.565	0
Case 1	secondary only	118.482	0
Case 1	secondary only	119.171	0
Case 1	secondary only	119.285	0
Case 1	secondary only	122.153	0
Case 1	secondary only	128.117	0
Case 1	secondary only	128.805	0
Case 1	secondary only	131.673	0
Case 1	secondary only	132.361	0
Case 1	secondary only	132.934	0
Case 1	secondary only	133.393	0
Case 1	secondary only	133.967	0
Case 1	secondary only	136.26	0
Case 1	secondary only	140.963	0
Case 1	secondary only	141.422	0
Case 1	secondary only	144.748	0
Case 1	secondary only	150.139	0
Case 1	secondary only	152.433	0
Case 1	secondary only	160.347	0
Case 1	secondary only	162.182	0
Case 1	secondary only	167.688	0
Case 1	secondary only	172.046	0
Case 1	secondary only	174.455	0
Case 1	secondary only	174.799	0
Case 1	secondary only	175.028	0
Case 1	secondary only	181.337	0
Case 1	secondary only	182.369	0
Case 1	secondary only	191.774	0
Case 1	secondary only	194.756	0
Case 1	secondary only	208.52	0
Case 1	secondary only	211.731	0
Case 1	secondary only	212.19	0
Case 1	secondary only	70.883	0.114697
Case 1	secondary only	66.5245	0.114697
Case 1	secondary only	102.081	0.114697
Case 1	secondary only	60.7896	0.114697
Case 1	secondary only	43.3556	0.114697
Case 1	secondary only	65.8363	0.114697
Case 1	secondary only	54.4813	0.114697
Case 1	secondary only	139.931	0.114697
Case 1	secondary only	48.9758	0.114697
Case 1	secondary only	55.2841	0.114697
Case 1	secondary only	83.1556	0.114697
Case 1	secondary only	176.06	0.114697
Case 1	secondary only	38.653	0.114697
Case 1	secondary only	128.461	0.114697
Case 1	secondary only	62.7395	0.114697
Case 1	secondary only	94.5106	0.114697
Case 1	secondary only	53.449	0.114697
Case 1	secondary only	51.8432	0.114697
Case 1	secondary only	180.534	0.114697
Case 1	secondary only	92.4461	0.114697
Case 1	secondary only	130.64	0.229395
Case 1	secondary only	136.031	0.229395
Case 1	secondary only	65.1481	0.229395
Case 1	secondary only	153.236	0.229395
Case 1	secondary only	46.4524	0.229395
Case 1	secondary only	53.7931	0.229395
Case 1	secondary only	128.117	0.344092
Case 1	secondary only	49.4346	0.344092
Case 1	secondary only	87.2847	0.344092
Case 1	secondary only	105.177	0.344092
Case 1	secondary only	55.8576	0.344092
Case 1	secondary only	89.1199	0.344092
Case 1	secondary only	100.016	0.344092
Case 1	secondary only	66.1804	0.344092
Case 1	secondary only	115.386	0.344092
Case 1	secondary only	60.9043	0.344092
Case 1	secondary only	121.809	0.344092
Case 1	secondary only	55.1694	0.458789
Case 1	secondary only	63.1983	0.458789
Case 1	secondary only	61.2484	0.458789
Case 1	secondary only	37.9648	0.458789
Case 1	secondary only	88.2023	0.458789
Case 1	secondary only	74.7827	0.458789
Case 1	secondary only	49.4346	0.458789
Case 1	secondary only	66.4098	0.458789
Case 1	secondary only	175.028	0.573487
Case 1	secondary only	52.7608	0.573487
Case 1	secondary only	72.8328	0.573487
Case 1	secondary only	117.106	0.573487
Case 1	secondary only	196.477	0.573487
Case 1	secondary only	71.3418	0.573487
Case 1	secondary only	202.67	0.573487
Case 1	secondary only	118.138	0.688184
Case 1	secondary only	260.134	0.688184
Case 1	secondary only	40.7176	0.688184
Case 1	secondary only	98.9838	0.802882
Case 1	secondary only	41.1764	0.802882
Case 1	secondary only	259.331	0.802882
Case 1	secondary only	90.7256	0.802882
Case 1	secondary only	50.0081	0.802882
Case 1	secondary only	59.0691	0.917579
Case 1	secondary only	72.0299	0.917579
Case 1	secondary only	48.7464	0.917579
Case 1	secondary only	90.8403	1.03228
Case 1	secondary only	40.8323	1.03228
Case 1	secondary only	60.3308	1.14697
Case 1	secondary only	75.1268	1.03228
Case 1	secondary only	105.866	1.14697
Case 1	secondary only	81.2057	1.14697
Case 1	secondary only	116.991	1.14697
Case 1	secondary only	113.894	1.14697
Case 1	secondary only	48.1729	1.14697
Case 1	secondary only	197.738	1.14697
Case 1	secondary only	55.9723	1.14697
Case 1	secondary only	43.6997	1.03228
Case 1	secondary only	88.2023	1.26167
Case 1	secondary only	85.6789	1.26167
Case 1	secondary only	46.9112	1.37637
Case 1	secondary only	51.4991	1.03228
Case 1	secondary only	108.16	1.26167
Case 1	secondary only	77.5354	1.14697
Case 1	secondary only	134.769	1.49107
Case 1	secondary only	64.5746	1.49107
Case 1	secondary only	42.6674	1.60576
Case 1	secondary only	90.0374	1.49107
Case 1	secondary only	91.2991	1.72046
Case 1	secondary only	49.2052	1.83516
Case 1	secondary only	95.887	1.94985
Case 1	secondary only	109.765	1.94985
Case 1	secondary only	99.5573	2.06455
Case 1	secondary only	59.6426	1.83516
Case 1	secondary only	99.672	2.17925
Case 1	secondary only	60.5602	2.17925
Case 1	secondary only	60.5602	2.40864
Case 1	secondary only	83.385	2.29395
Case 1	secondary only	72.4887	2.17925
Case 1	secondary only	124.217	2.06455
Case 1	secondary only	209.093	2.17925
Case 1	secondary only	68.4743	2.29395
Case 1	secondary only	72.8328	2.75274
Case 1	secondary only	45.3055	1.94985
Case 1	secondary only	101.507	3.21153
Case 1	secondary only	75.5856	2.52334
Case 1	secondary only	68.7037	2.40864
Case 1	secondary only	76.2738	3.09683
Case 1	secondary only	59.9867	2.86743
Case 1	secondary only	166.77	3.09683
Case 1	secondary only	92.3314	2.63804
Case 1	secondary only	166.082	3.44092
Case 1	secondary only	48.0582	3.09683
Case 1	secondary only	99.0985	2.75274
Case 1	secondary only	158.856	3.55562
Case 1	secondary only	99.3279	2.52334
Case 1	secondary only	127.543	2.63804
Case 1	secondary only	62.166	3.32622
Case 1	secondary only	119.744	3.44092
Case 1	secondary only	78.9118	3.78501
Case 1	secondary only	72.2593	3.89971
Case 1	secondary only	66.9833	4.81729
Case 1	secondary only	136.49	5.16138
Case 1	secondary only	57.0046	4.70259
Case 1	secondary only	90.4962	5.73487
Case 1	secondary only	79.4853	6.76715
Case 1	secondary only	143.028	6.53775
Case 1	secondary only	139.816	6.53775
Case 1	secondary only	69.8507	6.88184
Case 1	secondary only	64.9187	8.8317
Case 1	secondary only	31.4271	5.16138
Case 1	secondary only	131.443	7.57003
Case 1	secondary only	204.85	6.30835
Case 1	secondary only	219.301	8.6023
Case 1	secondary only	216.663	11.8138
Case 1	secondary only	78.453	13.649
Case 1	secondary only	59.5279	9.40518
Case 1	secondary only	42.438	12.6167
Case 1	secondary only	66.6392	10.7816
Case 1	secondary only	178.699	13.3049
Case 1	secondary only	188.104	14.3372
Case 1	secondary only	134.884	12.1579
Case 1	secondary only	78.9118	12.1579
Case 1	secondary only	66.1804	12.9608
Case 1	secondary only	122.497	22.1366
Case 1	secondary only	111.945	17.2046
Case 1	secondary only	59.872	16.7458
Case 1	secondary only	148.074	24.5452
Case 1	secondary only	244.994	31.4271
Case 1	secondary only	60.3308	19.8426
Case 1	secondary only	108.848	22.366
Case 1	secondary only	153.694	31.1977
Case 1	secondary only	50.0081	32.5741
Case 1	secondary only	217.007	32.5741
Case 1	secondary only	123.873	34.7533
Case 1	secondary only	174.913	38.9971
Case 1	secondary only	200.491	39.6853
Case 1	secondary only	48.517	48.2876
Case 1	secondary only	211.617	80.0588
Case 1	secondary only	86.023	85.7936
Case 1	secondary only	138.784	138.784

## Sheet: Figure3Supplement5-HCI
High content imaging object list for Figure 3--figure supplement 5. Liver stage cultures infected with P. cynomolgi M/B strain were fixed at eight days post-infection and then stained for either 5-methylcytosine (5mC) or 5-hydroxymethylcytosine (5hmC). 5mC/5hmC area mask is measurement of area of positive signal inside each parasite's 2-dimensional area. Parasites under 105 μm2 were classified as…
P. cynomolgi Experiment	Primary Stain	GAPDH: Individual Parasite Area (um2)	5mC/5hmC Signal: Mask Area (um2)
Exp 1	5hmC	6.76715	6.65245
Exp 1	5hmC	7.57003	7.22593
Exp 1	5hmC	7.57003	0
Exp 1	5hmC	7.79942	7.79942
Exp 1	5hmC	8.25821	2.86743
Exp 1	5hmC	8.37291	4.58789
Exp 1	5hmC	8.6023	0.688184
Exp 1	5hmC	8.8317	7.34063
Exp 1	5hmC	9.17579	4.58789
Exp 1	5hmC	9.29049	0
Exp 1	5hmC	9.40518	1.26167
Exp 1	5hmC	9.74928	9.29049
Exp 1	5hmC	9.86397	9.86397
Exp 1	5hmC	9.97867	9.97867
Exp 1	5hmC	10.4375	4.3585
Exp 1	5hmC	10.5522	0.573487
Exp 1	5hmC	10.6669	0
Exp 1	5hmC	10.8963	9.74928
Exp 1	5hmC	10.8963	10.8963
Exp 1	5hmC	11.0109	0.573487
Exp 1	5hmC	11.0109	3.89971
Exp 1	5hmC	11.0109	11.0109
Exp 1	5hmC	11.1256	10.5522
Exp 1	5hmC	11.2403	11.0109
Exp 1	5hmC	11.2403	0
Exp 1	5hmC	11.355	6.88184
Exp 1	5hmC	11.4697	0.802882
Exp 1	5hmC	11.4697	0
Exp 1	5hmC	11.5844	11.5844
Exp 1	5hmC	11.5844	0
Exp 1	5hmC	11.6991	0
Exp 1	5hmC	11.8138	9.97867
Exp 1	5hmC	11.8138	11.6991
Exp 1	5hmC	11.8138	0
Exp 1	5hmC	11.9285	11.9285
Exp 1	5hmC	12.0432	9.63458
Exp 1	5hmC	12.1579	11.8138
Exp 1	5hmC	12.502	11.0109
Exp 1	5hmC	12.502	12.502
Exp 1	5hmC	12.502	0
Exp 1	5hmC	12.6167	8.9464
Exp 1	5hmC	12.6167	0
Exp 1	5hmC	12.7314	1.83516
Exp 1	5hmC	12.8461	5.62017
Exp 1	5hmC	12.8461	12.7314
Exp 1	5hmC	12.8461	12.8461
Exp 1	5hmC	12.8461	12.8461
Exp 1	5hmC	12.8461	0
Exp 1	5hmC	13.1902	0
Exp 1	5hmC	13.4196	13.1902
Exp 1	5hmC	13.5343	1.94985
Exp 1	5hmC	13.5343	8.9464
Exp 1	5hmC	13.7637	6.76715
Exp 1	5hmC	14.2225	0
Exp 1	5hmC	14.3372	3.78501
Exp 1	5hmC	14.3372	0
Exp 1	5hmC	14.3372	0
Exp 1	5hmC	14.4519	13.0755
Exp 1	5hmC	14.6813	12.7314
Exp 1	5hmC	14.796	14.796
Exp 1	5hmC	14.796	0
Exp 1	5hmC	14.796	0
Exp 1	5hmC	15.2547	15.2547
Exp 1	5hmC	15.3694	10.5522
Exp 1	5hmC	15.3694	14.3372
Exp 1	5hmC	15.3694	15.2547
Exp 1	5hmC	15.5988	15.4841
Exp 1	5hmC	15.8282	8.02882
Exp 1	5hmC	15.9429	11.9285
Exp 1	5hmC	16.0576	14.6813
Exp 1	5hmC	16.287	9.74928
Exp 1	5hmC	16.287	16.287
Exp 1	5hmC	16.7458	12.1579
Exp 1	5hmC	16.7458	15.4841
Exp 1	5hmC	16.8605	14.5666
Exp 1	5hmC	16.8605	16.8605
Exp 1	5hmC	17.0899	14.4519
Exp 1	5hmC	17.0899	15.8282
Exp 1	5hmC	17.0899	16.6311
Exp 1	5hmC	17.0899	0
Exp 1	5hmC	17.2046	0
Exp 1	5hmC	17.434	0
Exp 1	5hmC	18.2369	17.7781
Exp 1	5hmC	18.4663	12.8461
Exp 1	5hmC	18.9251	18.4663
Exp 1	5hmC	18.9251	18.6957
Exp 1	5hmC	19.0398	7.22593
Exp 1	5hmC	19.0398	18.4663
Exp 1	5hmC	19.0398	19.0398
Exp 1	5hmC	19.0398	0
Exp 1	5hmC	19.4986	0.114697
Exp 1	5hmC	19.7279	18.8104
Exp 1	5hmC	19.7279	19.2692
Exp 1	5hmC	19.8426	19.1545
Exp 1	5hmC	19.9573	19.3839
Exp 1	5hmC	20.3014	3.09683
Exp 1	5hmC	20.4161	20.4161
Exp 1	5hmC	20.8749	18.581
Exp 1	5hmC	20.9896	6.65245
Exp 1	5hmC	20.9896	0
Exp 1	5hmC	21.1043	0
Exp 1	5hmC	21.5631	18.4663
Exp 1	5hmC	21.9072	0
Exp 1	5hmC	22.366	19.9573
Exp 1	5hmC	22.7101	0
Exp 1	5hmC	22.8248	15.7135
Exp 1	5hmC	22.9395	17.0899
Exp 1	5hmC	22.9395	22.9395
Exp 1	5hmC	23.0542	16.1723
Exp 1	5hmC	23.2836	0
Exp 1	5hmC	23.6277	7.68472
Exp 1	5hmC	23.8571	0
Exp 1	5hmC	24.2011	23.8571
Exp 1	5hmC	24.3158	21.1043
Exp 1	5hmC	24.3158	0
Exp 1	5hmC	24.5452	24.3158
Exp 1	5hmC	24.6599	0
Exp 1	5hmC	25.5775	14.1078
Exp 1	5hmC	25.5775	24.4305
Exp 1	5hmC	25.5775	0
Exp 1	5hmC	25.6922	0
Exp 1	5hmC	26.0363	13.8784
Exp 1	5hmC	26.151	0
Exp 1	5hmC	26.2657	26.2657
Exp 1	5hmC	26.4951	26.4951
Exp 1	5hmC	26.8392	26.3804
Exp 1	5hmC	26.9539	26.7245
Exp 1	5hmC	26.9539	0
Exp 1	5hmC	27.0686	27.0686
Exp 1	5hmC	27.298	1.60576
Exp 1	5hmC	27.298	0
Exp 1	5hmC	27.4127	27.4127
Exp 1	5hmC	27.5274	1.72046
Exp 1	5hmC	28.2156	27.8715
Exp 1	5hmC	28.4449	28.4449
Exp 1	5hmC	28.6743	0
Exp 1	5hmC	28.6743	0
Exp 1	5hmC	28.9037	28.2156
Exp 1	5hmC	29.0184	0
Exp 1	5hmC	29.3625	23.513
Exp 1	5hmC	30.2801	1.03228
Exp 1	5hmC	30.2801	30.1654
Exp 1	5hmC	30.7389	28.9037
Exp 1	5hmC	31.3124	31.3124
Exp 1	5hmC	31.5418	31.5418
Exp 1	5hmC	32.23	31.6565
Exp 1	5hmC	32.9181	28.9037
Exp 1	5hmC	33.4916	0
Exp 1	5hmC	33.721	8.717
Exp 1	5hmC	33.721	28.1009
Exp 1	5hmC	33.9504	0
Exp 1	5hmC	34.0651	6.53775
Exp 1	5hmC	34.4092	0.573487
Exp 1	5hmC	34.4092	0.688184
Exp 1	5hmC	34.4092	29.2478
Exp 1	5hmC	35.3268	3.67032
Exp 1	5hmC	35.3268	35.2121
Exp 1	5hmC	35.5562	35.5562
Exp 1	5hmC	35.9003	0.458789
Exp 1	5hmC	36.015	4.81729
Exp 1	5hmC	36.2444	13.4196
Exp 1	5hmC	36.8179	0
Exp 1	5hmC	37.2766	37.1619
Exp 1	5hmC	37.6207	37.6207
Exp 1	5hmC	38.3089	0
Exp 1	5hmC	38.4236	30.9683
Exp 1	5hmC	38.4236	38.4236
Exp 1	5hmC	39.1118	4.01441
Exp 1	5hmC	39.4559	0.114697
Exp 1	5hmC	39.5706	39.1118
Exp 1	5hmC	39.9147	19.2692
Exp 1	5hmC	40.1441	11.355
Exp 1	5hmC	40.6029	1.94985
Exp 1	5hmC	41.0617	0
Exp 1	5hmC	41.5204	15.5988
Exp 1	5hmC	41.6351	3.09683
Exp 1	5hmC	41.9792	0
Exp 1	5hmC	42.2086	36.3591
Exp 1	5hmC	43.1262	0.688184
Exp 1	5hmC	43.3556	15.4841
Exp 1	5hmC	43.8144	42.0939
Exp 1	5hmC	44.0438	30.9683
Exp 1	5hmC	45.3055	0
Exp 1	5hmC	45.6496	43.585
Exp 1	5hmC	45.6496	45.6496
Exp 1	5hmC	45.6496	0
Exp 1	5hmC	46.5671	29.7066
Exp 1	5hmC	46.5671	0
Exp 1	5hmC	47.0259	45.5349
Exp 1	5hmC	47.5994	33.6063
Exp 1	5hmC	48.0582	0
Exp 1	5hmC	48.6317	8.02882
Exp 1	5hmC	49.7787	49.7787
Exp 1	5hmC	50.4668	0
Exp 1	5hmC	51.0403	25.3481
Exp 1	5hmC	51.155	1.49107
Exp 1	5hmC	51.6138	48.9758
Exp 1	5hmC	51.9579	0
Exp 1	5hmC	53.449	53.449
Exp 1	5hmC	53.6784	50.0081
Exp 1	5hmC	54.1372	41.2911
Exp 1	5hmC	54.94	0
Exp 1	5hmC	55.0547	17.2046
Exp 1	5hmC	55.2841	0
Exp 1	5hmC	55.3988	10.6669
Exp 1	5hmC	55.3988	0
Exp 1	5hmC	55.6282	35.0974
Exp 1	5hmC	55.8576	33.721
Exp 1	5hmC	56.6605	0
Exp 1	5hmC	57.0046	42.3233
Exp 1	5hmC	57.1193	0
Exp 1	5hmC	57.4634	0
Exp 1	5hmC	58.381	0.229395
Exp 1	5hmC	58.4957	20.6455
Exp 1	5hmC	59.7573	48.6317
Exp 1	5hmC	59.9867	33.8357
Exp 1	5hmC	60.3308	0.344092
Exp 1	5hmC	60.6749	10.7816
Exp 1	5hmC	61.4778	40.7176
Exp 1	5hmC	63.4276	11.4697
Exp 1	5hmC	63.4276	0
Exp 1	5hmC	64.1158	0.917579
Exp 1	5hmC	66.8686	3.78501
Exp 1	5hmC	68.2449	32.23
Exp 1	5hmC	68.9331	68.9331
Exp 1	5hmC	69.9654	7.79942
Exp 1	5hmC	72.9475	0
Exp 1	5hmC	73.4063	1.37637
Exp 1	5hmC	79.0265	8.8317
Exp 1	5hmC	79.4853	0
Exp 1	5hmC	79.7147	71.3418
Exp 1	5hmC	81.5498	69.2772
Exp 1	5hmC	84.8761	41.6351
Exp 1	5hmC	86.1377	1.60576
Exp 1	5hmC	88.7758	0
Exp 1	5hmC	90.8403	15.5988
Exp 1	5hmC	98.1809	98.0663
Exp 1	5hmC	101.851	23.513
Exp 1	5hmC	102.539	0.458789
Exp 1	5hmC	104.145	23.7424
Exp 1	5hmC	105.866	0
Exp 1	5hmC	107.701	0
Exp 1	5hmC	109.421	0
Exp 1	5hmC	117.45	7.68472
Exp 1	5hmC	124.332	0
Exp 1	5hmC	130.067	85.9083
Exp 1	5hmC	131.558	125.479
Exp 1	5hmC	135.687	3.55562
Exp 1	5hmC	136.834	21.5631
Exp 1	5hmC	144.289	12.9608
Exp 1	5hmC	144.863	0
Exp 1	5hmC	145.436	145.436
Exp 1	5hmC	148.992	102.195
Exp 1	5hmC	158.626	0
Exp 1	5hmC	188.218	71.3418
Exp 1	5hmC	190.054	0
Exp 1	5hmC	191.545	110.339
Exp 1	5hmC	195.903	16.8605
Exp 1	5hmC	207.373	0
Exp 1	5hmC	226.298	157.021
Exp 1	5hmC	273.783	26.151
Exp 1	5hmC	301.654	10.6669
Exp 1	5hmC	396.968	129.379
Exp 1	5hmC	516.023	102.081
Exp 1	5hmC	537.701	50.4668
Exp 1	5hmC	1095.7	107.586
Exp 1	5mC	6.30835	3.67032
Exp 1	5mC	7.68472	2.06455
Exp 1	5mC	8.02882	3.67032
Exp 1	5mC	8.25821	8.25821
Exp 1	5mC	8.8317	1.83516
Exp 1	5mC	9.51988	0
Exp 1	5mC	9.97867	9.97867
Exp 1	5mC	10.2081	4.4732
Exp 1	5mC	10.4375	9.97867
Exp 1	5mC	10.4375	10.0934
Exp 1	5mC	10.5522	2.52334
Exp 1	5mC	11.2403	0.573487
Exp 1	5mC	11.355	11.355
Exp 1	5mC	11.5844	1.72046
Exp 1	5mC	11.5844	9.97867
Exp 1	5mC	11.8138	1.60576
Exp 1	5mC	12.0432	3.32622
Exp 1	5mC	12.7314	12.7314
Exp 1	5mC	12.7314	0
Exp 1	5mC	13.3049	13.3049
Exp 1	5mC	13.649	0
Exp 1	5mC	14.1078	14.1078
Exp 1	5mC	14.4519	13.7637
Exp 1	5mC	15.2547	2.40864
Exp 1	5mC	15.5988	15.5988
Exp 1	5mC	15.8282	15.2547
Exp 1	5mC	16.0576	1.60576
Exp 1	5mC	16.0576	13.8784
Exp 1	5mC	16.287	2.63804
Exp 1	5mC	16.4017	16.1723
Exp 1	5mC	16.6311	0
Exp 1	5mC	16.7458	0
Exp 1	5mC	16.7458	0
Exp 1	5mC	17.2046	14.9107
Exp 1	5mC	17.434	16.7458
Exp 1	5mC	18.0075	3.67032
Exp 1	5mC	18.0075	0
Exp 1	5mC	18.2369	13.649
Exp 1	5mC	18.8104	2.17925
Exp 1	5mC	18.8104	3.55562
Exp 1	5mC	18.8104	3.67032
Exp 1	5mC	19.0398	16.0576
Exp 1	5mC	19.1545	2.52334
Exp 1	5mC	19.1545	0
Exp 1	5mC	19.2692	11.2403
Exp 1	5mC	19.4986	8.02882
Exp 1	5mC	19.6133	4.3585
Exp 1	5mC	19.6133	6.88184
Exp 1	5mC	20.072	3.78501
Exp 1	5mC	20.3014	0
Exp 1	5mC	20.7602	1.37637
Exp 1	5mC	20.7602	20.3014
Exp 1	5mC	21.1043	0.344092
Exp 1	5mC	21.5631	15.5988
Exp 1	5mC	21.6778	3.32622
Exp 1	5mC	21.7925	20.7602
Exp 1	5mC	21.9072	14.6813
Exp 1	5mC	22.0219	21.7925
Exp 1	5mC	22.366	5.27608
Exp 1	5mC	22.366	19.2692
Exp 1	5mC	22.4807	22.4807
Exp 1	5mC	22.8248	2.06455
Exp 1	5mC	23.0542	23.0542
Exp 1	5mC	23.3983	0.229395
Exp 1	5mC	23.513	9.86397
Exp 1	5mC	23.8571	2.40864
Exp 1	5mC	23.8571	0
Exp 1	5mC	24.3158	0
Exp 1	5mC	24.4305	3.44092
Exp 1	5mC	24.5452	1.72046
Exp 1	5mC	24.6599	21.6778
Exp 1	5mC	24.7746	2.52334
Exp 1	5mC	24.8893	4.01441
Exp 1	5mC	25.1187	7.22593
Exp 1	5mC	25.1187	7.79942
Exp 1	5mC	25.5775	0
Exp 1	5mC	25.9216	2.98213
Exp 1	5mC	26.0363	21.219
Exp 1	5mC	26.9539	25.8069
Exp 1	5mC	28.3302	10.6669
Exp 1	5mC	28.4449	4.58789
Exp 1	5mC	28.5596	6.07896
Exp 1	5mC	28.6743	28.4449
Exp 1	5mC	29.4772	27.0686
Exp 1	5mC	30.0507	17.6634
Exp 1	5mC	30.3948	16.8605
Exp 1	5mC	31.3124	23.1689
Exp 1	5mC	32.1153	17.7781
Exp 1	5mC	32.3447	5.73487
Exp 1	5mC	32.9181	9.63458
Exp 1	5mC	33.1475	1.72046
Exp 1	5mC	34.0651	0.229395
Exp 1	5mC	34.1798	27.9862
Exp 1	5mC	35.0974	35.0974
Exp 1	5mC	35.5562	25.5775
Exp 1	5mC	35.7856	31.1977
Exp 1	5mC	37.1619	0
Exp 1	5mC	37.2766	29.4772
Exp 1	5mC	37.8501	12.1579
Exp 1	5mC	38.653	9.51988
Exp 1	5mC	41.0617	40.6029
Exp 1	5mC	41.4057	41.1764
Exp 1	5mC	41.7498	19.4986
Exp 1	5mC	43.0115	19.9573
Exp 1	5mC	43.2409	4.81729
Exp 1	5mC	43.585	0.114697
Exp 1	5mC	44.0438	0
Exp 1	5mC	44.2732	0
Exp 1	5mC	44.9614	37.3913
Exp 1	5mC	47.0259	0.229395
Exp 1	5mC	47.5994	0
Exp 1	5mC	47.7141	13.8784
Exp 1	5mC	48.0582	10.3228
Exp 1	5mC	49.0905	9.74928
Exp 1	5mC	50.3521	15.4841
Exp 1	5mC	51.4991	23.8571
Exp 1	5mC	58.1516	0.344092
Exp 1	5mC	63.1983	7.57003
Exp 1	5mC	64.9187	20.072
Exp 1	5mC	67.6714	5.04668
Exp 1	5mC	81.6645	0
Exp 1	5mC	96.2311	46.3377
Exp 1	5mC	100.131	0
Exp 1	5mC	102.425	20.072
Exp 1	5mC	122.497	58.2663
Exp 1	5mC	150.254	32.5741
Exp 1	5mC	150.483	106.324
Exp 1	5mC	166.311	157.135
Exp 1	5mC	199.918	77.7648
Exp 1	5mC	215.058	84.8761
Exp 1	5mC	250.843	250.728
Exp 1	secondary only	7.57003	0
Exp 1	secondary only	8.02882	0.344092
Exp 1	secondary only	8.25821	5.73487
Exp 1	secondary only	8.37291	0
Exp 1	secondary only	8.48761	0
Exp 1	secondary only	8.6023	8.02882
Exp 1	secondary only	8.8317	0
Exp 1	secondary only	9.06109	1.26167
Exp 1	secondary only	9.17579	5.96426
Exp 1	secondary only	9.17579	9.17579
Exp 1	secondary only	9.29049	0
Exp 1	secondary only	9.40518	5.39078
Exp 1	secondary only	9.40518	0
Exp 1	secondary only	9.40518	0
Exp 1	secondary only	9.51988	0.802882
Exp 1	secondary only	9.51988	0
Exp 1	secondary only	9.63458	0.802882
Exp 1	secondary only	9.63458	0
Exp 1	secondary only	9.74928	3.32622
Exp 1	secondary only	9.86397	2.17925
Exp 1	secondary only	10.0934	7.57003
Exp 1	secondary only	10.2081	0.458789
Exp 1	secondary only	10.2081	0
Exp 1	secondary only	10.3228	2.98213
Exp 1	secondary only	10.5522	2.75274
Exp 1	secondary only	10.5522	0
Exp 1	secondary only	10.7816	4.12911
Exp 1	secondary only	10.8963	8.37291
Exp 1	secondary only	10.8963	0
Exp 1	secondary only	11.2403	0.344092
Exp 1	secondary only	11.4697	0
Exp 1	secondary only	11.5844	11.1256
Exp 1	secondary only	11.6991	0.229395
Exp 1	secondary only	11.9285	0.114697
Exp 1	secondary only	12.0432	5.04668
Exp 1	secondary only	12.0432	0
Exp 1	secondary only	12.1579	4.70259
Exp 1	secondary only	12.1579	0
Exp 1	secondary only	12.502	0.802882
Exp 1	secondary only	12.502	12.1579
Exp 1	secondary only	12.6167	0
Exp 1	secondary only	12.7314	0.114697
Exp 1	secondary only	12.7314	5.04668
Exp 1	secondary only	13.0755	13.0755
Exp 1	secondary only	13.0755	0
Exp 1	secondary only	13.1902	0
Exp 1	secondary only	13.3049	13.1902
Exp 1	secondary only	13.8784	0
Exp 1	secondary only	14.1078	1.83516
Exp 1	secondary only	14.1078	8.02882
Exp 1	secondary only	14.1078	9.97867
Exp 1	secondary only	14.2225	8.02882
Exp 1	secondary only	14.3372	1.26167
Exp 1	secondary only	14.3372	0
Exp 1	secondary only	14.6813	0.458789
Exp 1	secondary only	15.1401	2.52334
Exp 1	secondary only	15.4841	11.8138
Exp 1	secondary only	15.4841	0
Exp 1	secondary only	15.7135	0.114697
Exp 1	secondary only	15.7135	12.0432
Exp 1	secondary only	15.8282	10.0934
Exp 1	secondary only	15.8282	15.3694
Exp 1	secondary only	15.8282	0
Exp 1	secondary only	15.9429	11.0109
Exp 1	secondary only	15.9429	11.4697
Exp 1	secondary only	16.0576	9.86397
Exp 1	secondary only	16.0576	0
Exp 1	secondary only	16.1723	5.50547
Exp 1	secondary only	16.1723	11.6991
Exp 1	secondary only	16.287	10.6669
Exp 1	secondary only	16.9752	9.17579
Exp 1	secondary only	16.9752	0
Exp 1	secondary only	17.0899	2.29395
Exp 1	secondary only	17.3193	0
Exp 1	secondary only	17.5487	9.40518
Exp 1	secondary only	17.5487	17.5487
Exp 1	secondary only	17.8928	0.688184
Exp 1	secondary only	18.2369	4.4732
Exp 1	secondary only	18.2369	0
Exp 1	secondary only	18.2369	0
Exp 1	secondary only	18.3516	2.06455
Exp 1	secondary only	18.4663	0
Exp 1	secondary only	19.0398	5.27608
Exp 1	secondary only	19.0398	0
Exp 1	secondary only	19.1545	1.03228
Exp 1	secondary only	19.2692	0
Exp 1	secondary only	19.3839	2.17925
Exp 1	secondary only	19.6133	1.60576
Exp 1	secondary only	19.6133	7.91412
Exp 1	secondary only	19.7279	15.2547
Exp 1	secondary only	20.072	8.48761
Exp 1	secondary only	20.3014	7.79942
Exp 1	secondary only	20.3014	0
Exp 1	secondary only	20.6455	0
Exp 1	secondary only	20.6455	0
Exp 1	secondary only	20.7602	12.502
Exp 1	secondary only	20.9896	0.229395
Exp 1	secondary only	20.9896	0
Exp 1	secondary only	21.219	0
Exp 1	secondary only	21.4484	6.53775
Exp 1	secondary only	21.4484	15.9429
Exp 1	secondary only	21.5631	0
Exp 1	secondary only	22.0219	0
Exp 1	secondary only	22.7101	0
Exp 1	secondary only	22.8248	4.70259
Exp 1	secondary only	23.0542	0
Exp 1	secondary only	23.3983	8.14351
Exp 1	secondary only	23.3983	9.29049
Exp 1	secondary only	23.7424	0
Exp 1	secondary only	24.4305	17.8928
Exp 1	secondary only	24.5452	0.344092
Exp 1	secondary only	24.6599	16.6311
Exp 1	secondary only	24.7746	0
Exp 1	secondary only	24.8893	0
Exp 1	secondary only	25.1187	0
Exp 1	secondary only	25.2334	0
Exp 1	secondary only	25.3481	4.4732
Exp 1	secondary only	25.3481	8.48761
Exp 1	secondary only	25.3481	20.9896
Exp 1	secondary only	25.6922	0.344092
Exp 1	secondary only	25.8069	22.5954
Exp 1	secondary only	25.9216	0
Exp 1	secondary only	26.3804	16.9752
Exp 1	secondary only	26.3804	0
Exp 1	secondary only	26.6098	0
Exp 1	secondary only	26.7245	0
Exp 1	secondary only	27.0686	6.07896
Exp 1	secondary only	27.298	9.86397
Exp 1	secondary only	27.298	0
Exp 1	secondary only	27.298	0
Exp 1	secondary only	27.5274	25.5775
Exp 1	secondary only	27.6421	0
Exp 1	secondary only	27.7568	12.2726
Exp 1	secondary only	28.6743	0
Exp 1	secondary only	29.3625	7.68472
Exp 1	secondary only	29.7066	0
Exp 1	secondary only	29.7066	0
Exp 1	secondary only	29.8213	0
Exp 1	secondary only	29.8213	0
Exp 1	secondary only	29.8213	0
Exp 1	secondary only	30.0507	0
Exp 1	secondary only	30.1654	0.573487
Exp 1	secondary only	30.2801	21.5631
Exp 1	secondary only	30.6242	21.7925
Exp 1	secondary only	31.083	23.2836
Exp 1	secondary only	31.083	0
Exp 1	secondary only	31.3124	0
Exp 1	secondary only	31.4271	0
Exp 1	secondary only	31.8859	0
Exp 1	secondary only	32.6888	0
Exp 1	secondary only	32.8034	0.573487
Exp 1	secondary only	33.2622	0.229395
Exp 1	secondary only	33.2622	0
Exp 1	secondary only	33.3769	0
Exp 1	secondary only	33.8357	2.17925
Exp 1	secondary only	33.9504	14.2225
Exp 1	secondary only	34.4092	0
Exp 1	secondary only	34.868	0
Exp 1	secondary only	34.868	0
Exp 1	secondary only	35.0974	0
Exp 1	secondary only	35.7856	0
Exp 1	secondary only	35.9003	2.29395
Exp 1	secondary only	36.3591	35.2121
Exp 1	secondary only	36.3591	0
Exp 1	secondary only	36.4738	34.1798
Exp 1	secondary only	36.9326	0
Exp 1	secondary only	37.2766	18.581
Exp 1	secondary only	37.6207	0
Exp 1	secondary only	38.1942	0
Exp 1	secondary only	38.7677	35.3268
Exp 1	secondary only	38.7677	0
Exp 1	secondary only	38.8824	35.5562
Exp 1	secondary only	38.9971	0
Exp 1	secondary only	39.4559	0
Exp 1	secondary only	39.5706	16.9752
Exp 1	secondary only	39.5706	0
Exp 1	secondary only	39.6853	0
Exp 1	secondary only	39.8	0
Exp 1	secondary only	40.2588	36.3591
Exp 1	secondary only	40.2588	0
Exp 1	secondary only	40.4882	13.9931
Exp 1	secondary only	40.4882	0
Exp 1	secondary only	40.7176	2.17925
Exp 1	secondary only	41.1764	2.29395
Exp 1	secondary only	41.2911	0
Exp 1	secondary only	41.5204	23.6277
Exp 1	secondary only	41.6351	0
Exp 1	secondary only	41.6351	0
Exp 1	secondary only	41.6351	0
Exp 1	secondary only	41.9792	34.868
Exp 1	secondary only	42.0939	36.3591
Exp 1	secondary only	42.438	2.63804
Exp 1	secondary only	42.6674	0
Exp 1	secondary only	43.9291	1.37637
Exp 1	secondary only	44.0438	0
Exp 1	secondary only	44.6173	0
Exp 1	secondary only	44.732	0
Exp 1	secondary only	44.8467	0
Exp 1	secondary only	45.4202	38.9971
Exp 1	secondary only	45.4202	0
Exp 1	secondary only	45.4202	0
Exp 1	secondary only	45.6496	0
Exp 1	secondary only	46.223	26.9539
Exp 1	secondary only	46.223	0
Exp 1	secondary only	46.3377	1.26167
Exp 1	secondary only	46.6818	0
Exp 1	secondary only	47.1406	0
Exp 1	secondary only	47.4847	0
Exp 1	secondary only	47.7141	33.6063
Exp 1	secondary only	47.9435	0
Exp 1	secondary only	48.0582	6.65245
Exp 1	secondary only	48.2876	0
Exp 1	secondary only	48.2876	0
Exp 1	secondary only	48.517	0
Exp 1	secondary only	48.7464	0
Exp 1	secondary only	48.7464	0
Exp 1	secondary only	48.8611	0
Exp 1	secondary only	49.3199	0
Exp 1	secondary only	49.5493	0
Exp 1	secondary only	49.8934	4.01441
Exp 1	secondary only	50.0081	0.917579
Exp 1	secondary only	50.1227	2.86743
Exp 1	secondary only	50.3521	0
Exp 1	secondary only	50.4668	0
Exp 1	secondary only	50.5815	0
Exp 1	secondary only	50.6962	0
Exp 1	secondary only	51.2697	30.7389
Exp 1	secondary only	51.2697	0
Exp 1	secondary only	51.4991	0
Exp 1	secondary only	52.0726	0
Exp 1	secondary only	52.302	0
Exp 1	secondary only	52.9902	0
Exp 1	secondary only	53.1049	0
Exp 1	secondary only	53.1049	0
Exp 1	secondary only	54.1372	0
Exp 1	secondary only	54.2519	4.3585
Exp 1	secondary only	54.8253	0
Exp 1	secondary only	55.1694	0
Exp 1	secondary only	55.6282	0
Exp 1	secondary only	55.7429	0
Exp 1	secondary only	56.087	0
Exp 1	secondary only	57.4634	0
Exp 1	secondary only	58.2663	0
Exp 1	secondary only	58.8397	0
Exp 1	secondary only	59.7573	0
Exp 1	secondary only	59.9867	0
Exp 1	secondary only	60.1014	0
Exp 1	secondary only	61.4778	0
Exp 1	secondary only	61.5925	32.23
Exp 1	secondary only	62.166	0
Exp 1	secondary only	62.9689	0
Exp 1	secondary only	63.0836	6.42305
Exp 1	secondary only	63.4276	5.73487
Exp 1	secondary only	64.2305	58.8397
Exp 1	secondary only	65.6069	59.2985
Exp 1	secondary only	66.0657	0
Exp 1	secondary only	66.8686	0
Exp 1	secondary only	68.1302	0
Exp 1	secondary only	68.2449	0
Exp 1	secondary only	68.3596	3.44092
Exp 1	secondary only	68.7037	0
Exp 1	secondary only	69.1625	0
Exp 1	secondary only	71.6859	0
Exp 1	secondary only	72.1446	0
Exp 1	secondary only	72.8328	0
Exp 1	secondary only	73.0622	0
Exp 1	secondary only	73.0622	0
Exp 1	secondary only	73.1769	0
Exp 1	secondary only	73.1769	0
Exp 1	secondary only	74.4386	1.26167
Exp 1	secondary only	74.668	7.68472
Exp 1	secondary only	75.9297	16.6311
Exp 1	secondary only	76.3885	0
Exp 1	secondary only	77.5354	0
Exp 1	secondary only	79.4853	0
Exp 1	secondary only	79.8294	0
Exp 1	secondary only	81.4351	0
Exp 1	secondary only	81.6645	0
Exp 1	secondary only	81.8939	0
Exp 1	secondary only	86.2524	0
Exp 1	secondary only	86.8259	0
Exp 1	secondary only	87.2847	0.114697
Exp 1	secondary only	87.9729	0.229395
Exp 1	secondary only	89.464	0
Exp 1	secondary only	90.4962	0
Exp 1	secondary only	91.5285	0
Exp 1	secondary only	92.9049	0
Exp 1	secondary only	95.5429	0
Exp 1	secondary only	97.4928	4.3585
Exp 1	secondary only	98.2956	0
Exp 1	secondary only	98.525	0
Exp 1	secondary only	101.966	0
Exp 1	secondary only	102.654	0
Exp 1	secondary only	103.228	0
Exp 1	secondary only	103.916	0
Exp 1	secondary only	107.93	0
Exp 1	secondary only	108.274	0
Exp 1	secondary only	116.303	0
Exp 1	secondary only	123.873	0
Exp 1	secondary only	124.217	0
Exp 1	secondary only	126.052	16.5164
Exp 1	secondary only	129.264	0
Exp 1	secondary only	130.296	0
Exp 1	secondary only	130.755	1.14697
Exp 1	secondary only	132.82	0
Exp 1	secondary only	137.293	0
Exp 1	secondary only	137.522	0
Exp 1	secondary only	140.045	0
Exp 1	secondary only	142.225	0
Exp 1	secondary only	155.874	35.2121
Exp 1	secondary only	160.691	0
Exp 1	secondary only	165.279	0
Exp 1	secondary only	165.738	0
Exp 1	secondary only	166.311	0
Exp 1	secondary only	169.523	0
Exp 1	secondary only	171.931	0
Exp 1	secondary only	174.684	0
Exp 1	secondary only	182.484	0
Exp 1	secondary only	183.516	0
Exp 1	secondary only	183.86	38.4236
Exp 1	secondary only	189.021	0
Exp 1	secondary only	192.118	0.802882
Exp 1	secondary only	203.014	0
Exp 1	secondary only	213.911	5.84957
Exp 1	secondary only	213.911	34.9827
Exp 1	secondary only	214.369	0
Exp 1	secondary only	218.957	16.287
Exp 1	secondary only	225.61	0
Exp 1	secondary only	241.209	21.219
Exp 1	secondary only	262.428	0
Exp 1	secondary only	264.377	0
Exp 1	secondary only	264.492	6.30835
Exp 1	secondary only	282.844	0
Exp 1	secondary only	291.905	0
Exp 1	secondary only	293.281	0
Exp 1	secondary only	293.969	0
Exp 1	secondary only	325.282	0
Exp 1	secondary only	372.308	0
Exp 1	secondary only	485.858	0
Exp 1	secondary only	517.515	12.2726
Exp 1	secondary only	577.387	0
Exp 1	secondary only	734.407	0
Exp 1	secondary only	856.675	0
Exp 2	5hmC	20.4161	0
Exp 2	5hmC	21.1043	0
Exp 2	5hmC	21.6778	5.62017
Exp 2	5hmC	22.1366	0
Exp 2	5hmC	22.4807	0
Exp 2	5hmC	22.8248	0.573487
Exp 2	5hmC	22.9395	0
Exp 2	5hmC	22.9395	0
Exp 2	5hmC	23.1689	0
Exp 2	5hmC	23.2836	0
Exp 2	5hmC	23.513	0
Exp 2	5hmC	23.6277	0
Exp 2	5hmC	23.8571	0
Exp 2	5hmC	24.6599	0
Exp 2	5hmC	24.8893	0
Exp 2	5hmC	24.8893	0
Exp 2	5hmC	25.1187	0
Exp 2	5hmC	25.1187	0
Exp 2	5hmC	25.3481	0
Exp 2	5hmC	25.3481	0
Exp 2	5hmC	25.3481	0
Exp 2	5hmC	25.8069	0
Exp 2	5hmC	26.151	1.14697
Exp 2	5hmC	26.151	0
Exp 2	5hmC	26.2657	0
Exp 2	5hmC	26.2657	0
Exp 2	5hmC	26.6098	0
Exp 2	5hmC	26.6098	0.114697
Exp 2	5hmC	27.0686	0
Exp 2	5hmC	27.1833	1.26167
Exp 2	5hmC	27.298	0
Exp 2	5hmC	27.298	0
Exp 2	5hmC	27.4127	0
Exp 2	5hmC	27.5274	0
Exp 2	5hmC	27.5274	0
Exp 2	5hmC	27.6421	0
Exp 2	5hmC	28.3302	0
Exp 2	5hmC	28.789	0
Exp 2	5hmC	28.9037	0
Exp 2	5hmC	28.9037	0
Exp 2	5hmC	29.3625	0
Exp 2	5hmC	29.7066	0
Exp 2	5hmC	30.1654	0
Exp 2	5hmC	30.1654	0
Exp 2	5hmC	30.5095	0
Exp 2	5hmC	30.6242	0
Exp 2	5hmC	30.8536	0
Exp 2	5hmC	30.9683	0
Exp 2	5hmC	31.3124	7.91412
Exp 2	5hmC	31.3124	0
Exp 2	5hmC	31.4271	0
Exp 2	5hmC	31.4271	0
Exp 2	5hmC	31.5418	0
Exp 2	5hmC	31.7712	20.5308
Exp 2	5hmC	31.7712	0
Exp 2	5hmC	32.1153	0
Exp 2	5hmC	32.1153	0
Exp 2	5hmC	32.4594	0
Exp 2	5hmC	32.4594	0
Exp 2	5hmC	32.4594	0
Exp 2	5hmC	32.5741	0
Exp 2	5hmC	32.8034	0
Exp 2	5hmC	32.9181	0
Exp 2	5hmC	33.0328	0
Exp 2	5hmC	33.4916	0
Exp 2	5hmC	33.6063	0
Exp 2	5hmC	33.721	0
Exp 2	5hmC	34.0651	0
Exp 2	5hmC	34.1798	0.344092
Exp 2	5hmC	34.2945	0
Exp 2	5hmC	34.2945	0
Exp 2	5hmC	34.5239	0
Exp 2	5hmC	34.6386	0
Exp 2	5hmC	34.6386	0
Exp 2	5hmC	34.7533	0
Exp 2	5hmC	34.868	2.29395
Exp 2	5hmC	35.2121	0
Exp 2	5hmC	35.4415	0
Exp 2	5hmC	35.5562	6.42305
Exp 2	5hmC	35.6709	0
Exp 2	5hmC	35.9003	0
Exp 2	5hmC	36.015	0
Exp 2	5hmC	36.1297	0
Exp 2	5hmC	36.4738	0
Exp 2	5hmC	36.4738	0
Exp 2	5hmC	36.4738	0
Exp 2	5hmC	36.7032	0
Exp 2	5hmC	36.9326	0
Exp 2	5hmC	37.1619	0
Exp 2	5hmC	37.3913	0
Exp 2	5hmC	37.506	0
Exp 2	5hmC	37.6207	0
Exp 2	5hmC	37.6207	0
Exp 2	5hmC	37.7354	0
Exp 2	5hmC	37.9648	0
Exp 2	5hmC	38.0795	0
Exp 2	5hmC	38.1942	0
Exp 2	5hmC	38.3089	0
Exp 2	5hmC	38.3089	0
Exp 2	5hmC	38.4236	0
Exp 2	5hmC	38.7677	0
Exp 2	5hmC	38.9971	0
Exp 2	5hmC	38.9971	0
Exp 2	5hmC	39.1118	0
Exp 2	5hmC	39.2265	0
Exp 2	5hmC	39.3412	0
Exp 2	5hmC	39.3412	0
Exp 2	5hmC	39.4559	0
Exp 2	5hmC	39.5706	0
Exp 2	5hmC	39.6853	0
Exp 2	5hmC	39.8	0
Exp 2	5hmC	39.8	0
Exp 2	5hmC	39.9147	0
Exp 2	5hmC	40.1441	0
Exp 2	5hmC	40.2588	0
Exp 2	5hmC	40.2588	0
Exp 2	5hmC	40.4882	0
Exp 2	5hmC	40.6029	0
Exp 2	5hmC	40.6029	0
Exp 2	5hmC	41.1764	0
Exp 2	5hmC	41.4057	0
Exp 2	5hmC	41.5204	0
Exp 2	5hmC	41.7498	0
Exp 2	5hmC	41.7498	16.4017
Exp 2	5hmC	41.7498	0
Exp 2	5hmC	41.9792	6.53775
Exp 2	5hmC	41.9792	0
Exp 2	5hmC	42.0939	0
Exp 2	5hmC	42.0939	0
Exp 2	5hmC	42.0939	0
Exp 2	5hmC	42.2086	0
Exp 2	5hmC	42.2086	0
Exp 2	5hmC	42.5527	0
Exp 2	5hmC	42.6674	0
Exp 2	5hmC	43.0115	0
Exp 2	5hmC	43.1262	0
Exp 2	5hmC	43.1262	0
Exp 2	5hmC	43.4703	34.7533
Exp 2	5hmC	43.6997	0
Exp 2	5hmC	43.6997	0
Exp 2	5hmC	43.8144	0
Exp 2	5hmC	43.8144	0
Exp 2	5hmC	43.8144	0
Exp 2	5hmC	44.0438	0
Exp 2	5hmC	44.1585	0
Exp 2	5hmC	44.2732	0
Exp 2	5hmC	44.2732	0
Exp 2	5hmC	44.5026	0
Exp 2	5hmC	44.732	0
Exp 2	5hmC	44.732	0
Exp 2	5hmC	45.5349	0
Exp 2	5hmC	45.7643	0
Exp 2	5hmC	45.8789	0
Exp 2	5hmC	46.1083	2.40864
Exp 2	5hmC	46.3377	0
Exp 2	5hmC	46.3377	0
Exp 2	5hmC	46.4524	0
Exp 2	5hmC	46.5671	2.98213
Exp 2	5hmC	46.5671	0
Exp 2	5hmC	46.5671	0
Exp 2	5hmC	46.7965	0
Exp 2	5hmC	46.7965	0
Exp 2	5hmC	47.1406	0
Exp 2	5hmC	47.37	0
Exp 2	5hmC	47.4847	0
Exp 2	5hmC	47.5994	0
Exp 2	5hmC	48.0582	0
Exp 2	5hmC	48.1729	0
Exp 2	5hmC	48.1729	0
Exp 2	5hmC	48.2876	0
Exp 2	5hmC	48.6317	0
Exp 2	5hmC	48.7464	0
Exp 2	5hmC	48.7464	0
Exp 2	5hmC	48.8611	0
Exp 2	5hmC	49.3199	0
Exp 2	5hmC	49.7787	0
Exp 2	5hmC	49.7787	1.26167
Exp 2	5hmC	49.8934	0
Exp 2	5hmC	50.1227	0
Exp 2	5hmC	50.2374	1.49107
Exp 2	5hmC	50.5815	0
Exp 2	5hmC	50.5815	0
Exp 2	5hmC	50.6962	0
Exp 2	5hmC	50.6962	0
Exp 2	5hmC	50.9256	0
Exp 2	5hmC	50.9256	0
Exp 2	5hmC	50.9256	0
Exp 2	5hmC	51.155	0
Exp 2	5hmC	51.155	0
Exp 2	5hmC	51.3844	4.93199
Exp 2	5hmC	51.3844	0
Exp 2	5hmC	51.3844	0
Exp 2	5hmC	51.8432	0
Exp 2	5hmC	51.8432	0
Exp 2	5hmC	51.8432	0
Exp 2	5hmC	51.9579	0
Exp 2	5hmC	52.0726	20.3014
Exp 2	5hmC	52.1873	0
Exp 2	5hmC	52.302	0
Exp 2	5hmC	52.5314	0
Exp 2	5hmC	52.7608	0
Exp 2	5hmC	52.7608	0
Exp 2	5hmC	52.8755	0
Exp 2	5hmC	52.8755	0
Exp 2	5hmC	52.9902	0
Exp 2	5hmC	52.9902	0
Exp 2	5hmC	53.1049	0
Exp 2	5hmC	53.2196	0
Exp 2	5hmC	53.2196	2.86743
Exp 2	5hmC	53.3343	0
Exp 2	5hmC	53.5637	0
Exp 2	5hmC	53.6784	0
Exp 2	5hmC	53.6784	0
Exp 2	5hmC	53.7931	0
Exp 2	5hmC	54.0225	0
Exp 2	5hmC	54.0225	0
Exp 2	5hmC	54.1372	0
Exp 2	5hmC	54.2519	0
Exp 2	5hmC	54.2519	0
Exp 2	5hmC	54.4813	0
Exp 2	5hmC	54.5959	11.5844
Exp 2	5hmC	54.5959	0
Exp 2	5hmC	54.8253	0
Exp 2	5hmC	54.94	0
Exp 2	5hmC	55.0547	0
Exp 2	5hmC	55.0547	0
Exp 2	5hmC	55.1694	0
Exp 2	5hmC	55.1694	0
Exp 2	5hmC	55.2841	28.789
Exp 2	5hmC	55.2841	4.58789
Exp 2	5hmC	55.3988	0
Exp 2	5hmC	55.6282	0
Exp 2	5hmC	55.7429	0
Exp 2	5hmC	55.8576	0
Exp 2	5hmC	55.8576	0
Exp 2	5hmC	56.087	0
Exp 2	5hmC	56.2017	0
Exp 2	5hmC	56.2017	0
Exp 2	5hmC	56.3164	0
Exp 2	5hmC	56.3164	0
Exp 2	5hmC	56.3164	0
Exp 2	5hmC	56.5458	0
Exp 2	5hmC	56.5458	0
Exp 2	5hmC	56.7752	0
Exp 2	5hmC	56.7752	0
Exp 2	5hmC	56.7752	0
Exp 2	5hmC	56.8899	0
Exp 2	5hmC	57.0046	0
Exp 2	5hmC	57.234	0
Exp 2	5hmC	57.3487	0
Exp 2	5hmC	57.3487	0
Exp 2	5hmC	57.6928	0.344092
Exp 2	5hmC	57.9222	0
Exp 2	5hmC	57.9222	0
Exp 2	5hmC	57.9222	0
Exp 2	5hmC	57.9222	0
Exp 2	5hmC	58.0369	0
Exp 2	5hmC	58.0369	0
Exp 2	5hmC	58.381	0
Exp 2	5hmC	58.381	0
Exp 2	5hmC	58.381	0
Exp 2	5hmC	58.381	0
Exp 2	5hmC	58.4957	0
Exp 2	5hmC	58.7251	1.83516
Exp 2	5hmC	58.7251	0
Exp 2	5hmC	58.8397	0
Exp 2	5hmC	59.0691	0
Exp 2	5hmC	59.1838	0
Exp 2	5hmC	59.2985	0
Exp 2	5hmC	59.4132	0
Exp 2	5hmC	59.5279	0
Exp 2	5hmC	59.6426	7.34063
Exp 2	5hmC	59.7573	0
Exp 2	5hmC	59.7573	0
Exp 2	5hmC	60.1014	0
Exp 2	5hmC	60.1014	0
Exp 2	5hmC	60.2161	1.60576
Exp 2	5hmC	60.3308	0
Exp 2	5hmC	60.4455	0
Exp 2	5hmC	60.6749	0
Exp 2	5hmC	60.9043	0
Exp 2	5hmC	60.9043	0
Exp 2	5hmC	61.019	0
Exp 2	5hmC	61.019	0
Exp 2	5hmC	61.1337	0
Exp 2	5hmC	61.1337	0
Exp 2	5hmC	61.2484	0
Exp 2	5hmC	61.3631	0
Exp 2	5hmC	61.5925	0
Exp 2	5hmC	61.7072	0
Exp 2	5hmC	61.7072	18.0075
Exp 2	5hmC	61.7072	0
Exp 2	5hmC	61.7072	1.37637
Exp 2	5hmC	61.8219	0.344092
Exp 2	5hmC	62.0513	0
Exp 2	5hmC	62.0513	2.98213
Exp 2	5hmC	62.166	0
Exp 2	5hmC	62.3954	0
Exp 2	5hmC	62.5101	13.1902
Exp 2	5hmC	62.7395	2.98213
Exp 2	5hmC	62.8542	0
Exp 2	5hmC	63.0836	0
Exp 2	5hmC	63.0836	0
Exp 2	5hmC	63.1983	0
Exp 2	5hmC	63.1983	16.4017
Exp 2	5hmC	63.4276	0
Exp 2	5hmC	63.657	0
Exp 2	5hmC	63.657	0
Exp 2	5hmC	63.7717	0
Exp 2	5hmC	63.8864	0
Exp 2	5hmC	64.1158	0
Exp 2	5hmC	64.1158	0
Exp 2	5hmC	64.1158	0
Exp 2	5hmC	64.1158	3.55562
Exp 2	5hmC	64.2305	47.8288
Exp 2	5hmC	64.2305	0
Exp 2	5hmC	64.2305	0
Exp 2	5hmC	64.4599	0
Exp 2	5hmC	64.804	0
Exp 2	5hmC	65.1481	0
Exp 2	5hmC	65.1481	0
Exp 2	5hmC	65.2628	0
Exp 2	5hmC	65.2628	0
Exp 2	5hmC	65.3775	0
Exp 2	5hmC	65.3775	0
Exp 2	5hmC	65.4922	0
Exp 2	5hmC	65.6069	0
Exp 2	5hmC	65.7216	0
Exp 2	5hmC	65.8363	0
Exp 2	5hmC	65.951	0
Exp 2	5hmC	65.951	0
Exp 2	5hmC	66.0657	31.7712
Exp 2	5hmC	66.0657	9.74928
Exp 2	5hmC	66.1804	0
Exp 2	5hmC	66.4098	0
Exp 2	5hmC	66.5245	0
Exp 2	5hmC	66.6392	0
Exp 2	5hmC	66.6392	1.26167
Exp 2	5hmC	66.6392	0
Exp 2	5hmC	67.098	0
Exp 2	5hmC	67.098	0
Exp 2	5hmC	67.2127	0
Exp 2	5hmC	67.3274	0
Exp 2	5hmC	67.3274	0
Exp 2	5hmC	67.4421	0
Exp 2	5hmC	67.6714	0
Exp 2	5hmC	67.6714	0
Exp 2	5hmC	67.6714	0
Exp 2	5hmC	67.7861	0
Exp 2	5hmC	67.9008	0
Exp 2	5hmC	67.9008	5.50547
Exp 2	5hmC	68.0155	0
Exp 2	5hmC	68.0155	0
Exp 2	5hmC	68.0155	0
Exp 2	5hmC	68.1302	0
Exp 2	5hmC	68.2449	0
Exp 2	5hmC	68.3596	0
Exp 2	5hmC	68.4743	0
Exp 2	5hmC	68.4743	0
Exp 2	5hmC	68.4743	0
Exp 2	5hmC	68.8184	0
Exp 2	5hmC	68.8184	0
Exp 2	5hmC	68.9331	0
Exp 2	5hmC	68.9331	0
Exp 2	5hmC	68.9331	0
Exp 2	5hmC	69.0478	0
Exp 2	5hmC	69.1625	0
Exp 2	5hmC	69.3919	0
Exp 2	5hmC	69.3919	0
Exp 2	5hmC	69.3919	0
Exp 2	5hmC	69.5066	0
Exp 2	5hmC	69.5066	0
Exp 2	5hmC	69.6213	0
Exp 2	5hmC	69.6213	0
Exp 2	5hmC	69.736	0
Exp 2	5hmC	69.736	0
Exp 2	5hmC	69.8507	0
Exp 2	5hmC	69.8507	0
Exp 2	5hmC	69.9654	0
Exp 2	5hmC	70.3095	0
Exp 2	5hmC	70.4242	0
Exp 2	5hmC	70.4242	0
Exp 2	5hmC	70.4242	0
Exp 2	5hmC	70.5389	0
Exp 2	5hmC	70.883	0
Exp 2	5hmC	70.9977	0
Exp 2	5hmC	70.9977	0
Exp 2	5hmC	70.9977	0
Exp 2	5hmC	71.2271	0
Exp 2	5hmC	71.3418	0
Exp 2	5hmC	71.4565	11.8138
Exp 2	5hmC	71.4565	0
Exp 2	5hmC	71.5712	4.2438
Exp 2	5hmC	71.8006	0
Exp 2	5hmC	71.8006	0
Exp 2	5hmC	72.0299	0
Exp 2	5hmC	72.1446	0
Exp 2	5hmC	72.2593	0
Exp 2	5hmC	72.374	19.3839
Exp 2	5hmC	72.374	0
Exp 2	5hmC	72.4887	0
Exp 2	5hmC	72.6034	0
Exp 2	5hmC	72.6034	0
Exp 2	5hmC	72.6034	0
Exp 2	5hmC	72.8328	0
Exp 2	5hmC	72.9475	0
Exp 2	5hmC	73.4063	0
Exp 2	5hmC	73.4063	0.802882
Exp 2	5hmC	73.7504	0
Exp 2	5hmC	73.9798	9.51988
Exp 2	5hmC	73.9798	0
Exp 2	5hmC	74.0945	0.917579
Exp 2	5hmC	74.0945	0
Exp 2	5hmC	74.2092	0
Exp 2	5hmC	74.2092	0
Exp 2	5hmC	74.2092	0
Exp 2	5hmC	74.2092	0
Exp 2	5hmC	74.2092	0
Exp 2	5hmC	74.3239	0
Exp 2	5hmC	74.668	0
Exp 2	5hmC	75.0121	0
Exp 2	5hmC	75.2415	0
Exp 2	5hmC	75.2415	2.06455
Exp 2	5hmC	75.3562	0
Exp 2	5hmC	75.4709	0
Exp 2	5hmC	75.4709	0
Exp 2	5hmC	75.5856	0
Exp 2	5hmC	75.7003	0
Exp 2	5hmC	75.7003	0
Exp 2	5hmC	75.815	0
Exp 2	5hmC	75.9297	0
Exp 2	5hmC	75.9297	0
Exp 2	5hmC	75.9297	0
Exp 2	5hmC	76.0444	0
Exp 2	5hmC	76.0444	0
Exp 2	5hmC	76.159	0
Exp 2	5hmC	76.2738	0
Exp 2	5hmC	76.2738	2.29395
Exp 2	5hmC	76.3885	0
Exp 2	5hmC	76.5031	0
Exp 2	5hmC	76.6178	0
Exp 2	5hmC	76.7325	0
Exp 2	5hmC	76.8472	0
Exp 2	5hmC	76.8472	1.37637
Exp 2	5hmC	76.9619	0
Exp 2	5hmC	77.0766	1.03228
Exp 2	5hmC	77.1913	0.114697
Exp 2	5hmC	77.1913	0
Exp 2	5hmC	77.5354	2.86743
Exp 2	5hmC	77.6501	0
Exp 2	5hmC	77.7648	0
Exp 2	5hmC	77.7648	0
Exp 2	5hmC	77.8795	0
Exp 2	5hmC	77.9942	0
Exp 2	5hmC	77.9942	0
Exp 2	5hmC	78.2236	0
Exp 2	5hmC	78.2236	0
Exp 2	5hmC	78.3383	0
Exp 2	5hmC	78.3383	0
Exp 2	5hmC	78.453	0
Exp 2	5hmC	78.453	0
Exp 2	5hmC	78.5677	0.688184
Exp 2	5hmC	78.5677	0
Exp 2	5hmC	78.6824	0
Exp 2	5hmC	78.7971	6.65245
Exp 2	5hmC	78.7971	0
Exp 2	5hmC	78.9118	0
Exp 2	5hmC	78.9118	0
Exp 2	5hmC	79.1412	0
Exp 2	5hmC	79.1412	0
Exp 2	5hmC	79.2559	0
Exp 2	5hmC	79.2559	0
Exp 2	5hmC	79.3706	0
Exp 2	5hmC	79.4853	0
Exp 2	5hmC	79.4853	0
Exp 2	5hmC	79.6	0
Exp 2	5hmC	79.7147	0
Exp 2	5hmC	80.0588	15.5988
Exp 2	5hmC	80.5176	0
Exp 2	5hmC	80.9763	0
Exp 2	5hmC	81.091	3.44092
Exp 2	5hmC	81.091	0
Exp 2	5hmC	81.2057	15.3694
Exp 2	5hmC	81.3204	63.657
Exp 2	5hmC	81.5498	0
Exp 2	5hmC	82.0086	0
Exp 2	5hmC	82.1233	0
Exp 2	5hmC	82.3527	0
Exp 2	5hmC	82.3527	18.4663
Exp 2	5hmC	82.5821	0
Exp 2	5hmC	82.5821	0
Exp 2	5hmC	82.6968	0
Exp 2	5hmC	82.6968	0
Exp 2	5hmC	82.6968	0
Exp 2	5hmC	82.8115	0
Exp 2	5hmC	82.8115	0
Exp 2	5hmC	83.0409	2.29395
Exp 2	5hmC	83.2703	13.8784
Exp 2	5hmC	83.385	0
Exp 2	5hmC	83.4997	0
Exp 2	5hmC	83.7291	0
Exp 2	5hmC	84.0732	0
Exp 2	5hmC	84.1879	0
Exp 2	5hmC	84.3026	0
Exp 2	5hmC	84.532	7.11124
Exp 2	5hmC	84.6467	0
Exp 2	5hmC	84.6467	0
Exp 2	5hmC	84.8761	0
Exp 2	5hmC	84.9908	0
Exp 2	5hmC	85.1054	0
Exp 2	5hmC	85.2201	0
Exp 2	5hmC	85.3348	0
Exp 2	5hmC	85.4495	0
Exp 2	5hmC	85.4495	0
Exp 2	5hmC	85.5642	9.74928
Exp 2	5hmC	85.5642	0
Exp 2	5hmC	85.7936	16.0576
Exp 2	5hmC	85.7936	12.1579
Exp 2	5hmC	86.023	0
Exp 2	5hmC	86.023	0
Exp 2	5hmC	86.1377	0
Exp 2	5hmC	86.2524	20.4161
Exp 2	5hmC	86.2524	0
Exp 2	5hmC	86.3671	0
Exp 2	5hmC	86.4818	0
Exp 2	5hmC	86.5965	0
Exp 2	5hmC	86.5965	0
Exp 2	5hmC	86.8259	0.458789
Exp 2	5hmC	86.9406	6.42305
Exp 2	5hmC	87.0553	0
Exp 2	5hmC	87.0553	1.14697
Exp 2	5hmC	87.17	0
Exp 2	5hmC	87.17	0
Exp 2	5hmC	87.17	0
Exp 2	5hmC	87.17	9.74928
Exp 2	5hmC	87.17	0
Exp 2	5hmC	87.2847	0
Exp 2	5hmC	87.3994	0.688184
Exp 2	5hmC	87.3994	0
Exp 2	5hmC	87.3994	3.67032
Exp 2	5hmC	87.6288	0.114697
Exp 2	5hmC	87.7435	0
Exp 2	5hmC	87.9729	0
Exp 2	5hmC	87.9729	0
Exp 2	5hmC	88.2023	0
Exp 2	5hmC	88.317	22.5954
Exp 2	5hmC	88.317	0
Exp 2	5hmC	88.5464	0
Exp 2	5hmC	88.6611	0
Exp 2	5hmC	88.7758	0
Exp 2	5hmC	89.0052	1.60576
Exp 2	5hmC	89.0052	0
Exp 2	5hmC	89.1199	0
Exp 2	5hmC	89.3493	0
Exp 2	5hmC	89.464	0
Exp 2	5hmC	89.5786	0
Exp 2	5hmC	89.6933	0
Exp 2	5hmC	89.6933	1.14697
Exp 2	5hmC	89.9227	2.17925
Exp 2	5hmC	90.0374	0.802882
Exp 2	5hmC	90.1521	0
Exp 2	5hmC	90.1521	0
Exp 2	5hmC	90.2668	0
Exp 2	5hmC	90.2668	0
Exp 2	5hmC	90.2668	8.14351
Exp 2	5hmC	90.4962	0
Exp 2	5hmC	90.4962	0
Exp 2	5hmC	90.7256	0
Exp 2	5hmC	90.8403	4.81729
Exp 2	5hmC	91.0697	4.2438
Exp 2	5hmC	91.2991	0
Exp 2	5hmC	91.2991	0
Exp 2	5hmC	91.4138	0
Exp 2	5hmC	91.4138	0
Exp 2	5hmC	91.5285	0
Exp 2	5hmC	91.5285	0
Exp 2	5hmC	91.6432	0
Exp 2	5hmC	91.8726	0
Exp 2	5hmC	91.9873	0
Exp 2	5hmC	92.102	0
Exp 2	5hmC	92.4461	0
Exp 2	5hmC	92.4461	0
Exp 2	5hmC	92.5608	0
Exp 2	5hmC	92.6755	0
Exp 2	5hmC	92.6755	0
Exp 2	5hmC	92.7902	3.67032
Exp 2	5hmC	92.9049	0
Exp 2	5hmC	93.0196	0
Exp 2	5hmC	93.1343	4.3585
Exp 2	5hmC	93.249	0
Exp 2	5hmC	93.3637	0
Exp 2	5hmC	93.3637	0
Exp 2	5hmC	93.4784	1.72046
Exp 2	5hmC	93.5931	0
Exp 2	5hmC	93.5931	0
Exp 2	5hmC	93.7077	0
Exp 2	5hmC	93.7077	9.51988
Exp 2	5hmC	94.0518	10.3228
Exp 2	5hmC	94.0518	0
Exp 2	5hmC	94.0518	0
Exp 2	5hmC	94.2812	7.91412
Exp 2	5hmC	94.3959	0
Exp 2	5hmC	94.6253	4.3585
Exp 2	5hmC	94.74	0.458789
Exp 2	5hmC	94.74	0
Exp 2	5hmC	94.8547	0
Exp 2	5hmC	94.8547	0
Exp 2	5hmC	94.8547	0
Exp 2	5hmC	94.9694	0
Exp 2	5hmC	94.9694	0
Exp 2	5hmC	95.0841	0
Exp 2	5hmC	95.0841	37.9648
Exp 2	5hmC	95.0841	0
Exp 2	5hmC	95.0841	0
Exp 2	5hmC	95.3135	0
Exp 2	5hmC	95.887	0
Exp 2	5hmC	95.887	0
Exp 2	5hmC	96.4605	0
Exp 2	5hmC	96.4605	0
Exp 2	5hmC	96.5752	6.65245
Exp 2	5hmC	96.6899	0
Exp 2	5hmC	96.8046	0
Exp 2	5hmC	96.8046	0
Exp 2	5hmC	96.9193	0
Exp 2	5hmC	96.9193	0
Exp 2	5hmC	96.9193	0.229395
Exp 2	5hmC	96.9193	0
Exp 2	5hmC	97.1487	0
Exp 2	5hmC	97.1487	0
Exp 2	5hmC	97.1487	0
Exp 2	5hmC	97.2634	0.114697
Exp 2	5hmC	97.2634	0
Exp 2	5hmC	97.2634	0
Exp 2	5hmC	97.3781	6.99654
Exp 2	5hmC	97.4928	0
Exp 2	5hmC	97.4928	0
Exp 2	5hmC	97.4928	0
Exp 2	5hmC	97.6075	0
Exp 2	5hmC	97.7222	0
Exp 2	5hmC	97.8369	0
Exp 2	5hmC	97.8369	0
Exp 2	5hmC	97.9516	0
Exp 2	5hmC	98.0663	0
Exp 2	5hmC	98.0663	0
Exp 2	5hmC	98.1809	0
Exp 2	5hmC	98.1809	0
Exp 2	5hmC	98.525	0
Exp 2	5hmC	98.6397	0
Exp 2	5hmC	98.9838	0
Exp 2	5hmC	98.9838	0
Exp 2	5hmC	99.0985	0
Exp 2	5hmC	99.3279	0
Exp 2	5hmC	99.4426	0
Exp 2	5hmC	99.5573	0
Exp 2	5hmC	99.5573	0
Exp 2	5hmC	99.5573	0
Exp 2	5hmC	99.672	0
Exp 2	5hmC	99.7867	0
Exp 2	5hmC	99.9014	2.40864
Exp 2	5hmC	99.9014	0
Exp 2	5hmC	100.016	23.6277
Exp 2	5hmC	100.131	0
Exp 2	5hmC	100.131	0
Exp 2	5hmC	100.245	1.37637
Exp 2	5hmC	100.36	0
Exp 2	5hmC	100.36	4.3585
Exp 2	5hmC	100.704	1.94985
Exp 2	5hmC	100.704	0
Exp 2	5hmC	100.704	1.83516
Exp 2	5hmC	100.704	0
Exp 2	5hmC	100.819	0.917579
Exp 2	5hmC	101.392	0
Exp 2	5hmC	101.622	0
Exp 2	5hmC	101.737	0
Exp 2	5hmC	101.966	2.52334
Exp 2	5hmC	102.081	0
Exp 2	5hmC	102.081	0
Exp 2	5hmC	102.425	0
Exp 2	5hmC	102.539	0
Exp 2	5hmC	102.654	0.114697
Exp 2	5hmC	102.769	0
Exp 2	5hmC	102.884	0
Exp 2	5hmC	103.228	0
Exp 2	5hmC	103.342	0
Exp 2	5hmC	103.342	1.60576
Exp 2	5hmC	103.342	0
Exp 2	5hmC	103.572	0
Exp 2	5hmC	103.572	12.1579
Exp 2	5hmC	103.686	0
Exp 2	5hmC	103.686	0
Exp 2	5hmC	103.801	0
Exp 2	5hmC	103.801	0
Exp 2	5hmC	103.916	0
Exp 2	5hmC	104.26	0
Exp 2	5hmC	104.375	0
Exp 2	5hmC	104.375	0
Exp 2	5hmC	104.375	0
Exp 2	5hmC	104.375	0
Exp 2	5hmC	104.489	0
Exp 2	5hmC	104.604	0
Exp 2	5hmC	104.604	0
Exp 2	5hmC	104.719	0
Exp 2	5hmC	104.833	12.3873
Exp 2	5hmC	104.948	0
Exp 2	5hmC	104.948	5.96426
Exp 2	5hmC	105.063	8.02882
Exp 2	5hmC	105.177	0
Exp 2	5hmC	105.292	0
Exp 2	5hmC	105.292	0
Exp 2	5hmC	105.407	0
Exp 2	5hmC	105.522	11.8138
Exp 2	5hmC	105.522	0
Exp 2	5hmC	105.636	0.229395
Exp 2	5hmC	105.751	4.4732
Exp 2	5hmC	105.866	0
Exp 2	5hmC	105.866	20.8749
Exp 2	5hmC	105.866	0
Exp 2	5hmC	105.866	0.458789
Exp 2	5hmC	105.98	3.78501
Exp 2	5hmC	106.439	0
Exp 2	5hmC	106.554	0
Exp 2	5hmC	106.669	0
Exp 2	5hmC	106.783	0
Exp 2	5hmC	106.898	0
Exp 2	5hmC	107.013	0.114697
Exp 2	5hmC	107.242	27.7568
Exp 2	5hmC	107.357	0
Exp 2	5hmC	107.586	0
Exp 2	5hmC	107.93	0
Exp 2	5hmC	107.93	0
Exp 2	5hmC	108.045	0
Exp 2	5hmC	108.733	0
Exp 2	5hmC	108.848	0
Exp 2	5hmC	108.848	0
Exp 2	5hmC	108.848	0
Exp 2	5hmC	109.307	0
Exp 2	5hmC	109.307	1.72046
Exp 2	5hmC	109.421	0
Exp 2	5hmC	109.421	0
Exp 2	5hmC	109.536	0
Exp 2	5hmC	109.536	0
Exp 2	5hmC	109.536	13.649
Exp 2	5hmC	109.765	0
Exp 2	5hmC	109.995	2.17925
Exp 2	5hmC	110.109	0.114697
Exp 2	5hmC	110.224	0
Exp 2	5hmC	110.339	0
Exp 2	5hmC	110.339	0
Exp 2	5hmC	110.683	0
Exp 2	5hmC	110.683	0
Exp 2	5hmC	110.912	0
Exp 2	5hmC	111.601	39.4559
Exp 2	5hmC	111.945	0
Exp 2	5hmC	112.174	11.0109
Exp 2	5hmC	112.174	0
Exp 2	5hmC	112.174	0
Exp 2	5hmC	112.174	0
Exp 2	5hmC	112.174	6.65245
Exp 2	5hmC	112.289	0
Exp 2	5hmC	112.403	0
Exp 2	5hmC	112.633	10.2081
Exp 2	5hmC	112.748	0
Exp 2	5hmC	112.977	0
Exp 2	5hmC	112.977	0
Exp 2	5hmC	113.092	0
Exp 2	5hmC	113.206	0
Exp 2	5hmC	113.321	0
Exp 2	5hmC	113.321	0
Exp 2	5hmC	113.436	0.917579
Exp 2	5hmC	113.665	0
Exp 2	5hmC	113.78	5.84957
Exp 2	5hmC	113.894	0
Exp 2	5hmC	114.124	0
Exp 2	5hmC	114.124	0
Exp 2	5hmC	114.124	0
Exp 2	5hmC	114.468	0
Exp 2	5hmC	114.468	0
Exp 2	5hmC	114.583	0
Exp 2	5hmC	114.697	0
Exp 2	5hmC	114.812	0
Exp 2	5hmC	114.812	29.5919
Exp 2	5hmC	115.041	0.458789
Exp 2	5hmC	115.041	2.17925
Exp 2	5hmC	115.271	8.8317
Exp 2	5hmC	115.386	0
Exp 2	5hmC	115.386	8.37291
Exp 2	5hmC	115.615	0
Exp 2	5hmC	115.73	0
Exp 2	5hmC	115.844	19.3839
Exp 2	5hmC	115.959	0
Exp 2	5hmC	115.959	0
Exp 2	5hmC	116.533	0
Exp 2	5hmC	116.647	0
Exp 2	5hmC	116.877	0
Exp 2	5hmC	117.106	0
Exp 2	5hmC	117.106	0
Exp 2	5hmC	117.335	0
Exp 2	5hmC	117.45	4.01441
Exp 2	5hmC	117.794	0
Exp 2	5hmC	117.794	0
Exp 2	5hmC	117.909	0
Exp 2	5hmC	118.253	0
Exp 2	5hmC	118.482	7.57003
Exp 2	5hmC	118.597	0
Exp 2	5hmC	118.712	0
Exp 2	5hmC	119.4	2.17925
Exp 2	5hmC	119.629	0
Exp 2	5hmC	119.744	0
Exp 2	5hmC	119.744	0
Exp 2	5hmC	119.973	8.14351
Exp 2	5hmC	120.547	0
Exp 2	5hmC	120.547	11.1256
Exp 2	5hmC	120.547	0
Exp 2	5hmC	120.547	0
Exp 2	5hmC	120.776	0
Exp 2	5hmC	121.006	0
Exp 2	5hmC	121.12	0
Exp 2	5hmC	121.465	0
Exp 2	5hmC	121.579	0
Exp 2	5hmC	121.809	0
Exp 2	5hmC	121.923	0
Exp 2	5hmC	122.497	2.06455
Exp 2	5hmC	122.611	0.573487
Exp 2	5hmC	123.07	0
Exp 2	5hmC	123.185	0
Exp 2	5hmC	123.3	0
Exp 2	5hmC	123.529	0
Exp 2	5hmC	123.529	0
Exp 2	5hmC	123.644	7.68472
Exp 2	5hmC	123.873	0
Exp 2	5hmC	124.103	0
Exp 2	5hmC	124.103	0
Exp 2	5hmC	124.447	0
Exp 2	5hmC	124.791	2.40864
Exp 2	5hmC	124.905	0
Exp 2	5hmC	125.02	0
Exp 2	5hmC	125.938	39.4559
Exp 2	5hmC	126.052	0
Exp 2	5hmC	126.282	5.27608
Exp 2	5hmC	126.397	0
Exp 2	5hmC	126.397	0
Exp 2	5hmC	126.741	0
Exp 2	5hmC	127.543	0
Exp 2	5hmC	127.888	8.37291
Exp 2	5hmC	128.117	0
Exp 2	5hmC	128.346	8.6023
Exp 2	5hmC	128.461	0
Exp 2	5hmC	128.461	0.802882
Exp 2	5hmC	128.69	0
Exp 2	5hmC	128.805	0
Exp 2	5hmC	128.805	0
Exp 2	5hmC	129.149	0
Exp 2	5hmC	129.264	0
Exp 2	5hmC	129.493	0
Exp 2	5hmC	129.608	9.51988
Exp 2	5hmC	130.296	2.52334
Exp 2	5hmC	130.64	0
Exp 2	5hmC	130.984	0.114697
Exp 2	5hmC	131.099	6.30835
Exp 2	5hmC	131.328	0
Exp 2	5hmC	132.705	0
Exp 2	5hmC	132.705	8.37291
Exp 2	5hmC	133.049	0
Exp 2	5hmC	133.049	0
Exp 2	5hmC	133.164	8.25821
Exp 2	5hmC	133.508	28.4449
Exp 2	5hmC	133.737	0
Exp 2	5hmC	133.737	0
Exp 2	5hmC	133.737	0
Exp 2	5hmC	133.852	0
Exp 2	5hmC	134.425	0
Exp 2	5hmC	134.54	0
Exp 2	5hmC	134.54	0
Exp 2	5hmC	134.999	8.02882
Exp 2	5hmC	135.802	11.5844
Exp 2	5hmC	136.031	0
Exp 2	5hmC	136.146	0
Exp 2	5hmC	136.26	0
Exp 2	5hmC	136.49	0
Exp 2	5hmC	136.834	0
Exp 2	5hmC	136.834	0
Exp 2	5hmC	137.407	0
Exp 2	5hmC	137.752	0
Exp 2	5hmC	138.554	6.76715
Exp 2	5hmC	138.899	0
Exp 2	5hmC	139.013	0
Exp 2	5hmC	139.013	0.114697
Exp 2	5hmC	139.243	0
Exp 2	5hmC	139.243	0
Exp 2	5hmC	139.587	0
Exp 2	5hmC	140.504	0
Exp 2	5hmC	140.619	0
Exp 2	5hmC	141.307	0
Exp 2	5hmC	142.11	0
Exp 2	5hmC	142.798	14.1078
Exp 2	5hmC	142.913	1.72046
Exp 2	5hmC	143.831	0
Exp 2	5hmC	144.175	2.86743
Exp 2	5hmC	144.289	5.04668
Exp 2	5hmC	144.633	0
Exp 2	5hmC	144.977	0
Exp 2	5hmC	145.322	0
Exp 2	5hmC	145.322	42.8968
Exp 2	5hmC	145.436	0
Exp 2	5hmC	145.436	2.17925
Exp 2	5hmC	145.551	7.57003
Exp 2	5hmC	145.666	0
Exp 2	5hmC	146.124	10.2081
Exp 2	5hmC	146.698	9.74928
Exp 2	5hmC	147.042	0
Exp 2	5hmC	148.533	0
Exp 2	5hmC	148.992	0
Exp 2	5hmC	149.221	7.57003
Exp 2	5hmC	149.221	0
Exp 2	5hmC	150.139	0.114697
Exp 2	5hmC	150.254	2.98213
Exp 2	5hmC	150.483	1.72046
Exp 2	5hmC	150.712	52.4167
Exp 2	5hmC	150.942	0
Exp 2	5hmC	151.056	3.55562
Exp 2	5hmC	151.056	14.9107
Exp 2	5hmC	151.171	0
Exp 2	5hmC	151.401	3.55562
Exp 2	5hmC	153.006	20.8749
Exp 2	5hmC	153.236	14.9107
Exp 2	5hmC	153.809	0
Exp 2	5hmC	153.809	0
Exp 2	5hmC	153.924	0
Exp 2	5hmC	154.612	0
Exp 2	5hmC	154.841	20.8749
Exp 2	5hmC	155.3	0
Exp 2	5hmC	155.415	0
Exp 2	5hmC	156.218	0
Exp 2	5hmC	156.218	6.65245
Exp 2	5hmC	156.791	0
Exp 2	5hmC	157.365	0
Exp 2	5hmC	157.709	0
Exp 2	5hmC	158.053	0
Exp 2	5hmC	158.282	0
Exp 2	5hmC	158.626	14.4519
Exp 2	5hmC	158.741	0.114697
Exp 2	5hmC	159.888	0.917579
Exp 2	5hmC	160.92	0
Exp 2	5hmC	160.92	0
Exp 2	5hmC	161.15	0
Exp 2	5hmC	161.609	12.502
Exp 2	5hmC	162.182	31.6565
Exp 2	5hmC	162.297	0.114697
Exp 2	5hmC	162.297	0
Exp 2	5hmC	162.411	0
Exp 2	5hmC	162.411	20.072
Exp 2	5hmC	162.87	15.8282
Exp 2	5hmC	163.1	12.9608
Exp 2	5hmC	163.329	0
Exp 2	5hmC	165.852	1.26167
Exp 2	5hmC	165.967	9.51988
Exp 2	5hmC	166.082	12.6167
Exp 2	5hmC	166.082	4.2438
Exp 2	5hmC	166.196	0
Exp 2	5hmC	166.311	0.344092
Exp 2	5hmC	167.229	0
Exp 2	5hmC	167.688	0
Exp 2	5hmC	169.179	0
Exp 2	5hmC	169.408	0
Exp 2	5hmC	170.326	14.2225
Exp 2	5hmC	170.44	13.1902
Exp 2	5hmC	170.784	0
Exp 2	5hmC	171.243	11.5844
Exp 2	5hmC	171.587	8.717
Exp 2	5hmC	171.817	0
Exp 2	5hmC	173.537	0
Exp 2	5hmC	173.767	18.3516
Exp 2	5hmC	173.996	4.58789
Exp 2	5hmC	174.455	0
Exp 2	5hmC	175.831	0
Exp 2	5hmC	176.06	0
Exp 2	5hmC	177.322	0
Exp 2	5hmC	177.896	12.1579
Exp 2	5hmC	179.043	0
Exp 2	5hmC	179.272	0
Exp 2	5hmC	179.616	2.40864
Exp 2	5hmC	180.19	19.1545
Exp 2	5hmC	180.304	22.366
Exp 2	5hmC	182.484	0.917579
Exp 2	5hmC	184.089	0
Exp 2	5hmC	187.645	8.25821
Exp 2	5hmC	188.218	0
Exp 2	5hmC	188.333	37.9648
Exp 2	5hmC	189.136	0
Exp 2	5hmC	189.709	0.458789
Exp 2	5hmC	189.824	18.1222
Exp 2	5hmC	190.398	0
Exp 2	5hmC	193.609	0
Exp 2	5hmC	197.05	0
Exp 2	5hmC	197.853	0
Exp 2	5hmC	198.426	0
Exp 2	5hmC	198.656	0
Exp 2	5hmC	198.885	0
Exp 2	5hmC	200.491	0
Exp 2	5hmC	209.552	0.114697
Exp 2	5hmC	209.781	0
Exp 2	5hmC	212.993	5.16138
Exp 2	5hmC	214.025	0
Exp 2	5hmC	214.025	2.63804
Exp 2	5hmC	218.154	0
Exp 2	5hmC	220.563	0
Exp 2	5hmC	220.907	0
Exp 2	5hmC	221.595	0
Exp 2	5hmC	221.595	0
Exp 2	5hmC	225.38	0
Exp 2	5hmC	225.724	0
Exp 2	5hmC	229.165	0.458789
Exp 2	5hmC	233.639	0
Exp 2	5hmC	234.212	0
Exp 2	5hmC	235.932	5.62017
Exp 2	5hmC	239.603	0
Exp 2	5hmC	241.553	6.65245
Exp 2	5hmC	241.897	4.01441
Exp 2	5hmC	243.273	0
Exp 2	5hmC	243.503	1.26167
Exp 2	5hmC	243.732	0
Exp 2	5hmC	246.141	0
Exp 2	5hmC	246.714	0
Exp 2	5hmC	250.614	0
Exp 2	5hmC	251.302	3.67032
Exp 2	5hmC	251.875	19.2692
Exp 2	5hmC	252.22	9.17579
Exp 2	5hmC	254.399	0
Exp 2	5hmC	264.492	0
Exp 2	5hmC	267.474	25.8069
Exp 2	5hmC	268.621	0
Exp 2	5hmC	275.503	0
Exp 2	5hmC	275.732	0
Exp 2	5hmC	277.797	0
Exp 2	5hmC	279.747	0
Exp 2	5hmC	286.285	3.09683
Exp 2	5hmC	290.414	0.229395
Exp 2	5hmC	290.873	0
Exp 2	5hmC	298.328	3.32622
Exp 2	5hmC	299.475	0
Exp 2	5hmC	301.081	0
Exp 2	5hmC	305.324	8.02882
Exp 2	5hmC	309.912	0
Exp 2	5hmC	310.256	11.355
Exp 2	5hmC	317.482	0
Exp 2	5hmC	317.826	0
Exp 2	5hmC	323.791	20.5308
Exp 2	5hmC	325.052	5.16138
Exp 2	5hmC	325.626	8.48761
Exp 2	5hmC	327.69	6.99654
Exp 2	5hmC	328.379	27.0686
Exp 2	5hmC	328.952	0
Exp 2	5hmC	342.486	0
Exp 2	5hmC	351.318	26.4951
Exp 2	5hmC	357.856	0.114697
Exp 2	5hmC	362.1	0
Exp 2	5hmC	365.426	22.7101
Exp 2	5hmC	380.222	55.0547
Exp 2	5hmC	386.301	20.3014
Exp 2	5hmC	386.415	90.955
Exp 2	5hmC	392.38	0
Exp 2	5hmC	400.982	0
Exp 2	5hmC	403.964	0
Exp 2	5hmC	404.194	0
Exp 2	5hmC	412.566	0
Exp 2	5hmC	416.122	24.6599
Exp 2	5hmC	423.119	0.458789
Exp 2	5hmC	444.682	22.366
Exp 2	5hmC	446.287	0
Exp 2	5hmC	457.413	16.5164
Exp 2	5hmC	468.768	2.17925
Exp 2	5hmC	474.503	0
Exp 2	5hmC	475.421	0
Exp 2	5hmC	489.184	2.98213
Exp 2	5hmC	491.134	0.114697
Exp 2	5hmC	492.396	5.39078
Exp 2	5hmC	492.74	0
Exp 2	5hmC	495.034	0
Exp 2	5hmC	502.604	3.67032
Exp 2	5hmC	505.815	34.2945
Exp 2	5hmC	506.733	26.7245
Exp 2	5hmC	507.536	0.229395
Exp 2	5hmC	511.78	0.802882
Exp 2	5hmC	512.697	11.8138
Exp 2	5hmC	516.138	3.55562
Exp 2	5hmC	519.235	0
Exp 2	5hmC	521.3	0
Exp 2	5hmC	522.561	16.1723
Exp 2	5hmC	522.905	1.26167
Exp 2	5hmC	524.855	0
Exp 2	5hmC	527.264	1.37637
Exp 2	5hmC	530.131	23.8571
Exp 2	5hmC	532.081	68.3596
Exp 2	5hmC	541.257	27.8715
Exp 2	5hmC	543.78	10.6669
Exp 2	5hmC	554.906	0
Exp 2	5hmC	558.691	0.229395
Exp 2	5hmC	565.917	0
Exp 2	5hmC	577.731	0
Exp 2	5hmC	578.304	14.1078
Exp 2	5hmC	580.254	50.2374
Exp 2	5hmC	607.552	98.9838
Exp 2	5hmC	631.753	36.5885
Exp 2	5hmC	635.653	18.1222
Exp 2	5hmC	642.879	5.39078
Exp 2	5hmC	643.682	0
Exp 2	5hmC	657.216	0
Exp 2	5hmC	658.707	87.8582
Exp 2	5hmC	667.653	0
Exp 2	5hmC	667.883	9.51988
Exp 2	5hmC	672.241	33.1475
Exp 2	5hmC	678.55	4.2438
Exp 2	5hmC	693.575	6.76715
Exp 2	5hmC	694.607	1.83516
Exp 2	5hmC	696.328	0.458789
Exp 2	5hmC	700.457	6.19366
Exp 2	5hmC	710.321	2.63804
Exp 2	5hmC	719.382	3.32622
Exp 2	5hmC	729.131	0
Exp 2	5hmC	740.945	0
Exp 2	5hmC	743.354	0
Exp 2	5hmC	745.648	0
Exp 2	5hmC	758.15	4.81729
Exp 2	5hmC	758.379	18.581
Exp 2	5hmC	763.54	0
Exp 2	5hmC	775.125	66.0657
Exp 2	5hmC	775.24	71.1124
Exp 2	5hmC	781.892	41.4057
Exp 2	5hmC	788.659	0
Exp 2	5hmC	813.09	51.0403
Exp 2	5hmC	813.548	1.37637
Exp 2	5hmC	816.645	4.4732
Exp 2	5hmC	834.079	0
Exp 2	5hmC	835.456	0
Exp 2	5hmC	837.635	14.6813
Exp 2	5hmC	837.979	2.86743
Exp 2	5hmC	850.71	0.114697
Exp 2	5hmC	858.51	18.4663
Exp 2	5hmC	861.263	0
Exp 2	5hmC	862.754	2.63804
Exp 2	5hmC	869.635	0
Exp 2	5hmC	902.324	23.8571
Exp 2	5hmC	906.568	0
Exp 2	5hmC	918.382	11.1256
Exp 2	5hmC	925.722	0
Exp 2	5hmC	933.866	50.4668
Exp 2	5hmC	936.275	0
Exp 2	5hmC	947.4	30.1654
Exp 2	5hmC	948.777	163.214
Exp 2	5hmC	956.003	0
Exp 2	5hmC	965.867	40.2588
Exp 2	5hmC	975.272	0
Exp 2	5hmC	976.189	15.1401
Exp 2	5hmC	982.842	27.298
Exp 2	5hmC	987.43	0
Exp 2	5hmC	991.673	3.44092
Exp 2	5hmC	995.917	33.4916
Exp 2	5hmC	1000.28	0.573487
Exp 2	5hmC	1022.76	0
Exp 2	5hmC	1027.11	47.1406
Exp 2	5hmC	1046.15	0
Exp 2	5hmC	1050.51	10.2081
Exp 2	5hmC	1056.13	2.06455
Exp 2	5hmC	1059.23	1.26167
Exp 2	5hmC	1068.52	2.29395
Exp 2	5hmC	1075.29	61.2484
Exp 2	5hmC	1076.43	22.7101
Exp 2	5hmC	1079.42	0
Exp 2	5hmC	1085.27	84.532
Exp 2	5hmC	1090.77	0
Exp 2	5hmC	1090.89	0
Exp 2	5hmC	1099.95	0
Exp 2	5hmC	1106.6	0
Exp 2	5hmC	1109.12	0
Exp 2	5hmC	1117.73	0
Exp 2	5hmC	1185.51	16.5164
Exp 2	5hmC	1185.74	0
Exp 2	5hmC	1188.49	35.6709
Exp 2	5hmC	1190.79	69.1625
Exp 2	5hmC	1195.26	0
Exp 2	5hmC	1202.72	0
Exp 2	5hmC	1204.78	2.17925
Exp 2	5hmC	1208.34	0
Exp 2	5hmC	1212.47	34.2945
Exp 2	5hmC	1227.26	15.3694
Exp 2	5hmC	1238.39	99.672
Exp 2	5hmC	1242.06	0
Exp 2	5hmC	1255.25	43.4703
Exp 2	5hmC	1257.08	10.0934
Exp 2	5hmC	1257.31	0
Exp 2	5hmC	1277.5	0
Exp 2	5hmC	1278.3	12.8461
Exp 2	5hmC	1308.58	0
Exp 2	5hmC	1311.11	5.62017
Exp 2	5hmC	1314.32	0.114697
Exp 2	5hmC	1315.46	121.694
Exp 2	5hmC	1328.2	13.3049
Exp 2	5hmC	1332.67	0
Exp 2	5hmC	1338.86	13.1902
Exp 2	5hmC	1350.1	0
Exp 2	5hmC	1352.97	11.0109
Exp 2	5hmC	1359.39	26.7245
Exp 2	5hmC	1365.59	53.1049
Exp 2	5hmC	1379.69	23.8571
Exp 2	5hmC	1385.43	7.68472
Exp 2	5hmC	1397.82	121.006
Exp 2	5hmC	1408.71	0
Exp 2	5hmC	1413.19	5.50547
Exp 2	5hmC	1426.61	1.26167
Exp 2	5hmC	1453.45	0
Exp 2	5hmC	1472.83	64.3452
Exp 2	5hmC	1475.81	7.34063
Exp 2	5hmC	1476.96	0
Exp 2	5hmC	1479.25	2.06455
Exp 2	5hmC	1483.5	179.845
Exp 2	5hmC	1513.32	0
Exp 2	5hmC	1516.3	22.8248
Exp 2	5hmC	1542.11	20.1867
Exp 2	5hmC	1544.06	42.7821
Exp 2	5hmC	1548.07	2.75274
Exp 2	5hmC	1551.51	7.11124
Exp 2	5hmC	1558.51	0
Exp 2	5hmC	1560.8	18.1222
Exp 2	5hmC	1569.29	0
Exp 2	5hmC	1576.4	25.1187
Exp 2	5hmC	1576.4	0
Exp 2	5hmC	1595.44	0
Exp 2	5hmC	1600.14	4.70259
Exp 2	5hmC	1641.89	5.62017
Exp 2	5hmC	1653.59	37.2766
Exp 2	5hmC	1654.74	101.966
Exp 2	5hmC	1656.92	29.0184
Exp 2	5hmC	1692.93	0
Exp 2	5hmC	1701.31	22.7101
Exp 2	5hmC	1706.35	1.49107
Exp 2	5hmC	1736.4	29.0184
Exp 2	5hmC	1746.5	25.4628
Exp 2	5hmC	1754.87	3.67032
Exp 2	5hmC	1784.69	8.8317
Exp 2	5hmC	1796.62	54.3666
Exp 2	5hmC	1814.74	19.9573
Exp 2	5hmC	1820.13	1.14697
Exp 2	5hmC	1835.04	0
Exp 2	5hmC	1861.42	0
Exp 2	5hmC	1868.42	63.4276
Exp 2	5hmC	1875.88	0.344092
Exp 2	5hmC	1884.02	29.0184
Exp 2	5hmC	1899.39	157.135
Exp 2	5hmC	1908.79	1.14697
Exp 2	5hmC	1908.79	63.1983
Exp 2	5hmC	1932.08	0
Exp 2	5hmC	1941.14	0
Exp 2	5hmC	1961.1	4.01441
Exp 2	5hmC	1976.58	4.81729
Exp 2	5hmC	1980.48	49.4346
Exp 2	5hmC	1986.21	59.0691
Exp 2	5hmC	1992.29	94.5106
Exp 2	5hmC	2054	0.114697
[truncated: 2,503 more rows]
