# Supplementary material for: A drug repurposing approach reveals targetable epigenetic pathways in Plasmodium vivax hypnozoites
Source: eLife. 2025 Sep 30;13:RP98221. doi: 10.7554/eLife.98221 (PMC12483515; doi:10.7554/eLife.98221)
Supplement: Figure 5—source data 1. [file elife-98221-fig5-data1.xlsx]

## Sheet: Figure5Supplement2-PvLSv3-IPC
Table of individual P. vivax liver stage runs using the 12-day assay with 1-aminobenzotriazole for Figure 5-figure supplement 2. Yellow: inactivity of Monensin control likely due to solubility issues during source plate preparation. Red line indicates nigericin or monensin control.Bars represent SD of replicate wells.
Molecule Name	Synonyms	Batch Ref #	Run Date	Radical Cure Schizont Net Growth Area EC50 (μM)	Radical Cure Schizont Net Growth Area Maximum Inhibtion (%)	Radical Cure Schizont Net Growth Area Plot	Radical Cure Hypnozoite Quantity EC50 (μM)	Radical Cure Hypnozoite Quantity Maximum Inhibition (%)	Radical Cure Hypnozoite Quantity Plot	Radical Cure Toxicity CC50 (μM)	Radical Cure Toxicity Maximum Inhibtion (%)	Radical Cure Toxicity Plot	Primary Human Hepatocyte Lot	P. vivax Case	Screen Location
UGA-0031542	Cadralazine	RFM-008-828-8	2019-08-19	ND	81.5		1.07	83		> 10.0	9.42		BGW	Pv893	IPC
UGA-0031542	Cadralazine	B2417	2020-02-23	0.158	100		0.067	92.8		> 50.0	19.4		BGW	Pv893	IPC
UGA-0031542	Cadralazine	B2417	2020-02-25	0.507	88.9		0.641	86		> 50.0	23.3		BGW	2020-005	SMRU
UGA-0031542	Cadralazine	B2417	2020-01-11	0.247	90.8		0.524	92.6		> 50.0	6.79		BGW	Pv951	IPC
UGA-0031542	Cadralazine	B2417	2020-01-12	0.703	92.5		0.596	78.6		> 50.0	5.19		BGW	Pv952	IPC
UGA-0031542	Cadralazine	B2417	2020-02-17	0.133	91		0.171	97.1		> 50.0	6.58		BGW	Pv959	IPC
UGA-0000195	Budralazine	RFM-006-499-3	2019-08-19	> 10.0	52.5		> 10.0	38.2		> 10.0	10.3		BGW	Pv893	IPC
UGA-0000247	KDU691	CBR-001-210-496-0	2019-08-19	0.284	89.3		> 3.00	34.8		> 3.00	-1.27		BGW	Pv893	IPC
UGA-0002106	Monensin	CBR-001-547-426-7	2019-08-19	0.623	89.2		4.84	51.8		> 5.00	-0.922		BGW	Pv893	IPC
UGA-0002590	Nigericin	CBR-001-844-586-8	2019-08-19	0.00123	95.2		0.00354	98.2		> 0.100	9.96		BGW	Pv893	IPC
UGA-0002590	Nigericin	MMV638472-03	2020-02-23	ND	97.2		0.0085	96.4		> 0.200	15.7		BGW	Pv893	IPC
UGA-0002590	Nigericin	MMV638472-03	2020-02-25	0.0165	96.2		0.00775	100		> 0.200	21.8		BGW	Pv893	IPC
UGA-0002590	Nigericin	MMV638472-03	2020-01-11	0.0037	95.8		0.0113	99.8		> 0.200	19		BGW	Pv893	IPC
UGA-0002590	Nigericin	MMV638472-03	2020-01-12	0.0173	98.7		0.0174	97.8		> 0.200	7.53		BGW	Pv893	IPC
UGA-0002590	Nigericin	MMV638472-03	2020-02-17	0.0485	98.2		0.0347	98.8		> 0.200	13.7		BGW	Pv893	IPC
UGA-0004210	Poziotinib	RFM-003-056-8	2019-08-19	> 10.0	42.5		0.897	91.9		> 10.0	4.06		BGW	Pv893	IPC
UGA-0004654	Plasmocid	RFM-001-042-4	2019-08-19	>3.33	57.5		> 3.33	64		> 10.0	8.73		BGW	Pv893	IPC
UGA-0006483	Dramedilol	RFM-006-831-5	2019-08-19	> 10.0	40.7		> 10.0	15.1		> 10.0	4.34		BGW	Pv893	IPC
UGA-0006593	RGH-5526	RFM-006-295-3	2019-08-19	> 10.0	39.8		> 10.0	46.4		> 10.0	6.13		BGW	Pv893	IPC
UGA-0008889	Dihydralazine	RFM-000-805-9	2019-08-19	> 10.0	38		> 10.0	21.6		> 10.0	-0.873		BGW	Pv893	IPC
UGA-0008949	MS-0735	RFM-001-066-2	2019-08-19	> 10.0	35.8		> 10.0	14.5		> 3.33	11.9		BGW	Pv893	IPC
UGA-0009155	Todralazine	RFM-006-179-0	2019-08-19	> 10.0	42.5		> 10.0	7.67		> 10.0	-2.17		BGW	Pv893	IPC
UGA-0009478	Hydralazine	RFM-002-956-1	2019-08-19	> 10.0	55.7		ND	39.6		> 10.0	10.2		BGW	Pv893	IPC
UGA-0011768	Endralazine	RFM-007-087-1	2019-08-19	> 10.0	44.1		> 10.0	50.8		> 10.0	8.62		BGW	Pv893	IPC
UGA-0012234	Pildralazine	RFM-010-809-8	2019-08-19	1.52	75.4		2.68	64.7		> 10.0	1.58		BGW	Pv893	IPC
UGA-0012344	Mopidralazine	RFM-010-923-9	2019-08-19	> 10.0	31.6		> 10.0	9.02		> 10.0	4.47		BGW	Pv893	IPC
