# Supplementary material for: A drug repurposing approach reveals targetable epigenetic pathways in Plasmodium vivax hypnozoites
Source: eLife. 2025 Sep 30;13:RP98221. doi: 10.7554/eLife.98221 (PMC12483515; doi:10.7554/eLife.98221)
Supplement: Supplementary file 6. [file elife-98221-supp6.xlsx]

## Sheet: CompoundInformation
ReFRAME Screen
Synonyms	Calibr Code	UGA Code	Other Synonym	Smiles	Annotation	Status
Dihydralazine	CBR-001-571-820-4	UGA-0008889		NNc1nnc(c2c1cccc2)NN	Antihypertensive	Registered
Plasmocid	CBR-001-572-110-5	UGA-0004654		CCN(CCCNc1cc(OC)cc2c1nccc2)CC	Antimalarial	Discontinued?
MS-0735	CBR-001-572-134-3	UGA-0008949	sAUJ620	NNC(=S)N/N=C(\c1ccccn1)/C	Analog of A1110U, an Antiviral, Ribonucleotide-reductase-inhibitor	Analog; A1110U is Discontinued
Hydralazine	CBR-001-572-134-3	UGA-0009478	Hydralazine hydrochloride	NNc1nncc2c1cccc2	Benzodiazepine receptor Inhibitor; Calcium channel antagonist	Registered
Colforsin daropate	CBR-001-586-408-1	UGA-0007518		C=C[C@@]1(C)CC(=O)[C@]2([C@@](O1)(C)[C@@H](OC(=O)C)[C@H]([C@@H]1[C@]2(C)[C@@H](O)CCC1(C)C)OC(=O)CCN(C)C)O	Adenylate cyclase Stimulator; Adenylate cyclase stimulant	Registered
PAN-811	CBR-001-586-749-9	UGA-0009341	Triapine	NC(=S)N/N=C/c1ncccc1N	Antiviral Drugs; Alzheimer's Dementia, Treatment of;Stroke, Treatment of; Antineoplastic Enhancing Agents;Cancer Therapy; Antimetabolites;Apoptosis Inhibitors;Chelating Agents;Free Radical Scavengers;Ribonucleoside-Diphosphate Reductase Inhibitors; RIBONUCLEOTIDE REDUCTASE Inhibitor	Phase II
Todralazine	CBR-001-586-916-6	UGA-0009155		CCOC(=O)NNc1nncc2c1cccc2	Antihypertensive; Antimutagenic	Registered
RGH-5526	CBR-001-587-032-3	UGA-0006593		C/C(=N\Nc1ccc(nn1)N1CCOCC1)/CC(=O)OC(C)(C)C	Hypertension, Treatment of; Noradrenaline release modulator;	Phase I
Budralazine	CBR-001-587-246-5	UGA-0000195		CC(=C/C(=N/N=c/1\[nH]ncc2c1cccc2)/C)C	Alpha adrenergic receptor Agonist;	Registered
Dramedilol	CBR-001-593-286-2	UGA-0006483		COc1cc(CCNCC(COc2ccc(nn2)NN=C(C)C)O)ccc1OC	Beta adrenoreceptor antagonist; Hypertension	Phase I
Endralazine	CBR-001-597-262-0	UGA-0011768		NNc1nnc2c(c1)CN(CC2)C(=O)c1ccccc1	Vasodilator;Antihypertensive	Registered
Cadralazine	CBR-001-624-776-0	UGA-0031542		CCOC(=O)NNc1ccc(nn1)N(CC(O)C)CC	Guanylate cyclase stimulant	Discontinued, remains available in Italy and Japan
Pildralazine	CBR-001-635-378-9	UGA-0012234		CN(c1ccc(nn1)NN)CC(O)C	Calcium channel antagonist; Nitric oxide stimulant; Antihypertensive; Vasodilators	Discontinued
Mopidralazine	CBR-001-635-852-4	UGA-0012344		Cc1ccc(n1Nc1ccc(nn1)N1CCOCC1)C	Calcium channel antagonist; Nitric oxide stimulant; Antihypertensive	Preclinical
Rhodamine 123	CBR-050-127-020-8	UGA-0016105		COC(=O)c1ccccc1c1c2ccc(cc2[o+]c2c1ccc(c2)N)N	Prostate Cancer Therapy	Phase I
Narasin	CBR-050-127-705-0	UGA-0015558		CC[C@H]([C@H]1O[C@]2(C=C[C@H]([C@@]3(O2)CC[C@@](O3)(C)[C@H]2CC[C@]([C@@H](O2)C)(O)CC)O)[C@@H](C[C@@H]1C)C)C(=O)[C@H]([C@H]([C@@H]([C@@H]1O[C@H]([C@H](C[C@@H]1C)C)[C@H](C(=O)O)CC)C)O)C	Anticoccidials; Antineoplastic Enhancing Agents; Antiviral Drugs	Preclinical
Poziotinib	CBR-001-574-260-6	UGA-0004210		COC1=C(C=C2C(=C1)N=CN=C2NC3=C(C(=C(C=C3)Cl)Cl)F)OC4CCN(CC4)C(=O)C=C	HER2 inhibitor
Targetmol Epigenetic Library Screen
Synonyms	Targetmol Code	UGA Code	Other Synonym	Smiles	Annotation
Panobinostat	T2383	UGA-0001307	LBH589	CC1=C(C2=CC=CC=C2N1)CCNCC3=CC=C(C=C3)/C=C/C(=O)NO	HDAC inhibitor
Abexinostat	T0431	UGA-0001648	PCI-24781	CN(C)CC1=C(OC2=CC=CC=C21)C(=O)NCCOC3=CC=C(C=C3)C(=O)NO	HDAC inhibitor
Pracinostat	T1890	UGA-0002957	SB939	CCCCC1=NC2=C(N1CCN(CC)CC)C=CC(=C2)/C=C/C(=O)NO	HDAC inhibitor
Cyproheptadine	T0174	UGA-0034033		CN1CCC(=C2C3=CC=CC=C3C=CC4=CC=CC=C42)CC1	GPCR/G Protein
Cerdulatinib	T2487	UGA-0034151		CCS(=O)(=O)N1CCN(CC1)C2=CC=C(C=C2)NC3=NC=C(C(=N3)NC4CC4)C(=O)N	Angiogenesis; Chromatin/Epigenetic; JAK/STAT signaling;
MI2	T2649	UGA-0034162		CCCc1cc2c(ncnc2s1)N1CCN(CC1)C1=NCC(C)(C)S1	Menin-MLL Inhibitor
Raddeanin A	T3878	UGA-0034225		C[C@@H]1O[C@@H](O[C@H]2[C@H](O[C@H]3[C@H](O[C@H]4CC[C@]5(C)[C@H]6CC=C7[C@@H]8CC(C)(C)CC[C@]8(C(=O)O)CC[C@@]7(C)[C@]6(C)CC[C@H]5C4(C)C)OC[C@H](O)[C@@H]3O)O[C@H](CO)[C@@H](O)[C@@H]2O)[C@H](O)[C@H](O)[C@H]1O	Chromatin/Epigenetic; DNA Damage/DNA Repair; NF-Κb
CCT241736	T4428	UGA-0034255		Cc1nn(C)cc1-c1nc2c(N3CCN(Cc4ccc(Cl)cc4)CC3)c(Cl)cnc2[nH]1	Tyrosine Kinase/Adaptors;Cell Cycle/Checkpoint
666-15	T5318	UGA-0034269		NCCCOc1cc2ccccc2cc1C(=O)NCCOc1cc2ccccc2cc1C(=O)Nc1ccc(Cl)cc1O	CREB inhibitor
Givinostat	T6279	UGA-0034295	Givinostat hydrochloride monohydrate	CCN(CC)CC1=CC2=C(C=C1)C=C(COC(=O)NC1=CC=C(C=C1)C(=O)NO)C=C2	HDAC inhibitor
AR42	T6392	UGA-0034305		CC(C)[C@H](C(=O)Nc1ccc(cc1)C(=O)NO)c1ccccc1	HDAC inhibitor
Compounds from Summers et al. 2022	MMV Batch Codes	UGA Code	Other Synonym	Smiles	Annotation
MMV019721	MMV019721-08, MMV019721-10	UGA-0002150	CHEMBL 587715	CCN(CC)S(=O)(=O)c1ccc(Cl)c(C(=O)Nc2ccc3nc(C)sc3c2)c1	Plasmodium falciparum acetyl-coenzyme A synthetase inhibitor
MMV084978	MMV084978-04, MMV084978-05	UGA-0097160		C1(C(=O)NNC(C2=CSN=N2)=O)=CC=C(Cl)C=C1	Plasmodium falciparum acetyl-coenzyme A synthetase inhibitor

## Sheet: Hepatocytes
Primary Human and Simian Hepatocyte lots used in this study
Primary Human Hepatocyte Lots (PHH)				Primary Simian Hepatocyte Lots (PSH)
Lot	Age of Donor	Sex		Lot	Species	Sex
UBV	57 years	Male		CWP	Macaca fascicularis	Male
BGW	50 years	Male		NPI	Macaca fascicularis	Male
QWK	50 years	Female		NDO	Macaca fascicularis	Male
				XXJ	Macaca mulatta	Male
				NNF	Macaca mulatta	Male

## Sheet: Sporozoites
Table of Plasmodium sporozoites uesd in this study; SMRU, Shoklo Malaria Research Unit; MVRU, Mahidol Vivax Research Unit; IPC, Institute Pasteur of Cambodia; NITD, Novartis Institute for Tropical Disease; AFRIMS, Armed Forces Research Institute of Medical Science; ENPRC, Emory National Primate Research Center; ONPRC, Oregon National Primate Research Center; msq, mosquito
Experiment	Figure Part	Plasmodium species	Institute(s)	Principle Investigator	P. vivax case or P. cynomolgi strain	Nonhuman primate species and information	Mosquito Species	Hepatocyte	Sporozoite Count
ReFRAME Primary Screen	Figure 1A, Figure 1-figure supplement 1, Supplemental File 1	P. vivax	SMRU	François Nosten	PID402389, PID423955, PID425583, PID432054		An. dirus	UBV	n/a
ReFRAME Primary Screen	Figure 1A, Figure 1-figure supplement 1, Supplemental File 1	P. vivax	IPC	Benoît Witkowski	Pv593, Pv595, Pv602, Pv603, Pv606, Pv608, Pv609, Pv611, Pv623, Pv624, Pv708, Pv836, Pv838, Pv846, Pv847, Pv849		An. dirus	UBV and BGW	n/a
ReFRAME Hit Dose-Response Confirmation with Calibr Compounds	Figure 1B, Table 1	P. vivax	IPC	Benoît Witkowski	Pv836		An. dirus	BGW	14,000/well
ReFRAME Hit Dose-Response Confirmation with Commercial Compounds	Figure 1B, Table 1	P. vivax	IPC	Benoît Witkowski	Pv836, Pv959, Pv951		An. dirus	BGW	13,100-15,000/well
ReFRAME Hit Dose-Response Confirmation with NITD Compounds	Figure 1B, Figure 1-figure supplement 2	P. vivax	MVRU & NITD	Jetsumon Sattabongkot	VTTY201		An. dirus	BGW	n/a
ReFRAME Hit Dose-Response Confirmation with NITD Compounds	Figure 1B, Supplemental File 2	P. cynomolgi	AFRIMS & NITD	Ratawan Ubalee	B strain		An. dirus	NPI, XXJ, NDO	n/a
ReFRAME Hit Dose-Response Confirmation with UGA Compounds	Figure 1B	P. cynomolgi	UGA	Chet Joyner	Rossan strain	Macaca fuscata, reared at ONPRC, male, 3-5 years old, not geneticall modified	An. dirus	NPI, CWP	n/a
Synergy Study, Experiment 1	Figure 2, Figure 2--figure supplement 1	P. vivax	IPC	Jean Popovici	IV21-075		An. dirus	QWK
Synergy Study, Experiment 2	Figure 2, Figure 2--figure supplement 1	P. vivax	IPC	Jean Popovici	PQRC21-135		An. dirus	QWK
Methyl-cytosine modfication IFA, Case 1	Figure 3, Figure 3--figure supplement 1	P. vivax	IPC	Benoît Witkowski	Pv950		An. dirus	BGW	16,000/well
Methyl-cytosine modfication IFA, Case 2	Figure 3, Figure 3--figure supplement 2	P. vivax	IPC	Benoît Witkowski	Pv951		An. dirus	BGW	15,000/well
Methyl-cytosine modfication IFA, Case 3	Figure 3, Figure 3--figure supplement 3	P. vivax	IPC	Benoît Witkowski	Pv952		An. dirus	BGW	20,000/well
Methyl-cytosine modfication IFA, P. cynomolgi, Experiment 1	Figure 3--figure supplement 5	P. cynomolgi	UGA	Chet Joyner	M/B strain	Macaca fuscata, reared at ONPRC, male, 3-5 years old, not geneticall modified	An. dirus	NPI	23,898/well
Methyl-cytosine modfication IFA, P. cynomolgi, Experiment 2	Figure 3--figure supplement 5	P. cynomolgi	UGA	Chet Joyner	M/B strain	Macaca fuscata, reared at ONPRC, male, 3-5 years old, not geneticall modified	An. dirus	NNF	20,145/well
Mass spec of methyl-cytosine, Sample 1	Figure 4--figure supplement 1	P. cynomolgi	ENPRC	Chet Joyner	M/B strain	Macaca mulatta, Indian origin, reared at ENPRC, male, 12 years old, not genetically modified	An. dirus		4800000
Mass spec of methyl-cytosine negative control glands for Sample 1	Figure 4--figure supplement 1	Negative	ENPRC	Chet Joyner	N/A		An. dirus		glands from 75 msq
Mass spec of methyl-cytosine, Sample 2	Figure 4--figure supplement 1	P. cynomolgi	ENPRC	Chet Joyner	M/B strain	Macaca mulatta, Indian origin, reared at ENPRC, male, 12 years old, not genetically modified	An. dirus		2800000
Mass spec of methyl-cytosine negative control glands for Sample 2	Figure 4--figure supplement 1	Negative	ENPRC	Chet Joyner	N/A		An. dirus		glands from 43 msq
Mass spec of methyl-cytosine, Sample 3	Figure 4--figure supplement 1	P. cynomolgi	ENPRC	Chet Joyner	M/B strain	Macaca mulatta, Indian origin, reared at ENPRC, male, 12 years old, not genetically modified	An. dirus		2600000
Mass spec of methyl-cytosine negative control glands for Sample 3	Figure 4--figure supplement 1	Negative	ENPRC	Chet Joyner	N/A		An. dirus		glands from 56 msq
Mass spec of methyl-cytosine, Case 1	Figure 4--figure supplement 1	P. vivax	IPC	Benoît Witkowski	Pv922		An. dirus		5000000
Mass spec of methyl-cytosine, negative control glands for Case 1	Figure 4--figure supplement 1	Negative	IPC	Benoît Witkowski	N/A		An. dirus		glands from 50 msq
Mass spec of methyl-cytosine, Case 2	Figure 4--figure supplement 1	P. vivax	IPC	Benoît Witkowski	Pv923		An. dirus		10000000
Mass spec of methyl-cytosine, negative control glands for Case 2	Figure 4--figure supplement 1	Negative	IPC	Benoît Witkowski	N/A		An. dirus		glands from 50 msq
Mass spec of methyl-cytosine, Case 3	Figure 4--figure supplement 1	P. vivax	IPC	Benoît Witkowski	Pv923		An. dirus		10000000
Mass spec of methyl-cytosine, negative control glands for Case 3	Figure 4--figure supplement 1	Negative	IPC	Benoît Witkowski	N/A		An. dirus		glands from 50 msq
DNMT activity assay, Sample 1	Figure 4--figure supplement 1	P. cynomolgi	ENPRC	Chet Joyner	B strain		An. dirus		14100000
DNMT activity assay, negative control glands for Sample 1	Figure 4--figure supplement 1	Negative	ENPRC	Chet Joyner	N/A		An. dirus		glands from 100 msq
DNMT activity assay, Sample 2	Figure 4--figure supplement 1	P. cynomolgi	ENPRC	Chet Joyner	M/B strain	Macaca mulatta, Indian origin, reared at ENPRC, male, 12 years old, not genetically modified	An. dirus		20700000
DNMT activity assay, negative control glands for Sample 2	Figure 4--figure supplement 1	Negative	ENPRC	Chet Joyner	N/A		An. dirus		glands from 100 msq
DNMT activity assay, Sample 1	Figure 4--figure supplement 1	P. vivax	IPC	Benoît Witkowski	Pv950		An. dirus		21000000
DNMT activity assay, negative control glands for Sample 1	Figure 4--figure supplement 1	Negative	IPC	Benoît Witkowski	N/A		An. dirus		glands from 238 msq
DNMT activity assay, Sample 2	Figure 4--figure supplement 1	P. vivax	IPC	Benoît Witkowski	Pv951		An. dirus		20000000
DNMT activity assay, negative control glands for Sample 2	Figure 4--figure supplement 1	Negative	IPC	Benoît Witkowski	N/A		An. dirus		glands from 157 msq
BS-seq, Case 1	Figure 4, Figure 4--figure supplement 2, Supplemental File 3	P. vivax	IPC	Benoît Witkowski	Pv640		An. dirus		9800000
BS-seq, Case 2	Figure 4, Figure 4--figure supplement 2, Supplemental File 3	P. vivax	IPC	Benoît Witkowski	Pv635		An. dirus		12300000
BS-seq, Case 3	Figure 4, Figure 4--figure supplement 2, Supplemental File 3	P. vivax	IPC	Benoît Witkowski	Pv644		An. dirus		15060000
BS-seq, Sample 1	Figure 4, Figure 4--figure supplement 3, Supplemental File 3	P. cynomolgi	ENPRC	Chet Joyner	M/B strain	Macaca mulatta, Indian origin, reared at ENPRC, male, 12 years old, not genetically modified	An. dirus		14100000
BS-seq, Sample 2	Figure 4, Figure 4--figure supplement 3, Supplemental File 3	P. cynomolgi	ENPRC	Chet Joyner	M/B strain	Macaca mulatta, Indian origin, reared at ENPRC, male, 12 years old, not genetically modified	An. dirus		20700000
ReFRAME hit confirmation in 12-day assay	Figure 5-figure supplement 2	P. vivax	IPC	Benoît Witkowski	Pv893		An. dirus	BGW	20,000/well
Epigenetic Library Primary Screen	Figure 5-figure supplement 3	P. vivax	SMRU	François Nosten	2020-013, 2020-014		An. dirus	BGW	33,000-38,000/well
Epigenetic Library Hit Dose-Response Confirmation	Table 2	P. vivax	IPC	Benoît Witkowski	Pv1014, Pv1020, Pv1024		An. dirus	BGW	15,000-18,000/well
MMV acetyl-CoA synthetase inhibitor Dose-Response	Table 2	P. vivax	IPC	Jean Popovici	PQRC21-113		An. dirus	BGW, QWK	15,000-18,000/well
