# Supplementary material for: A drug repurposing approach reveals targetable epigenetic pathways in Plasmodium vivax hypnozoites
Source: eLife. 2025 Sep 30;13:RP98221. doi: 10.7554/eLife.98221 (PMC12483515; doi:10.7554/eLife.98221)
Supplement: Table 1—source data 1. [file elife-98221-table1-data1.xlsx]

## Sheet: Figure1-PvLS-IPC
Table of individual P. vivax liver stage runs using the 8-day assay at IPC for Figure 1B. Yellow: inactivity of Monensin control likely due to solubility issues during source plate preparation. Bars represent SD of replicate wells.
Molecule Name	Synonyms	Batch Ref #	Run Date	Radical Cure Schizont Net Growth Area EC50 (μM)	Radical Cure Schizont Net Growth Area Maximum Inhibtion (%)	Radical Cure Schizont Net Growth Area Plot	Radical Cure Hypnozoite Quantity EC50 (μM)	Radical Cure Hypnozoite Quantity Maximum Inhibition (%)	Radical Cure Hypnozoite Quantity Plot	Radical Cure Toxicity CC50 (μM)	Radical Cure Toxicity Maximum Inhibtion (%)	Radical Cure Toxicity Plot	Primary Human Hepatocyte Lot	P. vivax Case	Screen Location
UGA-0031542	Cadralazine	RFM-008-828-8	2019-05-20	0.351	75.9		0.295	72.9		> 10.0	1.07		BGW	Pv836	IPC
UGA-0031542	Cadralazine	B2417	2019-05-22	0.621	85.9		1.02	92.3		> 50.0	7.13		BGW	Pv836	IPC
UGA-0031542	Cadralazine	RFM-008-828-8	2019-06-05	ND	65.5		0.34	87.8		> 10.0	4.13		BGW	Pv836	IPC
UGA-0000195	Budralazine	RFM-006-499-3	2019-05-20	> 10.0	39.5		> 10.0	28.3		> 10.0	-0.897		BGW	Pv836	IPC
UGA-0000195	Budralazine	RFM-006-499-3	2019-06-05	> 10.0	64		> 10.0	13.3		> 10.0	0.298		BGW	Pv836	IPC
UGA-0000247	KDU691	CBR-001-210-496-0	2019-05-20	0.21	81.6		> 3.00	19.6		> 3.00	-1.42		BGW	Pv836	IPC
UGA-0000247	KDU691	CBR-001-210-496-0	2019-05-28	> 0.111	61.8		> 3.00	8.91		> 3.00	-1.66		BGW	Pv836	IPC
UGA-0000247	KDU691	CBR-001-210-496-0	2019-06-05	0.0331	84.9		> 3.00	12.7		> 3.00	2.89		BGW	Pv836	IPC
UGA-0000247	KDU691	CBR-001-210-496-0	2019-06-06	> 0.333	67.2		> 3.00	0.523		> 3.00	4.54		BGW	Pv836	IPC
UGA-0002106	Monensin	CBR-001-547-426-7	2019-05-20	0.198	95.3		> 5.00	30		> 5.00	3.24		BGW	Pv836	IPC
UGA-0002106	Monensin	CBR-001-547-426-7	2019-05-28	0.232	92.3		> 5.00	14.2		> 5.00	-1.61		BGW	Pv836	IPC
UGA-0002106	Monensin	CBR-001-547-426-7	2019-06-05	0.14	96.7		> 5.00	25.1		> 5.00	0.428		BGW	Pv836	IPC
UGA-0002106	Monensin	CBR-001-547-426-7	2019-06-06	0.29	77.8		> 5.00	-2.26		> 5.00	3.26		BGW	Pv836	IPC
UGA-0002590	Nigericin	CBR-001-844-586-8	2019-05-20	0.00499	105		0.0128	101		> 0.100	4.33		BGW	Pv836	IPC
UGA-0002590	Nigericin	MMV638472-03	2019-05-22	0.00803	100		0.0227	101		> 0.200	10.8		BGW	Pv836	IPC
UGA-0002590	Nigericin	CBR-001-844-586-8	2019-05-28	0.00286	100		0.0109	102		> 0.100	13.7		BGW	Pv836	IPC
UGA-0002590	Nigericin	CBR-001-844-586-8	2019-06-05	0.00266	106		0.00897	100		> 0.100	9.8		BGW	Pv836	IPC
UGA-0002590	Nigericin	CBR-001-844-586-8	2019-06-06	> 0.100	93.5		0.0121	100		> 0.100	5.87		BGW	Pv836	IPC
UGA-0004210	Poziotinib	RFM-003-056-8	2019-05-20	> 10.0	50.9		> 10.0	36.2		> 10.0	15.4		BGW	Pv836	IPC
UGA-0004210	Poziotinib	RFM-003-056-8	2019-06-05	ND	70.1		> 10.0	28.5		> 10.0	6.52		BGW	Pv836	IPC
UGA-0004654	Plasmocid	RFM-001-042-4	2019-05-20	ND	59.3		> 3.33	58		> 10.0	11.3		BGW	Pv836	IPC
UGA-0004654	Plasmocid	RFM-001-042-4	2019-06-05	> 1.11	81.7		> 1.11	56.5		> 10.0	8.24		BGW	Pv836	IPC
UGA-0006483	Dramedilol	RFM-006-831-5	2019-05-20	> 10.0	43.8		> 10.0	30.6		> 10.0	6.24		BGW	Pv836	IPC
UGA-0006483	Dramedilol	RFM-006-831-5	2019-06-05	> 10.0	77.9		> 10.0	44.6		> 10.0	3.32		BGW	Pv836	IPC
UGA-0006593	RGH-5526	RFM-006-295-3	2019-05-20	> 10.0	52.9		> 10.0	24.6		> 10.0	3.6		BGW	Pv836	IPC
UGA-0006593	RGH-5526	RFM-006-295-3	2019-06-05	> 10.0	64.1		> 10.0	23		> 10.0	3.16		BGW	Pv836	IPC
UGA-0007518	Colforsin daropate	RFM-005-675-7	2019-05-28	> 10.0	39.1		0.0855	61.6		> 10.0	7.94		BGW	Pv836	IPC
UGA-0007518	Colforsin daropate	RFM-005-675-7	2019-06-06	> 10.0	60.5		> 10.0	17.4		> 10.0	7.03		BGW	Pv836	IPC
UGA-0008889	Dihydralazine	RFM-000-805-9	2019-05-20	> 10.0	43.1		> 10.0	17.6		> 10.0	-1.23		BGW	Pv836	IPC
UGA-0008889	Dihydralazine	RFM-000-805-9	2019-06-05	> 10.0	68.9		> 10.0	24.7		> 10.0	4.8		BGW	Pv836	IPC
UGA-0008949	MS-0735	RFM-001-066-2	2019-05-20	> 3.33	65.4		> 10.0	29.2		> 10.0	-0.21		BGW	Pv836	IPC
UGA-0008949	MS-0735	RFM-001-066-2	2019-06-05	> 3.33	86.4		3.76	64.5		> 10.0	4.43		BGW	Pv836	IPC
UGA-0009155	Todralazine	RFM-006-179-0	2019-05-20	> 10.0	31.7		> 10.0	4.64		> 10.0	-5.38		BGW	Pv836	IPC
UGA-0009155	Todralazine	RFM-006-179-0	2019-06-05	> 10.0	79.5		> 10.0	31.1		> 10.0	4.97		BGW	Pv836	IPC
UGA-0009341	PAN-811	RFM-006-013-9	2019-05-28	> 10.0	35.9		> 10.0	40.5		> 10.0	8.16		BGW	Pv836	IPC
UGA-0009341	PAN-811	RFM-006-013-9	2019-06-06	> 10.0	40.9		> 10.0	29.4		> 10.0	8.9		BGW	Pv836	IPC
UGA-0009478	Hydralazine	RFM-002-956-1	2019-05-20	> 10.0	47.4		ND	48.7		> 10.0	17.8		BGW	Pv836	IPC
UGA-0009478	Hydralazine	S256202	2019-05-22	3.79	81.5		> 16.7	89.8		> 50.0	3.75		BGW	Pv836	IPC
UGA-0009478	Hydralazine	RFM-002-956-1	2019-06-05	> 10.0	48.6		1.78	70		> 10.0	7.21		BGW	Pv836	IPC
UGA-0011768	Endralazine	RFM-007-087-1	2019-05-20	> 10.0	47.6		> 10.0	11.6		> 10.0	7.22		BGW	Pv836	IPC
UGA-0011768	Endralazine	RFM-007-087-1	2019-06-05	ND	73.4		> 10.0	38.7		> 10.0	17.7		BGW	Pv836	IPC
UGA-0012234	Pildralazine	RFM-010-809-8	2019-05-20	> 1.11	66.2		1.28	75.2		> 10.0	0.477		BGW	Pv836	IPC
UGA-0012234	Pildralazine	RFM-010-809-8	2019-06-05	ND	98.1		0.532	94.6		> 10.0	3.74		BGW	Pv836	IPC
UGA-0012344	Mopidralazine	RFM-010-923-9	2019-05-20	> 10.0	30.2		> 10.0	26.9		> 10.0	1.07		BGW	Pv836	IPC
UGA-0012344	Mopidralazine	RFM-010-923-9	2019-06-05	ND	71.2		> 10.0	24.7		> 10.0	2.98		BGW	Pv836	IPC
UGA-0015558	Narasin	RFM-012-760-6	2019-05-28	> 3.33	81.3		2.24	88.8		> 10.0	10		BGW	Pv836	IPC
UGA-0015558	Narasin	RFM-012-760-6	2019-06-06	0.315	123		1.16	99.5		> 10.0	10.7		BGW	Pv836	IPC
UGA-0016105	Rhodamine 123	RFM-012-847-2	2019-05-28	> 3.33	97.7		3.62	103		> 10.0	9.55		BGW	Pv836	IPC
UGA-0016105	Rhodamine 123	RFM-012-847-2	2019-06-06	> 3.33	90.9		9.79	81.7		> 10.0	12.7		BGW	Pv836	IPC

## Sheet: Table1-Counterscreens-Calibr
Table of counterscreens performed at Calibr for Table 1. Pbluc, P. berghei luciferase liver stage assay; Dd2, P. falciparum strain Dd2 asexual blood stage assay; HEK293T, cytotoxicity assay; HepG2, cytotoxicity assay
							Dose Response Overlays				PbLuc run 1									PbLuc run 2									PbLuc run 3									PbLuc run 4									PbLuc run 5
Compound ID	Compound	Library/Category	Smiles	Annotation Code	Annotation	Status	PbLuc Overlay	PfSG Dd2 Overlay	HEK293T Overlay	HepG2 Overlay	Curve	qAC50 Mode	qAC50	Log AC50	SE Log AC50	S0	Sinf	nHill	Data Mode	Curve	qAC50 Mode	qAC50	Log AC50	SE Log AC50	S0	Sinf	nHill	Data Mode	Curve	qAC50 Mode	qAC50	Log AC50	SE Log AC50	S0	Sinf	nHill	Data Mode	Curve	qAC50 Mode	qAC50	Log AC50	SE Log AC50	S0	Sinf	nHill	Data Mode	Curve	qAC50 Mode	qAC50
CBR-001-210-496-0	KDU691	control	CNC(=O)c1ccc(cc1)c1cnc2n1cc(nc2)C(=O)N(c1ccc(cc1)Cl)C	NTD	Antimalarial; Plasmodium PI(4)K inhibitor	Preclinical						=	4.8205e-08	-7.31691	0.0432668	-5.33433	-102.389	4	decreasing		=	2.5059e-08	-7.60104	0.031046	6.83453	-100	1.7214	decreasing		=	3.81719e-08	-7.41826	0.0382767	11.3403	-100.531	2.61214	decreasing		=	4.65794e-08	-7.33181	0.0359688	25.6817	-98.6184	3.46171	decreasing		=	6.96393e-08
CBR-001-547-426-7	Monensin	control	CC[C@]1(CC[C@@H](O1)[C@]1(C)CC[C@]2(C[C@H](O)[C@@H](C)[C@H](O2)[C@@H](C)[C@@H](OC)C(C)C([O-])=O)O1)[C@@H]1O[C@H](C[C@@H]1C)[C@H]1O[C@@](O)(CO)[C@H](C)C[C@@H]1C	ABX	Antibiotic; Polyether ionophore	Animal approved (feed)						=	7.13023e-11	-10.1469	0.0125032	20.7757	-99.8176	3.70506	decreasing		=	7.22867e-11	-10.1409	0.0259084	0	-100	4	decreasing		=	1.09439e-10	-9.96083	0.048296	28.1863	-100.672	2.4104	decreasing		=	2.61681e-10	-9.58223	0.0720024	0	-101.574	1.53365	decreasing		=	1.00996e-09
CBR-001-844-586-8	Nigericin	control	COC1CC(CC2CCC(C(O2)C(C(=O)O)C)C)OC2(C1C)OC(CC2C)(C)C1CCC(O1)(C)C1OC(CC1C)C1OC(O)(CO)C(CC1C)C	ABX	Antibiotic; Polyether ionophore	Preclinical						=	1.65645e-10	-9.78082	0.0483336	0	-102.572	4	decreasing		<	3.38702e-10	-11.4702	0.297645	0	-100	0.5	decreasing (super-active)		=	1.27018e-10	-9.89613	0.0324238	30	-101.131	2.97568	decreasing		=	2.3048e-10	-9.63737	0.0359082	30	-103.268	2.84535	decreasing		=	4.26816e-09
CBR-001-546-303-3	Puromycin	cytotoxicity control	COc1ccc(C[C@H](N)C(=O)N[C@@H]2[C@@H](CO)O[C@H]([C@@H]2O)n2cnc3c(ncnc23)N(C)C)cc1	ABX	Antibiotic protein synthesis inhibitor; Translational inhibitor	Biological testing																								=	8.56585e-07	-6.06723	0.061038	8.25484	-99.6923	4	decreasing
CBR-001-843-947-9	Puromycin	cytotoxicity control	OC[C@H]1O[C@H]([C@@H]([C@@H]1NC(=O)[C@H](Cc1ccc(cc1)OC)N)O)n1cnc2c1ncnc2N(C)C	ABX	Antibiotic protein synthesis inhibitor; Translational inhibitor	Biological testing																																										=	1.17676e-06
CBR-001-624-776-0	Cadralazine	ReFRAME - hit	CCOC(=O)NNc1ccc(nn1)N(CC(O)C)CC	AHYP	Antihypertensive; Guanylate cyclase stimulant	Registered (Italy); Withdrawn in rest of Europe						>	5e-06						inactive		>	2e-05						inactive		>	1e-05						inactive		>	1e-05						inactive		>	1e-05
CBR-050-127-705-0	Narasin	ReFRAME - hit (rediscovered)	CC[C@H]([C@H]1O[C@]2(C=C[C@H]([C@@]3(O2)CC[C@@](O3)(C)[C@H]2CC[C@]([C@@H](O2)C)(O)CC)O)[C@@H](C[C@@H]1C)C)C(=O)[C@H]([C@H]([C@@H]([C@@H]1O[C@H]([C@H](C[C@@H]1C)C)[C@H](C(=O)O)CC)C)O)C	ABX	Anticoccidial; Antineoplastic Enhancing Agent; Antiviral	Preclinical; Animal approved (feed)						=	7.23343e-10	-9.14066	0.0135676	22.7077	-100.258	2.46855	decreasing		<	3.38702e-10	-10.8754	0.29599	0	-100	0.5	decreasing (super-active)		=	3.99521e-10	-9.39846	0.0362413	7.25296	-99.6644	2.02647	decreasing		=	4.65948e-10	-9.33166	0.0259036	30	-99.0008	2.86724	decreasing		=	3.25162e-09
CBR-001-635-378-9	Pildralazine	ReFRAME - hit	CN(c1ccc(nn1)NN)CC(O)C	AHYP	Antihypertensive; Calcium channel antagonist; Nitric oxide stimulant	Registered (discontinued)						>	5e-06						inactive		>	2e-05						inactive		>	1e-05						inactive		>	1e-05						inactive		>	1e-05
CBR-050-127-020-8	Rhodamine 123	ReFRAME - hit	COC(=O)c1ccccc1c1c2ccc(cc2[o+]c2c1ccc(c2)N)N	ONC	Prostate Cancer Therapy; P-Glycoprotein (MDR-1; ABCB1) Inhibitor	Phase I						>	5e-06						inactive		>	2e-05	-4.38116	0.286513	-13.0056	-100	0.5	decreasing (weakly active)		>	1e-05						inactive		>	1e-05						inactive		>	1e-05
CBR-001-572-134-3	MS-0735	ReFRAME - hit	NNC(=S)N/N=C(\c1ccccn1)/C	AV	Antiviral; Analog of ribonucleotide reductase inhibitor	Biological Testing						=	6.47717e-07	-6.18861	0.0614667	-8.37538	-102.686	2.0221	decreasing		=	6.03917e-07	-6.21902	0.0535681	-0.154947	-100	1.19076	decreasing		=	4.74175e-07	-6.32406	0.0793359	9.22603	-100.596	2.90479	decreasing		=	5.69708e-07	-6.24435	0.0957834	10.6709	-89.5055	2.69079	decreasing		=	7.11798e-07
CBR-001-574-160-3	Hydralazine	ReFRAME - hit	NNc1nncc2c1cccc2	AHYP	Antihypertensive; Benzodiazepine receptor inhibitor; Calcium channel antagonist	Registered						>	5e-06						inactive		>	2e-05						inactive		>	1e-05						inactive		>	1e-05						inactive		>	1e-05
CBR-001-572-110-5	Plasmocid	ReFRAME - hit	CCN(CCCNc1cc(OC)cc2c1nccc2)CC	NTD	Antimalarial; 8-Aminoquinoline	No longer in use						=	3.30553e-06	-5.48076	0.082142	-1.70017	-100	1.19514	decreasing		=	2.5074e-06	-5.60078	0.100453	1.736	-100	0.556778	decreasing		=	2.45937e-06	-5.60918	0.09565	12.3051	-87.6949	1.58725	decreasing		>	1e-05	-4.92949	0.185768	25.9529	-100	0.76615	decreasing (weakly active)		=	8.07513e-07
CBR-001-586-408-1	Colforsin daropate	ReFRAME - hit	C=C[C@@]1(C)CC(=O)[C@]2([C@@](O1)(C)[C@@H](OC(=O)C)[C@H]([C@@H]1[C@]2(C)[C@@H](O)CCC1(C)C)OC(=O)CCN(C)C)O	AHYP	Antihypertensive; Adenylate cyclase stimulator; Glaucoma therapy	Registered (Haert Failure: Japan; Glaucoma: India, Europe, Australia); Pre-Registered (Glaucoma: USA)						>	5e-06	-5.21765	0.0993625	-5.83249	-100	1.10548	decreasing (weakly active)		>	2e-05	-4.47931	0.143304	-9.66121	-100	0.767383	decreasing (weakly active)		>	1e-05						inactive		>	1e-05						inactive		>	1e-05
CBR-001-574-260-6	Poziotinib	ReFRAME - hit	C=CC(=O)N1CCC(CC1)Oc1cc2c(ncnc2cc1OC)Nc1ccc(c(c1F)Cl)Cl	ONC	EGFR (HER1; erbB1) inhibitor; ERBB-2- and -4-receptor-antagonist; HER2 (erbB2) inhibitor; HER4 (erbB4) inhibitor; PAN-HER inhibitor; Protein-tyrosine-kinase-inhibitor; Signal Transduction Modulator; Anticancer; Breast Cancer, Gastric, Head and Neck, Lung Therapy	Phase II																								=	6.38538e-06	-5.19481	0.077143	11.2444	-100	4	decreasing		=	6.84679e-06	-5.16451	0.0890526	30	-100	4	decreasing		=	4.51219e-06
CBR-001-587-246-5	Budralazine	ReFRAME - hydralazine analog	CC(=C/C(=N/N=c/1\[nH]ncc2c1cccc2)/C)C	AHYP	Antihypertensive; Alpha adrenergic receptor agonist	Registered outside of US						=	3.72655e-06	-5.42869	0.074685	-3.20438	100	3.85096	increasing		=	3.18265e-06	-5.49721	0.0734936	-2.77635	100	3.47978	increasing		=	4.34836e-07	-6.36167	0.0870271	-0.355601	81.8999	2.16924	increasing		=	8.22028e-07	-6.08511	0.222436	22.4482	100	1.76256	increasing		=	9.77595e-07
CBR-001-586-916-6	Todralazine	ReFRAME - hydralazine analog	CCOC(=O)NNc1nncc2c1cccc2	AHYP	Antihypertensive; Antimutagenic	Preclinical?						>	5e-06						inactive		>	2e-05						inactive		>	1e-05						inactive		>	1e-05						inactive		>	1e-05
CBR-001-571-820-4	Dihydralazine	ReFRAME - hydralazine analog	NNc1nnc(c2c1cccc2)NN	AHYP	Antihypertensive	Biological Testing						=	2.02298e-06	-5.69401	0.115139	-1.97616	-100	0.845709	decreasing		=	3.64266e-06	-5.43858	0.068658	6.52475	-100	0.802794	decreasing		=	2.20119e-06	-5.65734	0.115271	6.26914	-100	1.07206	decreasing		=	3.96264e-06	-5.40202	0.0966764	19.0191	-100	1.61643	decreasing		=	3.6177e-06
CBR-001-586-749-9	PAN-811	ReFRAME - hydralazine analog	NC(=S)N/N=C/c1ncccc1N	ONC	Cancer Therapy; Antineoplastic Enhancing Agent (Chemosensitizer); Treatment of Alzheimer's Dementia, Stroke, Leukemia; Antimetabolite; Apoptosis Inhibitor; Chelating Agent; Free Radical Scavenger; Antiviral; Ribonucleoside-Diphosphate Reductase Inhibitor	Phase II						=	1.00146e-06	-5.99937	0.0713154	-1.31768	-102.44	4	decreasing		=	5.28759e-07	-6.27674	0.0799019	6.09197	-100	4	decreasing		=	2.20104e-06	-5.65737	0.0910552	19.1846	-107.648	4	decreasing		>	1e-05						inactive		=	2.02191e-06
CBR-001-587-032-3	RGH-5526	ReFRAME - hydralazine analog	C/C(=N\Nc1ccc(nn1)N1CCOCC1)/CC(=O)OC(C)(C)C	AHYP	Antihypertensive; Noradrenaline release modulator	Phase I						>	5e-06						inactive		>	2e-05						inactive		>	1e-05						inactive		>	1e-05						inactive		>	1e-05
CBR-001-593-286-2	Dramedilol	ReFRAME - hydralazine analog	COc1cc(CCNCC(COc2ccc(nn2)NN=C(C)C)O)ccc1OC	AHYP	Antihypertensive; Beta adrenoreceptor antagonist	Phase I						>	5e-06						inactive		>	2e-05						inactive		>	1e-05						inactive		>	1e-05						inactive		>	1e-05
CBR-001-597-262-0	Endralazine	ReFRAME - hydralazine analog	NNc1nnc2c(c1)CN(CC2)C(=O)c1ccccc1	AHYP	Antihypertensive; Guanylate cyclase stimulant	Registered (discontinued)						>	5e-06						inactive		>	2e-05						inactive		>	1e-05						inactive		>	1e-05						inactive		>	1e-05
CBR-001-635-852-4	Mopidralazine	ReFRAME - hydralazine analog	Cc1ccc(n1Nc1ccc(nn1)N1CCOCC1)C	AHYP	Antihypertensive; Calcium channel antagonist; Nitric oxide stimulant	Phase II (discontinued)						>	5e-06						inactive		>	2e-05						inactive		>	1e-05						inactive		>	1e-05						inactive		>	1e-05
[truncated: 114 more columns]

## Sheet: SourceData1-PcABS-UGA
Table of P. cynomolgi asexual blood stage strain DC runs at UGA. Bars represent SD of replicate wells.
Molecule Name	Synonyms	Batch Ref #	Run Date	PcABS EC50 (μM)	PcABS Maximum Inhibition (%)	PcABS Plot	Strain
UGA-0000195	Budralazine	D3019	2020-01-21	> 5.000	15.439		P. cynomolgi DC
UGA-0000195	Budralazine	D3019	2020-01-22	> 5.000	7.708		P. cynomolgi DC
UGA-0031542	Cadralazine	B2417	2020-01-21	> 5.000	42.556		P. cynomolgi DC
UGA-0031542	Cadralazine	B2417	2020-01-22	> 5.000	31.21		P. cynomolgi DC
UGA-0009478	Hydralazine	S256202	2020-01-21	> 5.000	23.224		P. cynomolgi DC
UGA-0009478	Hydralazine	S256202	2020-01-22	> 5.000	23.802		P. cynomolgi DC

## Sheet: SourceData1-PfABS-UGA
Table of P. falciparum asexual blood stage strain W2 runs at UGA. Bars represent SD of replicate wells.
Molecule Name	Synonyms	Batch Ref #	Run Date	PfABS EC50 (μM)	PfABS Maximum Inhibition (%)	PfABS Plot	Strain
UGA-0000195	Budralazine	D3019	2020-02-10	> 5.00	25.6		W2
UGA-0000195	Budralazine	D3019	2019-08-07	> 5.00	8.49		W2
UGA-0009478	Hydralazine	S256202	2020-02-10	> 5.00	46.9		W2
UGA-0009478	Hydralazine	S256202	2019-08-07	> 5.00	23.9		W2
UGA-0015560	Dihydroartemisinin	SLCC9894	2020-02-10	0.039	100		W2
UGA-0015560	Dihydroartemisinin	SLCC9894	2019-08-07	0.0363	101		W2
UGA-0031542	Cadralazine	B2417	2020-02-10	> 5.00	31.3		W2
UGA-0031542	Cadralazine	B2417	2019-08-07	> 5.00	11.6		W2
