# Supplementary material for: A drug repurposing approach reveals targetable epigenetic pathways in Plasmodium vivax hypnozoites
Source: eLife. 2025 Sep 30;13:RP98221. doi: 10.7554/eLife.98221 (PMC12483515; doi:10.7554/eLife.98221)
Supplement: Table 2—source data 1. [file elife-98221-table2-data1.xlsx]

## Sheet: Table2-PvLS-IPC
Table of individual P. vivax liver stage runs using the 12-day (+ABT) assay for Table 2. Red line represents nigericin control. Bars represent SD of replicate wells.
Molecule Name	Synonyms	Batch Ref #	Run Date	Radical Cure Schizont Net Growth Area EC50 (μM)	Radical Cure Schizont Net Growth Area Maximum Inhibtion (%)	Radical Cure Schizont Net Growth Area Plot	Radical Cure Hypnozoite Quantity EC50 (μM)	Radical Cure Hypnozoite Quantity Maximum Inhibition (%)	Radical Cure Hypnozoite Quantity Plot	Radical Cure Toxicity CC50 (μM)	Radical Cure Toxicity Maximum Inhibtion (%)	Radical Cure Toxicity Plot	Primary Human Hepatocyte Lot	P. vivax Case	Screen Location
UGA-0000243	MMV390048	MMV390048-09	2023-07-16	0.0146	87.7		> 3.30	48.5		> 3.30	3.49		QWK	PQRC21-113	IPC
UGA-0000243	MMV390048	MMV390048-09	2023-07-13	0.0141	98		0.0545	84.8		> 3.30	4.18		BGW	PQRC21-113	IPC
UGA-0000243	MMV390048	MMV390048-09	2023-07-17	0.00795	94.7		> 1.11	65		> 3.33	11.3		QWK	PQRC21-113	IPC
UGA-0000243	MMV390048	MMV390048-09	2023-07-14	0.0151	100		0.0248	82.6		> 3.30	4.92		BGW	PQRC21-113	IPC
UGA-0001307	Panobinostat	T2383	2020-10-29	0.0798	98.7		0.143	84.3		2.8	41.5		BGW	Pv1020	IPC
UGA-0001307	Panobinostat	T2383	2020-10-01	0.128	94.5		0.0783	79.7		1.55	39.3		BGW	Pv1014	IPC
UGA-0001648	Abexinostat	T0431	2020-10-29	3.18	99.4		> 3.33	78.7		> 10.0	11		BGW	Pv1020	IPC
UGA-0001648	Abexinostat	T0431	2020-10-01	9.36	86.3		> 3.33	81.5		> 10.0	18.1		BGW	Pv1014	IPC
UGA-0002150	MMV019721	MMV019721-10	2023-07-16	> 50.0	38.7		4.97	95.3		> 16.7	75.9		QWK	PQRC21-113	IPC
UGA-0002150	MMV019721	MMV019721-10	2023-07-13	2.15	96.4		4.33	84.8		> 16.7	80.4		BGW	PQRC21-113	IPC
UGA-0002150	MMV019721	MMV019721-08	2023-07-17	16.7	62.5		5.06	81.2		> 16.7	73.2		QWK	PQRC21-113	IPC
UGA-0002150	MMV019721	MMV019721-08	2023-07-14	4.87	77.7		5.08	73.9		> 16.7	90.8		BGW	PQRC21-113	IPC
UGA-0002590	Nigericin	MMV638472-04	2023-07-16	0.0344	95		0.0247	100		> 0.200	11		QWK	PQRC21-113	IPC
UGA-0002590	Nigericin	MMV638472-04	2023-07-13	0.012	100		0.0185	98.5		> 0.200	15.8		BGW	PQRC21-113	IPC
UGA-0002590	Nigericin	MMV638472-04	2023-07-17	0.0211	94		0.0303	100		> 0.200	12.2		QWK	PQRC21-113	IPC
UGA-0002590	Nigericin	MMV638472-04	2023-07-14	0.0198	100		0.022	97.1		> 0.200	24.1		BGW	PQRC21-113	IPC
UGA-0002590	Nigericin	MMV638472-03	2020-11-28	0.00253	100		0.00449	100		> 0.200	0.404		BGW	Pv1024	IPC
UGA-0002590	Nigericin	MMV638472-03	2020-10-29	0.00181	99.9		0.00309	99.8		> 0.200	6.72		BGW	Pv1020	IPC
UGA-0002590	Nigericin	MMV638472-03	2020-10-01	0.00166	99.9		0.00298	98.9		> 0.200	6.88		BGW	Pv1014	IPC
UGA-0002590	Nigericin	MMV638472-03	2020-10-02	0.00222	99.6		0.00497	98.7		> 0.200	6.95		BGW	Pv1014	IPC
UGA-0002957	Pracinostat	T1890	2020-10-29	1.37	98.1		3.85	88.7		> 10.0	17.7		BGW	Pv1020	IPC
UGA-0002957	Pracinostat	T1890	2020-10-01	2.65	94.3		5.82	82.3		> 10.0	14.2		BGW	Pv1014	IPC
UGA-0034033	Cyproheptadine	T0174	2020-10-29	3.69	79.4		9.98	79.3		> 10.0	7.93		BGW	Pv1020	IPC
UGA-0034033	Cyproheptadine	T0174	2020-10-01	> 3.33	78.7		> 3.33	73.2		> 10.0	12.8		BGW	Pv1014	IPC
UGA-0034151	Cerdulatinib	T2487	2020-11-28	> 3.33	81.2		3.32	91.9		> 10.0	-4.09		BGW	Pv1024	IPC
UGA-0034151	Cerdulatinib	T2487	2020-10-02	9.18	79.3		6.45	76.1		> 10.0	12		BGW	Pv1014	IPC
UGA-0034162	MI2	T2649	2020-11-28	> 3.33	85.7		> 3.33	81.2		> 10.0	-0.288		BGW	Pv1024	IPC
UGA-0034162	MI2	T2649	2020-10-02	> 3.33	84.4		> 3.33	68.9		> 10.0	2.59		BGW	Pv1014	IPC
UGA-0034225	Raddeanin A	T3878	2020-11-28	> 3.33	86.1		> 1.11	97.1		> 3.33	26.7		BGW	Pv1024	IPC
UGA-0034225	Raddeanin A	T3878	2020-10-02	5.1	76.2		> 1.11	44.9		3.14	76.7		BGW	Pv1014	IPC
UGA-0034255	CCT241736	T4428	2020-11-28	> 10.0	37.6		> 3.33	75.7		> 10.0	18		BGW	Pv1024	IPC
UGA-0034255	CCT241736	T4428	2020-10-02	> 3.33	57.7		9.75	71.8		> 10.0	15.8		BGW	Pv1014	IPC
UGA-0034269	666-15	T5318	2020-11-28	1.53	79.3		1.09	90.1		> 3.33	33.9		BGW	Pv1024	IPC
UGA-0034269	666-15	T5318	2020-10-02	1.71	72.5		1.61	63.7		3.69	74.3		BGW	Pv1014	IPC
UGA-0034295	Givinostat	T6279	2020-11-28	3.35	86.1		2.13	93.7		> 10.0	16.3		BGW	Pv1024	IPC
UGA-0034295	Givinostat	T6279	2020-10-02	6	68.6		9.33	68.3		> 10.0	21.9		BGW	Pv1014	IPC
UGA-0034305	AR42	T6392	2020-11-28	0.359	95.6		0.523	99.6		> 3.33	34		BGW	Pv1024	IPC
UGA-0034305	AR42	T6392	2020-10-02	0.697	89.8		1.15	84		8.06	39.7		BGW	Pv1014	IPC
UGA-0097160	MMV084978	MMV084978-05	2023-07-16	> 50.0	60.4		> 50.0	41.5		> 50.0	6.3		QWK	PQRC21-113	IPC
UGA-0097160	MMV084978	MMV084978-05	2023-07-13	> 50.0	40		> 50.0	43.8		> 50.0	9.23		BGW	PQRC21-113	IPC
UGA-0097160	MMV084978	MMV084978-04	2023-07-17	> 50.0	59.1		ND	62.3		> 50.0	5.87		QWK	PQRC21-113	IPC
UGA-0097160	MMV084978	MMV084978-04	2023-07-14	> 50.0	59.8		> 50.0	40.7		> 50.0	13.8		BGW	PQRC21-113	IPC
